# Supplementary material
Source: PubMed Central journal article supplement (PMC5253108)
Supplement: NIHMS832726-supplement-supporting_information.pdf [file NIHMS832726-supplement-supporting_information.pdf]

# Supplementary Material

## Optimization of Substituted Imidazobenzodiazepines as Novel Asthma Treatments

Jahan, Rajwana<sup>1</sup>, Stephen, Michael R.<sup>1</sup>, Forkuo, Gloria S.<sup>1</sup>, Kodali, Revathi<sup>1</sup>, Guthrie, Margaret L.<sup>1</sup>, Nieman, Amanda N.<sup>1</sup>, Yuan, Nina Y.<sup>1</sup>, Zahn, Nicolas M., Poe, Michael M.<sup>1</sup>, Li, Guanguan<sup>1</sup>, Yu, Olivia B.<sup>1</sup>, Yocum, Gene T.<sup>2</sup>, Emala, Charles W.<sup>2</sup>, Stafford, Douglas C.<sup>1</sup>, Cook, James M.<sup>1,\*</sup> and Arnold, Leggy A.<sup>1,\*</sup>

<sup>1</sup>Department of Chemistry and Biochemistry and the Milwaukee Institute for Drug Discovery, University of Wisconsin-Milwaukee, Milwaukee, Wisconsin, 53201.;

<sup>2</sup>Department of Anesthesiology, Columbia University, New York, New York, 10032.

\*Corresponding authors, Department of Chemistry and Biochemistry, University of Wisconsin-Milwaukee, Milwaukee, Wisconsin, 53201, arnold2@uwm.edu

**Patch clamp assay:** HEK293T stably expressing  $\alpha 1\beta 3\gamma 2$  GABA<sub>A</sub>R or  $\alpha 4\beta 3\gamma 2$  were maintained RPMI 1640 medium with L-glutamine supplemented with 10% (v/v) fetal bovine serum and 1% penicillin/streptomycin. Automated patch-clamp studies were conducted as described previously.[1] Briefly, the IonFlux plate layout consists of units of 12 wells: two wells contain intracellular solution (ICS containing 140 mM CsCl, 1 mM CaCl<sub>2</sub>, 1 mM MgCl<sub>2</sub>, 11 mM EGTA, 10 mM HEPES, pH 7.2 with CsOH), one contains cells diluted in extracellular solution (ECS containing 140 mM NaCl, 5.4 mM KCl, 1 mM CaCl<sub>2</sub>, 10 mM D-glucose monohydrate, and 10 mM HEPES, pH 7.4 with NaOH), eight contain different concentration of **16** in the presence of GABA at 0.1% DMSO. Well 1 is for waste collection. Cells are captured from suspension by

applying suction to microscopic channels in ensemble recording arrays. Once the array is fully occupied, the applied suction breaks the membranes of captured cells, which establishes whole cell voltage clamp. For compound applications, pressure is applied to the appropriate compound wells, which introduces the compound into the extracellular solution rapidly flowing over the cells. For recording GABA<sub>A</sub>R induced currents, cell arrays were voltage clamped at a hyperpolarizing holding potential of  $-80$  mV. Prior to use on the automated patch clamp, cells were centrifuged at 380g for 5 minutes and resuspended gently in ECS. This was repeated two more times before the cells were dispensed into the plate. All compound application were carried out for 3 seconds followed by a 5 second washout.

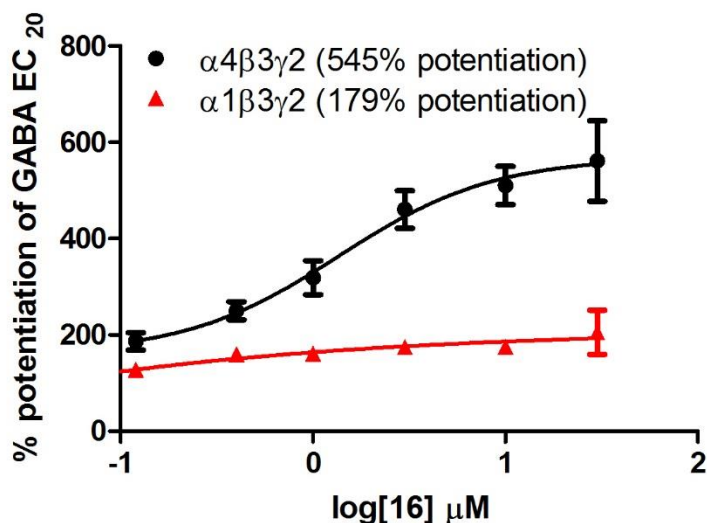

#### *Microsomal stability assay procedure*

4  $\mu$ L of 1 mM test compound at a final concentration of 10  $\mu$ M in DMSO were preincubated at 37°C for 5 minutes on a digital heating shaking dry bath (Fischer scientific, Pittsburgh, PA) in a mixture containing 282  $\mu$ L of water, 80  $\mu$ L of phosphate buffer (0.5 M, pH 7.4) 20  $\mu$ L of NADPH Regenerating System Solution A (BD Bioscience, San Jose, CA) and 4  $\mu$ L of NADPH Regenerating System Solution B (BD Bioscience, San Jose, CA) in a total volume of 391.2  $\mu$ L. Following preincubation, the reaction was initiated by addition of 8.8  $\mu$ L of either human liver microsomes (BD Gentest, San Jose, CA) or mouse liver microsomes (Life technologies, Rockford, IL) at a protein concentration of 0.5 mg/mL. Aliquots of 50  $\mu$ L were taken at time intervals of 0 (without microsomes), 10, 20, 30, 40, 50 and 60 minutes. Each aliquot was added to 100  $\mu$ L of cold acetonitrile solution containing 1  $\mu$ M of verapamil HCl as internal standard. This was followed by sonication for 10 seconds and centrifugation at 10,000 rpm for 5 minutes. 100  $\mu$ L of the supernatant was transferred into Spin-X HPLC filter tubes (Corning Incorporated, NY) and centrifuged at 13,000 rpm for 5 minutes. The filtrate was diluted 100 fold and subsequently analyzed by LC-MS/MS with Shimadzu LCMS 8040, (Shimadzu Scientific Instruments, Columbia, MD). The ratio of the peak areas of the internal standard and test compound was calculated for every time point and the natural log of the ratio were plotted against time to

determine the linear slope (k). The metabolic rate ( $k \cdot C_0/C$ ), half-life ( $0.693/k$ ), and internal clearance ( $V \cdot k$ ) were calculated, where k is the slope,  $C_0$  is the initial concentration of test compound, C is the concentration of microsomes, and V is the volume of incubation in  $\mu\text{L}$  per microsomal protein in mg. All experiments were repeated three times in duplicates.

| Entry | Compound   | Microsomal stability (human)<br>Half-life (min) | Microsomal stability (human)<br>% left after 1 hour | Microsomal stability (mouse)<br>Half-life (min) | Microsomal stability (mouse)<br>% left after 1 hour |
|-------|------------|-------------------------------------------------|-----------------------------------------------------|-------------------------------------------------|-----------------------------------------------------|
| 1     | <b>5</b>   | -                                               | 99.1 ± 0.1                                          | 318.3 ± 66                                      | 85.4 ± 0.3                                          |
| 2     | <b>5a</b>  | 841 ± 133                                       | 92.8 ± 0.3                                          | 351 ± 96                                        | 85.5 ± 0.3                                          |
| 3     | <b>7</b>   | 713 ± 171                                       | 92.1 ± 1.0                                          | 24.1 ± 0.8                                      | 16.2 ± 0.2                                          |
| 4     | <b>7a</b>  | 1014 ± 241                                      | 91.9 ± 0.4                                          | 25.7 ± 1.1                                      | 17.6 ± 0.2                                          |
| 5     | <b>6</b>   | 659 ± 178                                       | 91.74 ± 0.2                                         | 540 ± 83                                        | 91.05 ± 0.14                                        |
| 6     | <b>8</b>   | 579 ± 105                                       | 90.55 ± 0.15                                        | 57.6 ± 2.8                                      | 46.6 ± 0.3                                          |
| 7     | <b>9</b>   | 80.1 ± 10.1                                     | 56.1 ± 0.5                                          | 73.4 ± 6.5                                      | 52.9 ± 0.5                                          |
| 8     | <b>9a</b>  | 336 ± 70                                        | 84.6 ± 0.3                                          | 282.6 ± 28.5                                    | 84.6 ± 0.16                                         |
| 9     | <b>10</b>  | 666 ± 200                                       | 89.74 ± 0.22                                        | 128.85 ± 8                                      | 70.32 ± 0.2                                         |
| 10    | <b>10a</b> | 979 ± 406                                       | 92.9 ± 0.2                                          | 285 ± 34                                        | 85.88 ± 0.2                                         |
| 11    | <b>11</b>  | 169 ± 13                                        | 77.8 ± 0.2                                          | 19.5 ± 1.0                                      | 13.38 ± 0.9                                         |
| 12    | <b>11a</b> | 201 ± 18                                        | 78.7 ± 0.2                                          | 26.9 ± 1.0                                      | 22.36 ± 0.25                                        |
| 13    | <b>12</b>  | Insoluble                                       | For                                                 | Rotarod                                         | Studies                                             |
| 14    | <b>12a</b> | 204 ± 25                                        | 77.05 ± 0.25                                        | 109.09 ± 9.83                                   | 62.48 ± 0.30                                        |
| 15    | <b>13</b>  | Insoluble                                       | For                                                 | Rotarod                                         | Studies                                             |
| 16    | <b>13a</b> | Insoluble                                       | For                                                 | Rotarod                                         | studies                                             |
| 17    | <b>14</b>  | Insoluble                                       | For                                                 | Rotarod                                         | Studies                                             |
| 18    | <b>14a</b> | Insoluble                                       | For                                                 | Rotarod                                         | Studies                                             |
| 19    | <b>15</b>  | 976 ± 466                                       | 93.8 ± 0.3                                          | 64.7 ± 2.3                                      | 54.3 ± 0.2                                          |
| 20    | <b>15a</b> | 1433 ± 845                                      | 94.9 ± 0.2                                          | 77.4 ± 5.7                                      | 56.8 ± 0.3                                          |
| 21    | <b>16</b>  | 705 ± 281                                       | 90.7 ± 0.3                                          | 63.3 ± 3.4                                      | 50.1 ± 0.2                                          |
| 22    | <b>16a</b> | 799.3 ± 217                                     | 93.5 ± 0.2                                          | 1482 ± 910                                      | 94.8 ± 0.2                                          |
| 23    | <b>17</b>  | 732.6 ± 281                                     | 92.4 ± 0.2                                          | 283 ± 59                                        | 82.5 ± 0.3                                          |
| 24    | <b>17a</b> | 1280 ± 987                                      | 96.3 ± 0.3                                          | 273 ± 34                                        | 83.1 ± 0.2                                          |
| 25    | <b>18</b>  | 194 ± 19                                        | 79.9 ± 0.2                                          | 624 ± 184                                       | 91.3 ± 0.2                                          |
| 26    | <b>18a</b> | 429 ± 73                                        | 88.1 ± 0.2                                          | 1290 ± 834                                      | 94.1 ± 0.2                                          |
| 27    | <b>19</b>  | 788 ± 114                                       | 92.8 ± 0.5                                          | 13.3 ± 0.5                                      | 4.2 ± 0.2                                           |
| 28    | <b>19a</b> | 1799 ± 1077                                     | 95.6 ± 0.2                                          | 17.7 ± 1.2                                      | 9.4 ± 0.4                                           |

*Cytotoxicity assay.* Human liver hepatocellular carcinoma (HEPG2), human embryonic kidney 293T (HEK293T) and human bronchial epithelial (BEAS 2B) cell lines were purchased (ATCC) and cultured in 75 cm<sup>2</sup> flasks (CellStar). Cells were grown in DMEM/High Glucose (Hyclone, #SH3024301) media to which non-essential amino acids (Hyclone, #SH30238.01), 10 mM HEPES (Hyclone, #SH302237.01), 5 x 10<sup>6</sup> units of penicillin and streptomycin (Hyclone, #SV30010), and 10% of heat inactivated fetal bovine serum (Gibco, #10082147) were added. Cells were harvested using 0.05% Trypsin (Hyclone, #SH3023601), washed with PBS, and dispensed into sterile white, optical bottom 384-well plates (NUNC, #142762). After three hours, small molecule solutions

were transferred with a Tecan Freedom EVO liquid handling system equipped with a 100 nL pin tool (V&P Scientific). The controls were 3-dibutylamino-1-(4-hexyl-phenyl)-propan-1-one (25 mM in DMSO, positive control) and DMSO (negative control). The cells were incubated for 48 hours followed by the addition of CellTiter-Glo™, a luminescence-based cell viability assay (Promega, Madison, WI). All luminescence readings were performed on a Tecan Infinite M1000 plate reader. The assay was carried out in quadruplet with three independent runs. The data was normalized to the controls and analyzed by nonlinear regression (GraphPad Prism).

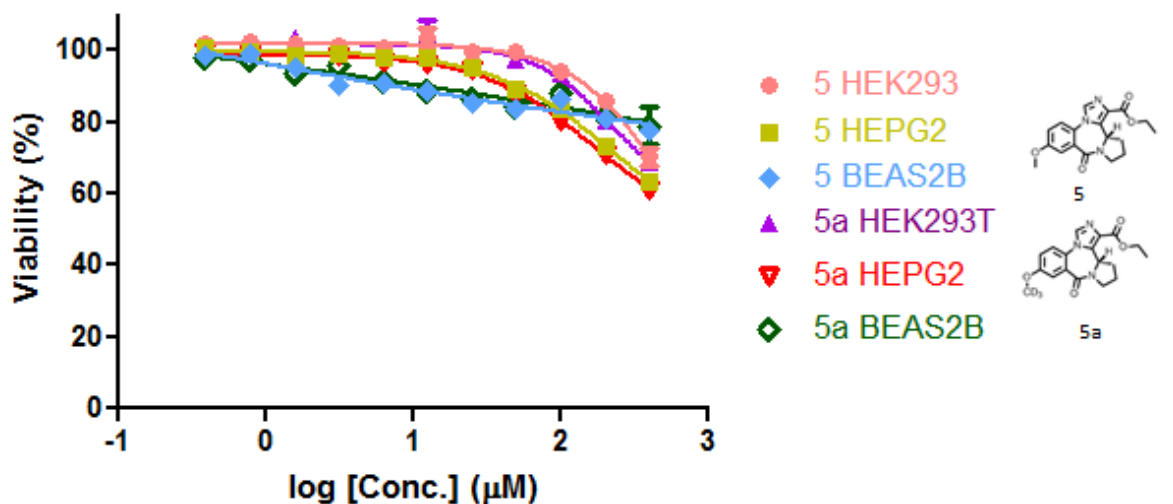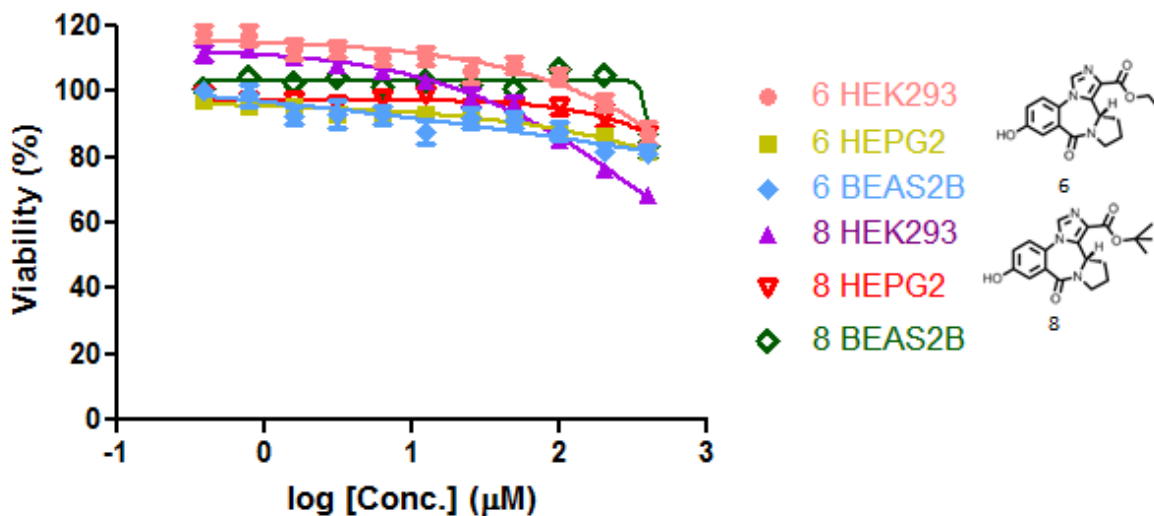

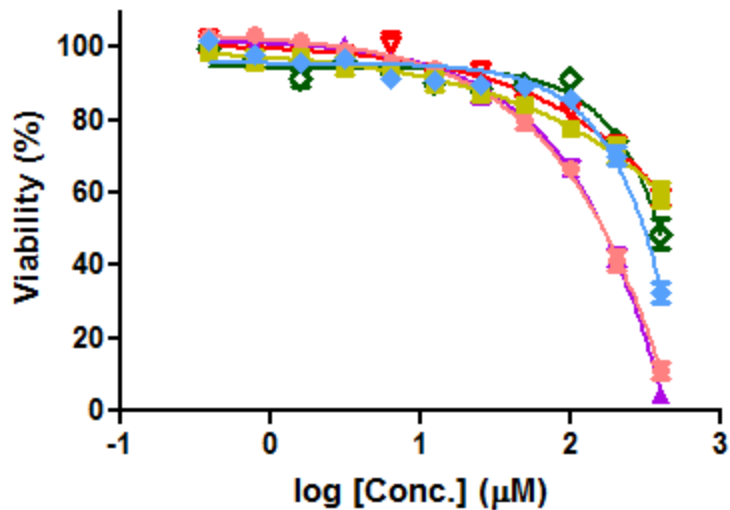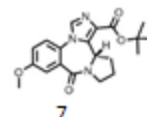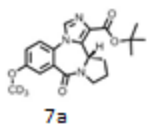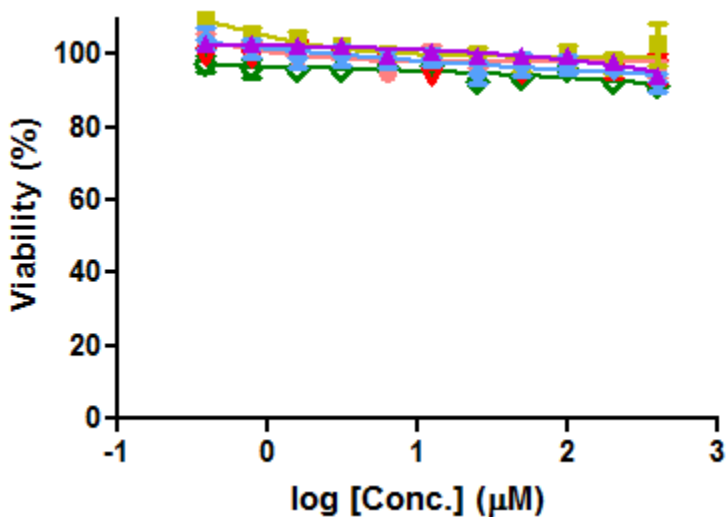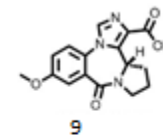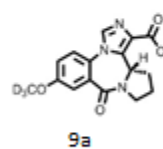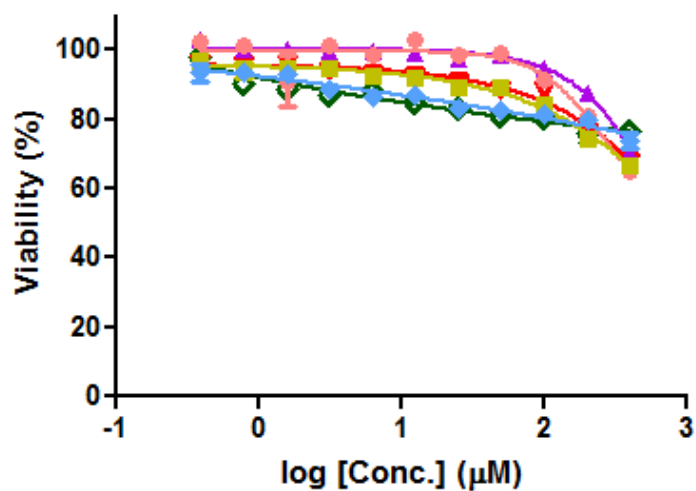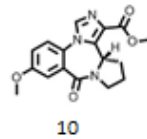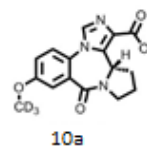

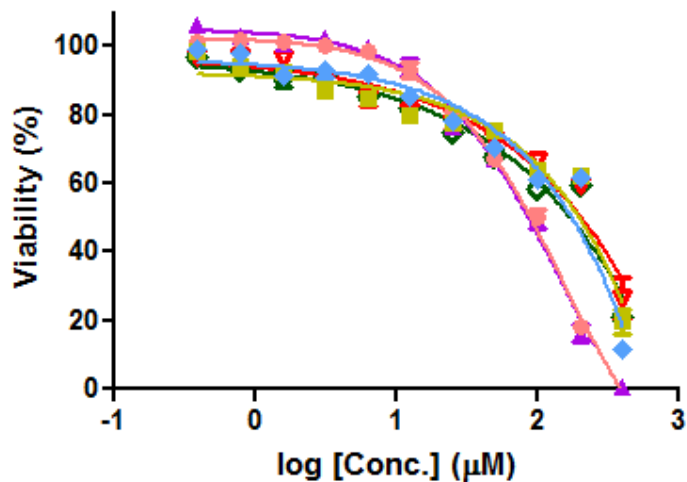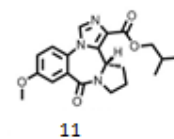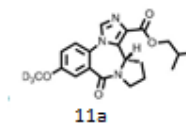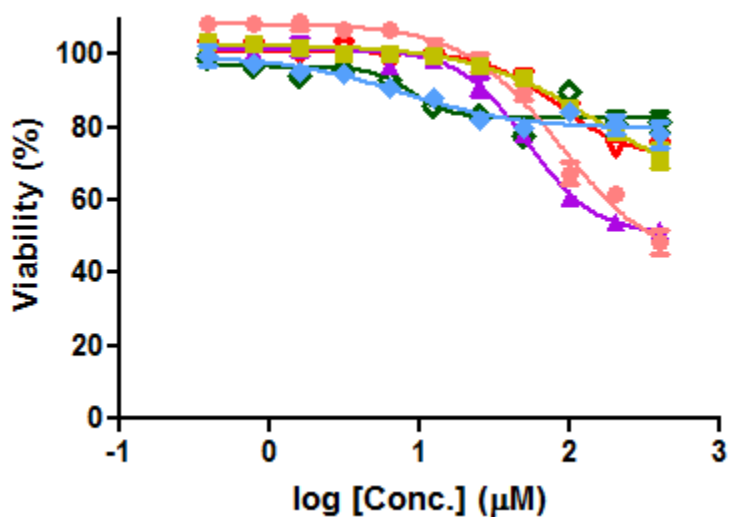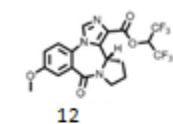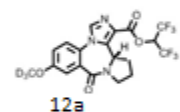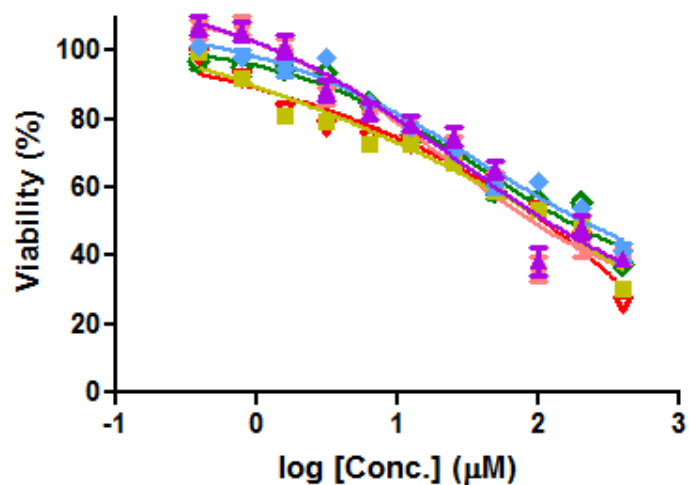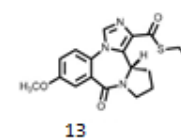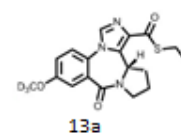

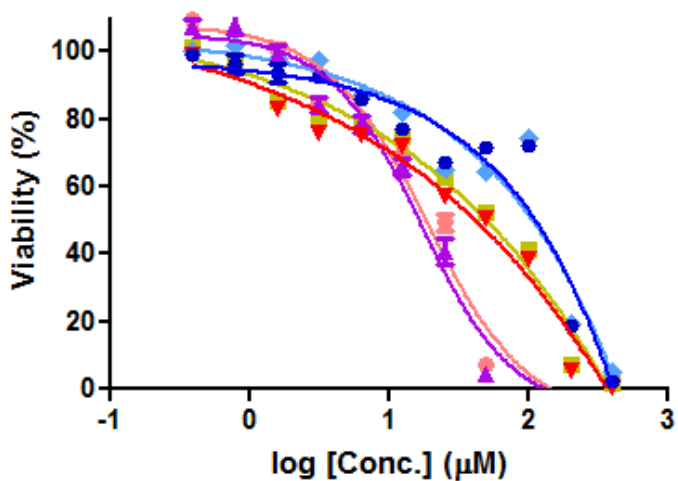

- 14 HEK293
- 14 HEPG2
- ◆ 14 BEAS2B
- ▲ 14a HEK293
- ▼ 14a HEPG2
- 14a BEAS2B

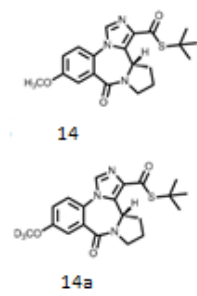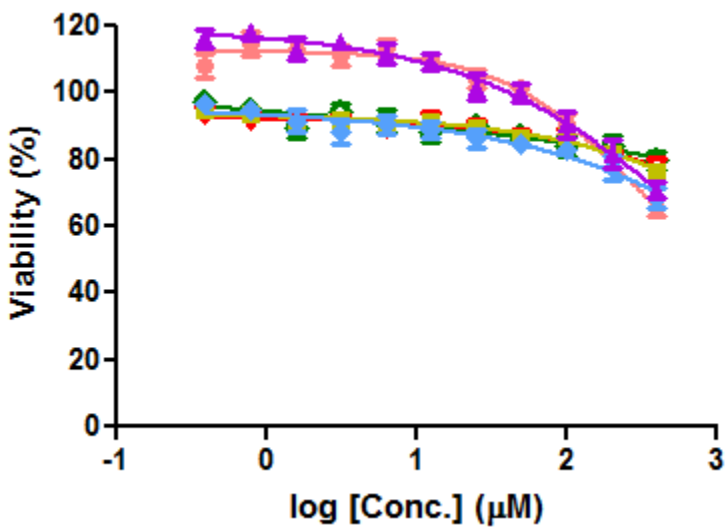

- 15 HEK293
- 15 HEPG2
- ◆ 15 BEAS2B
- ▲ 15a HEK293
- ▼ 15a HEPG2
- ◇ 15a BEAS2B

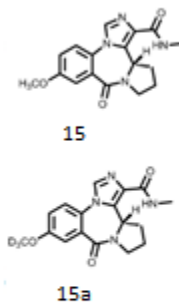

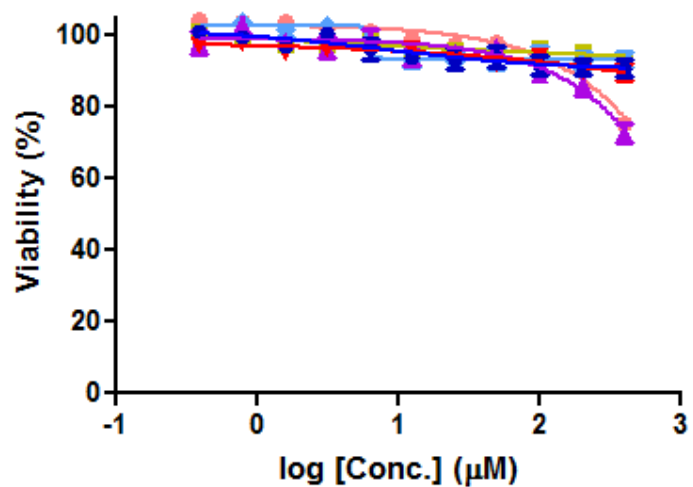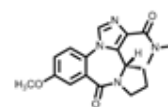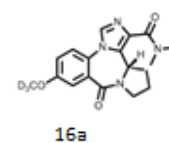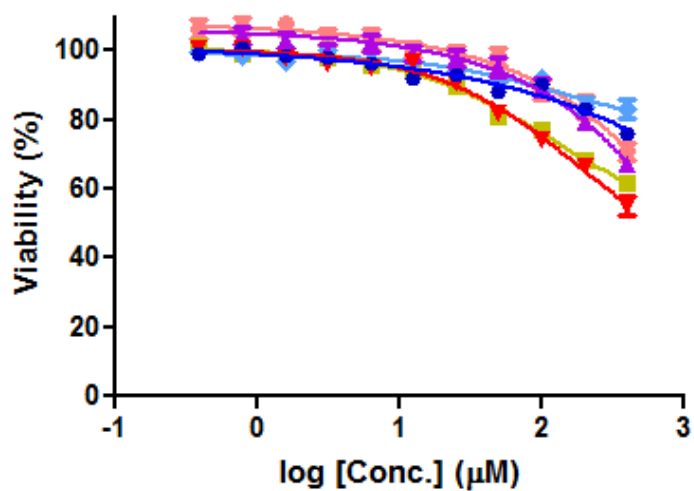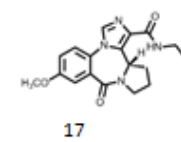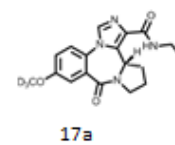



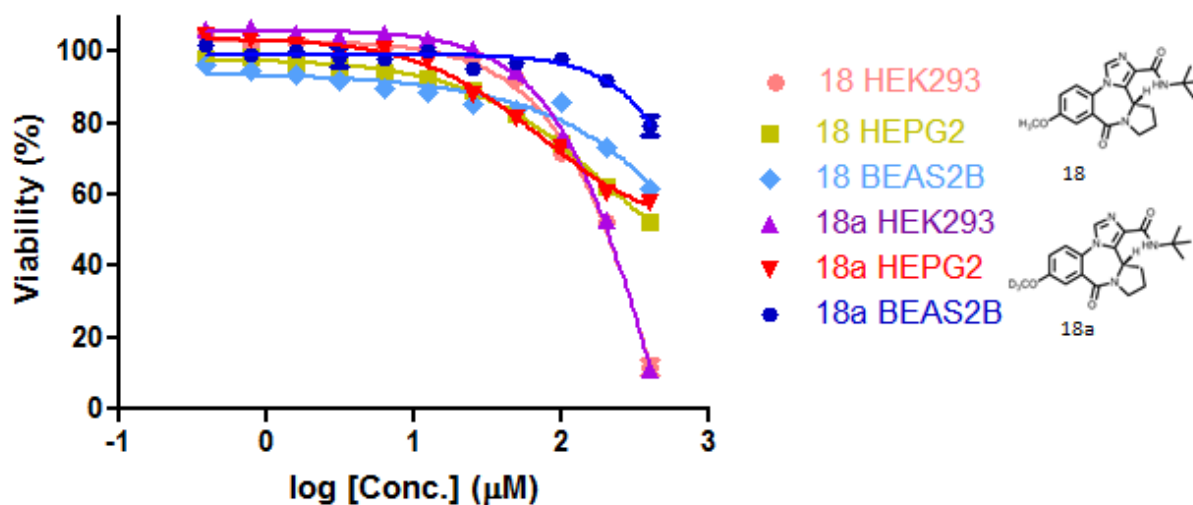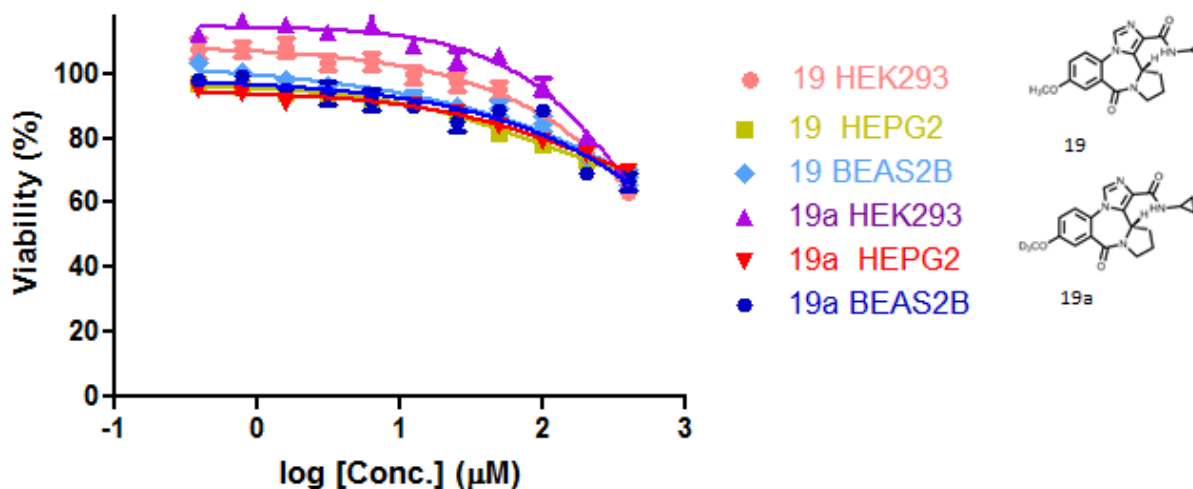

*Pharmacokinetic study:* Blood samples were thawed on ice, vortexed for 10 seconds, and a 100 µL aliquot was taken and added to 400 µL cold acetonitrile containing [20 nM] internal standard 1 (Hz166). Samples were vortexed for 30 seconds and centrifuged at 13,000 RPM for 3 minutes. The supernatant layer was then transferred to clean tubes and evaporated overnight. The residue was reconstituted with 300 µL of mobile phase and spin-filtered through 0.22 µm nylon centrifugal filter units (Costar). After reconstitution, verapamil (internal standard 2) was added and 5 µL of the sample was injected to the LC-MS/MS.

Brain and lung tissue samples were stored in liquid nitrogen prior to homogenization and extraction. Whole organs were thawed over ice, weighed, and homogenized directly into 500 µL ACN containing internal standard 1 (HZ166) using a Benchmark Scientific BeadBug Homogenizer with three 3.2mm stainless steel beads. Samples were homogenized for 30 seconds, centrifuged for 3 minutes at 13,000 RPM. This process was repeated for a total of three extractions.

The supernatants were combined and prepared in the same manner as the blood samples for LC-MS/MS analysis.

High performance liquid chromatography (HPLC) was performed with Shimadzu Nexera X2 LC30AD series pumps (Shimadzu, Kyoto, Japan) that include a 20A5R degassing unit, SIL 30AC autosampler and a 20A column oven. Analytes were separated by a Restek Ultra Biphenyl II column (2.1 mm × 50 mm, 5 μm particle size, Restek, California, US) under gradient elution at a flow rate of 0.6 mL/min. The mobile phase was acetonitrile and water (both containing 0.1% formic acid). Time program: 10% B → 99% B (3 min), hold at 99% B (3.75 min), return to 10% B (4 min), hold (4.5 min). Column Temperature: 50°C.

Analytes were monitored under positive mode by Shimadzu 8040 triple quadrupole mass analyzer (Shimadzu, Kyoto, Japan) electrospray (ESI) and atmospheric pressure ionization (APCI) run in dual (DUIS) mode. The following transitions are monitored in multiple reaction monitoring (MRM) mode. Ion transition pairs for **17** are 340.85 > 296.00, 340.85 > 277.95, 340.85 > 268.10 and 340.85 > 227.15. Transition pairs for HZ-166 are m/z 356.90 > m/z 311.15, m/z 356.90 > m/z 283.15, and m/z 356.90 > m/z 282.15. Transition pairs for verapamil (internal standard) are 454.70 > 165.15, 454.70 > 150.20, and 454.70 > 303.30. Collision energy is optimized for each transition to obtain optimal sensitivity. The mass spectrometer was operated with the heat block temperature of 400°C, drying gas flow of 15 L/min, desolvation line temperature of 250°C, nebulizing gas flow of 1.5 L/min, and both needle and interface voltages of 4.5 kV. The response acquisition was performed using LabSolutions software.

*Sample preparation of calibration standards and quality control for LC-MS/MS:* HZ-166 was chosen as an internal standard (I.S.) because it has similar chemical structure as that of **17** and was therefore used to account for sample dilution, evaporation, and matrix effects. Verapamil was also used as a second standard to monitor instrumental variations. Stock solutions of all were prepared at concentration of 2 mg/mL separately in ACN and stored in a -20 °C freezer, with the exception of the acid which was prepared in 80:20 ACN:water. Intermediate working solutions of each were prepared by serial dilution with mobile phase (80:20, ACN:water with 0.1% formic acid). Calibration curve cocktails were prepared at concentrations of 1, 5, 10, 15, 25, 50, 75, 100, and 150 nM.

The intra-run/within-run validation was performed on concentrations of 10, 25 and 75 nM with three replicates for each concentration. For separate validations, separate standard curves were freshly prepared. The standard curves were fitted by a linear regression and the validation samples were calculated back by the calibration curve of that day. The mean and the coefficient of variance (CV) were calculated accordingly. Accuracy was calculated by comparing calculated concentrations to corresponding nominal.

Pharmacokinetic parameters were calculated with PK solutions software 2.0 and fitted to the following equation:  $c = A \cdot e^{-at} + B \cdot e^{-bt}$ . Due to the rapid absorption two phases could be identified as distribution/absorption phase and elimination phase.

## Compound characterization

(*S*)-*tert*-Butyl-7-(<sup>2</sup>H<sub>3</sub>)-methoxy-9-oxo-11,12,13,13a-tetrahydro-9H-benzo[e]imidazo[5,1-*c*]pyrrolo[1,2-*a*][1,4]diazepine-1-carboxylate (**7a**): The *tert*-butyl ester **7a** was prepared from ethyl ester **5a** by following the same procedure employed for preparation of *tert*-Butyl ester **7** in 67% yield: M.p = 114-115 °C; <sup>1</sup>H NMR (300 MHz, CDCl<sub>3</sub>) δ 1.65 (s, 9H), 2.15-2.34 (m, 3H), 3.50-3.63 (m, 2H), 3.77-3.84 (m, 1H), 4.75 (d, 1H, *J* = 7.2 Hz), 7.15 (dd, 1H, *J* = 8.8 Hz, 2.8 Hz), 7.27-7.32 (m, 1H), 7.59 (d, 1H, *J* = 2.8 Hz), 7.79 (s, 1H); <sup>13</sup>C NMR (75 MHz, CDCl<sub>3</sub>) δ 24.4, 28.2, 28.4, 46.7, 53.5, 81.8, 114.4, 119.8, 124.6, 126.3, 129.3, 130.6, 135.7, 136.5, 159.3, 162.6, 163.8; HRMS (ESI) (M+H)<sup>+</sup>, calcd. for C<sub>20</sub>H<sub>21</sub><sup>2</sup>H<sub>3</sub>N<sub>3</sub>O<sub>4</sub> 373.1950; Found 373.1951.

The <sup>13</sup>C-D signal was not observed due to *due to long relaxation time, reduced NOE effect and spin-spin coupling for most deuterium analogs.*

(*S*)-*tert*-Butyl-7-hydroxy-9-oxo-11,12,13,13a-tetrahydro-9H-benzo[e]imidazo[5,1-*c*]pyrrolo[1,2-*a*][1,4]diazepine-1-carboxylate (**8**): The *tert*-butyl ester **8** was prepared from phenolic ethyl ester **6** following the same procedure employed for preparation of *tert*-Butyl ester **7** in 65% yield: M.p = 174-175 °C; <sup>1</sup>H NMR (300 MHz, CDCl<sub>3</sub>) δ 1.63 (s, 9H), 2.09-2.34 (m, 3H), 3.50-3.62 (m, 2H), 3.77-3.85 (m, 1H), 4.79 (d, 1H, *J* = 7.1 Hz), 7.10 (dd, 1H, *J* = 8.6 Hz, 2.2 Hz), 7.23-7.28 (m, 1H), 7.77 (bs, 1H), 7.85 (s, 1H), 9.75 (bs, 1H); <sup>13</sup>C NMR (75 MHz, CDCl<sub>3</sub>) δ 24.4, 28.2, 28.3, 46.9, 53.7, 82.0, 117.4, 120.7, 124.9, 125.1, 129.1, 129.6, 135.8, 136.2, 157.7, 162.3, 164.6; HRMS (ESI) (M+H)<sup>+</sup>, calcd. for C<sub>19</sub>H<sub>22</sub>N<sub>3</sub>O<sub>4</sub> 356.1605; Found 356.1615.

(*S*)-11,12,13,13a-Tetrahydro-7-(<sup>2</sup>H<sub>3</sub>)-methoxy-9-oxo-9H-imidazo[1,5-*a*]pyrrolo[2,1-*c*][1,4]benzodiazepine-1-carboxylic acid (**9a**): The acid **9a** was prepared from ester **5a** following the procedure employed for preparation of acid **9** in 82% yield: M.p = 210-212 °C; [α]<sub>D</sub><sup>25</sup> = +8.00 (c 0.25%, in CH<sub>3</sub>OH); <sup>1</sup>H NMR (300 MHz, CDCl<sub>3</sub>) δ 2.17-2.34 (m, 3H), 3.48-3.83 (m, 3H), 4.72 (d, 1H, *J* = 7.1 Hz), 7.17 (dd, 1H, *J* = 8.7 Hz, 2.3 Hz), 7.31-7.35 (m, 1H), 7.60 (d, 1H, *J* = 2.3 Hz), 7.82 (s, 1H); <sup>13</sup>C NMR (75 MHz, CDCl<sub>3</sub>) δ 24.4, 28.5, 46.7, 53.2, 114.7, 119.8, 124.5, 125.7, 126.7, 130.8, 134.8, 137.5, 159.7, 161.5, 163.6; HRMS (ESI) (M+H)<sup>+</sup>, calcd. for C<sub>16</sub>H<sub>13</sub><sup>2</sup>H<sub>3</sub>N<sub>3</sub>O<sub>4</sub> 317.1324; Found 317.1328. This material was employed directly in the next step.

(*S*)-Methyl-7-(<sup>2</sup>H<sub>3</sub>)-methoxy-9-oxo-11,12,13,13a-tetrahydro-9H-benzo[e]imidazo[5,1-*c*]pyrrolo[1,2-*a*][1,4]diazepine-1-carboxylate (**10a**): The methyl ester **10a** was prepared from acid **5a** following the procedure employed for preparation of methyl ester **10** in 97% yield: M.p = 182-183 °C; <sup>1</sup>H NMR (300 MHz, CDCl<sub>3</sub>) δ 2.17-2.37 (m, 3H), 3.50-3.63 (m, 2H), 3.75-3.83 (m, 1H), 3.95 (s, 3H), 4.76 (d, 1H, *J* = 7.0 Hz), 7.17 (dd, 1H, *J* = 8.8 Hz, 2.9 Hz), 7.34 (d, 1H, *J* = 8.8 Hz), 7.60 (d, 1H, *J* = 2.9 Hz), 7.82 (s, 1H); <sup>13</sup>C NMR (75 MHz, CDCl<sub>3</sub>) δ 24.4, 28.4, 46.6, 52.2, 53.5, 114.5, 119.8, 124.6, 126.0, 127.3, 130.6, 135.9, 137.9, 159.4, 163.2, 163.7. HRMS (ESI) (M+H)<sup>+</sup>, calcd. for C<sub>17</sub>H<sub>15</sub><sup>2</sup>H<sub>3</sub>N<sub>3</sub>O<sub>4</sub> 331.1480; Found 331.1486.

(*S*)-Isobutyl-7-(<sup>2</sup>H<sub>3</sub>)-methoxy-9-oxo-11,12,13,13a-tetrahydro-9H-benzo[e]imidazo[5,1-*c*]pyrrolo[1,2-*a*][1,4]diazepine-1-carboxylate (**11a**): The isobutyl ester **11a** was prepared from acid **9a** following the general procedure with dry isobutanol as the nucleophile. The crude residue was

purified by flash column chromatography [silica gel, EtOAc/hexane (7:3)] to yield pure isobutyl ester **11a** as a solid in 61% yield: M.p = 125-127 °C; <sup>1</sup>H NMR (300 MHz, CDCl<sub>3</sub>) δ 1.03 (d, 6H, J = 6.7 Hz), 2.12-2.31 (m, 4H), 3.51-3.62 (m, 2H), 3.76-3.82 (m, 1H), 4.14 (d, 2H, J = 6.9 Hz), 4.76 (d, 1H, J = 6.9 Hz), 7.16 (dd, 1H, J = 8.8 Hz, 2.9 Hz), 7.32 (d, 1H, J = 8.8 Hz), 7.59 (d, 1H, J = 2.9 Hz), 7.81 (s, 1H); <sup>13</sup>C NMR (75 MHz, CDCl<sub>3</sub>) δ 19.1, 24.2, 27.6, 28.2, 46.4, 53.3, 71.0, 114.3, 119.5, 124.5, 125.9, 127.5, 130.4, 135.7, 137.4, 159.2, 162.8, 163.5. HRMS (ESI) (M+H)<sup>+</sup>, calcd. for C<sub>20</sub>H<sub>21</sub><sup>2</sup>H<sub>3</sub>N<sub>3</sub>O<sub>4</sub> 373.1950; Found 373.1955.

*(S)*-1,1,1,3,3,3-Hexafluoropropan-2-yl-7-methoxy-9-oxo-11,12,13,13a-tetrahydro-9H-benzo[e]imidazo[5,1-c]pyrrolo[1,2-a][1,4]diazepine-1-carboxylate (**12**): The hexafluoro isopropyl ester **12** was prepared from acid **9** following the general procedure with dry 1,1,1,3,3,3-hexafluoropropan-2-ol as the nucleophile. The crude residue was purified by flash column chromatography [silica gel, EtOAc/hexane (1:1)] to yield pure ester **12** as a solid in 95% yield: M.p = 204-205 °C; [α]<sub>D</sub><sup>25</sup> = +16.67 (c 0.3%, in CH<sub>2</sub>Cl<sub>2</sub>); <sup>1</sup>H NMR (300 MHz, CDCl<sub>3</sub>) δ 2.16-2.29 (m, 3H), 3.38-3.40 (m, 1H), 3.52-3.62 (m, 1H), 3.79-3.85 (m, 1H), 3.92 (s, 3H), 4.77 (d, 1H, J = 7.3 Hz), 5.98-6.08 (m, 1H), 7.18 (dd, 1H, J = 8.8 Hz, 2.8 Hz), 7.33 (d, 1H, J = 8.8 Hz), 7.61 (d, 1H, J = 2.8 Hz), 7.87 (s, 1H); <sup>13</sup>C NMR (75 MHz, CDCl<sub>3</sub>) δ 24.3, 28.3, 46.6, 53.4, 55.9, 66.7 (sep, J = 34.5 Hz), 114.7, 119.9, 120.6 (q, J = 279 Hz), 124.3, 124.6, 125.6, 130.6, 136.8, 140.6, 159.4, 159.7, 163.6; HRMS (ESI) (M+Na)<sup>+</sup>, calcd. for C<sub>19</sub>H<sub>15</sub>F<sub>6</sub>N<sub>3</sub>O<sub>4</sub>Na 486.0864; Found 486.0875.

*(S)*-1,1,1,3,3,3-Hexafluoropropan-2-yl-7-(<sup>2</sup>H<sub>3</sub>)-methoxy-9-oxo-11,12,13,13a-tetrahydro-9H-benzo[e]imidazo[5,1-c]pyrrolo[1,2-a][1,4]diazepine-1-carboxylate (**12a**): The hexafluoro isopropyl ester **12a** was prepared from acid **9a** following the general procedure with dry 1,1,1,3,3,3-hexafluoropropan-2-ol as the nucleophile. The crude residue was purified by column chromatography [silica gel, EtOAc/hexane (7:3)] to yield pure ester **12a** as a solid in 97% yield: M.p = 204-206 °C; <sup>1</sup>H NMR (300 MHz, CDCl<sub>3</sub>) δ 2.15-2.34 (m, 3H), 3.38-3.42 (m, 1H), 3.53-3.63 (m, 1H), 3.80-3.86 (m, 1H), 4.79 (d, 1H, J = 7.3 Hz), 5.98-6.10 (sep, 1H, J = 6.1 Hz), 7.19 (dd, 1H, J = 8.8 Hz, 2.9 Hz), 7.34 (d, 1H, J = 8.8 Hz), 7.62 (d, 1H, J = 2.9 Hz), 7.89 (s, 1H); <sup>13</sup>C NMR (75 MHz, CDCl<sub>3</sub>) δ 24.3, 28.3, 46.6, 53.4, 66.7 (sep, J = 34.5 Hz), 114.6, 119.9, 120.6 (q, J = 279 Hz), 124.3, 124.6, 125.6, 130.6, 136.8, 140.6, 159.5, 159.7, 163.6; HRMS (ESI) (M+Na)<sup>+</sup>, calcd. for C<sub>19</sub>H<sub>13</sub><sup>2</sup>H<sub>3</sub>F<sub>6</sub>N<sub>3</sub>O<sub>4</sub> 467.1228; Found 467.1230.

*(S)*-S-Ethyl-7-methoxy-9-oxo-11,12,13,13a-tetrahydro-9H-benzo[e]imidazo[5,1-c]pyrrolo[1,2-a][1,4]diazepine-1-carbothioate (**13**): The thio ethyl ester **13** was prepared from acid **9** following the general procedure with dry ethanethiol as the nucleophile. The crude residue was purified by flash column chromatography [silica gel, EtOAc/hexane (8:2)] to yield pure thio ester **13** as a solid in 70% yield: M.p = 228-230 °C; [α]<sub>D</sub><sup>25</sup> = -14.29 (c 0.28%, in CH<sub>2</sub>Cl<sub>2</sub>); <sup>1</sup>H NMR (300 MHz, CDCl<sub>3</sub>) δ 1.35 (t, 3H, J = 7.4 Hz), 2.14-2.25 (m, 3H), 3.00 (q, 2H, J = 7.4 Hz), 3.42-3.60 (m, 2H), 3.74-3.82 (m, 1H), 3.91 (s, 3H), 4.71 (d, 1H, J = 7.2 Hz), 7.15 (dd, 1H, J = 8.8 Hz, 2.8 Hz), 7.31 (d, 1H, J = 8.8 Hz), 7.59 (d, 1H, J = 2.8 Hz), 7.79 (s, 1H); <sup>13</sup>C NMR (75 MHz, CDCl<sub>3</sub>) δ 14.6, 23.1, 24.4, 28.6, 46.5, 53.3, 55.9, 114.5, 119.8, 124.5, 125.9, 130.6, 132.5, 134.6, 135.5, 159.5, 163.6, 188.1. HRMS (ESI) (M+Na)<sup>+</sup>, calcd. for C<sub>18</sub>H<sub>19</sub>N<sub>3</sub>O<sub>3</sub>SNa 380.1045; Found 380.1047.

(*S*)-*S*-Ethyl-7-(<sup>2</sup>H<sub>3</sub>)-methoxy-9-oxo-11,12,13,13a-tetrahydro-9H-benzo[e]imidazo[5,1-*c*]pyrrolo[1,2-*a*][1,4]diazepine-1-carbothioate (**13a**): The thio ethyl ester **13a** was prepared from **9a** following the general procedure with dry ethanethiol as the nucleophile. The crude residue was purified by flash column chromatography [silica gel, EtOAc/hexane (8:2)] to yield pure thio ester **13a** as a solid in 80% yield: M.p = 229-231 °C; <sup>1</sup>H NMR (300 MHz, CDCl<sub>3</sub>) δ 1.36 (t, 3H, *J* = 7.4 Hz), 2.18-2.26 (m, 3H), 3.02 (q, 2H, *J* = 7.4 Hz), 3.44-3.61 (m, 2H), 3.76-3.83 (m, 1H), 4.73 (d, 1H, *J* = 6.9 Hz), 7.17 (dd, 1H, *J* = 8.8 Hz, 2.9 Hz), 7.33 (d, 1H, *J* = 8.8 Hz), 7.60 (d, 1H, *J* = 2.9 Hz), 7.81 (s, 1H); <sup>13</sup>C NMR (75 MHz, CDCl<sub>3</sub>) δ 14.6, 23.1, 24.4, 28.6, 46.5, 53.4, 114.6, 119.8, 124.5, 125.9, 130.7, 133.6, 134.6, 135.5, 159.5, 163.6, 188.1. HRMS (ESI) (M+H)<sup>+</sup>, calcd. for C<sub>18</sub>H<sub>17</sub><sup>2</sup>H<sub>3</sub>N<sub>3</sub>O<sub>3</sub>S 361.1408; Found 361.1405.

(*S*)-*S*-*tert*-Butyl-7-methoxy-9-oxo-11,12,13,13a-tetrahydro-9H-benzo[e]imidazo[5,1-*c*]pyrrolo[1,2-*a*][1,4]diazepine-1-carbothioate (**14**): The thio *tert*-butyl ester **14** was prepared from acid **9** following the general procedure with dry *tert*-butyl mercaptan as the nucleophile. The crude residue was purified by flash column chromatography [silica gel, EtOAc/hexane (8:2)] to yield pure thio ester **14** as a solid in 82% yield: M.p = 130-132 °C; [α]<sub>D</sub><sup>27</sup> = -23.54 (c 0.17% in CH<sub>2</sub>Cl<sub>2</sub>); <sup>1</sup>H NMR (300 MHz, CDCl<sub>3</sub>) δ 1.57 (s, 9H), 2.18-2.20 (m, 3H), 3.41-3.59 (m, 2H), 3.74-3.80 (m, 1H), 3.90 (s, 3H), 4.69 (d, 1H, *J* = 7.2 Hz), 7.14 (dd, 1H, *J* = 8.9 Hz, 3.0 Hz), 7.29 (d, 1H, *J* = 8.9 Hz), 7.58 (d, 1H, *J* = 3.0 Hz), 7.74 (s, 1H); <sup>13</sup>C NMR (75 MHz, CDCl<sub>3</sub>) δ 24.3, 28.5, 29.7, 46.4, 47.1, 53.3, 55.8, 114.4, 119.6, 124.5, 125.9, 130.5, 134.2, 135.1, 159.3, 163.5, 188.7; HRMS (ESI) (M+H)<sup>+</sup>, calcd. for C<sub>20</sub>H<sub>24</sub>N<sub>3</sub>O<sub>3</sub>S 386.1533; Found 386.1532.

(*S*)-*S*-*tert*-Butyl-7-(<sup>2</sup>H<sub>3</sub>)-methoxy-9-oxo-11,12,13,13a-tetrahydro-9H-benzo[e]imidazo[5,1-*c*]pyrrolo[1,2-*a*][1,4]diazepine-1-carbothioate (**14a**): The thio *tert*-butyl ester **14a** was prepared from **9a** following the general procedure with dry *tert*-butyl mercaptan as the nucleophile. The crude residue was purified by flash column chromatography [silica gel, EtOAc/hexane (1:1)] to yield pure thio ester **14a** as a solid in 89% yield: M.p = 129-131 °C; <sup>1</sup>H NMR (300 MHz, CDCl<sub>3</sub>) δ 1.52 (s, 9H), 2.11-2.20 (m, 3H), 3.31-3.53 (m, 2H), 3.69-3.75 (m, 1H), 4.67 (d, 1H, *J* = 5.9 Hz), 7.08-7.13 (m, 1H), 7.26-7.30 (m, 1H), 7.52 (d, 1H, *J* = 2.0 Hz), 7.72 (s, 1H); <sup>13</sup>C NMR (75 MHz, CDCl<sub>3</sub>) δ 24.4, 28.6, 29.8, 46.5, 47.1, 53.4, 114.5, 119.7, 124.6, 126.0, 130.6, 134.3, 134.4, 135.2, 159.4, 163.6, 188.8; HRMS (ESI) (M+H)<sup>+</sup>, calcd. for C<sub>20</sub>H<sub>21</sub><sup>2</sup>H<sub>3</sub>N<sub>3</sub>O<sub>3</sub>S 389.1721; Found 389.1725.

(*S*)-7-Methoxy-*N*-methyl-9-oxo-11,12,13,13a-tetrahydro-9H-benzo[e]imidazo[5,1-*c*]pyrrolo[1,2-*a*][1,4]diazepine-1-carboxamide (**15**): The *N*-methyl amide **15** was prepared from acid **9** following the general procedure with a solution of methylamine (33 wt % in absolute ethanol, 3 mL) as the nucleophile. The crude residue was purified by flash column chromatography [neutral alumina, 1% MeOH in CH<sub>2</sub>Cl<sub>2</sub>] to yield pure amide **15** as a solid in 75% yield: M.p = 180-182 °C; [α]<sub>D</sub><sup>25</sup> = +3.70 (c 0.5%, in CH<sub>2</sub>Cl<sub>2</sub>); <sup>1</sup>H NMR (300 MHz, CDCl<sub>3</sub>) δ 2.12-2.25 (m, 2H), 2.30-2.41 (m, 1H), 2.98 (d, 1H, *J* = 4.6 Hz), 3.50-3.62 (m, 1H), 3.73-3.89 (m, 2H), 3.91 (s, 3H), 4.73 (d, 1H, *J* = 7.8 Hz), 7.16 (dd, 1H, *J* = 8.6 Hz, 2.3 Hz), 7.32 (d, 1H, *J* = 8.6 Hz), 7.59 (d, 1H, *J* = 2.3 Hz), 7.72 (brs, 1H), 7.91 (s, 1H); <sup>13</sup>C NMR (75 MHz, CDCl<sub>3</sub>) δ 24.5, 26.2, 28.7, 46.8, 53.5, 55.9, 114.7,

119.8, 124.7, 125.6, 128.5, 130.9, 134.2, 135.6, 159.8, 161.3, 163.5. HRMS (ESI) (M+Na)<sup>+</sup>, calcd. for C<sub>17</sub>H<sub>18</sub>N<sub>4</sub>O<sub>3</sub>Na 349.1277; Found 349.1300.

*(S)*-7-(<sup>2</sup>H<sub>3</sub>)-Methoxy-*N*-methyl-9-oxo-11,12,13,13a-tetrahydro-9*H*-benzo[*e*]imidazo[5,1-*c*]pyrrolo[1,2-*a*][1,4]diazepine-1-carboxamide (**15a**): The *N*-methyl amide **15a** was prepared from acid **9a** following the general procedure with a solution of methylamine (33 wt % in absolute ethanol, 3 mL) as the nucleophile. The crude residue was purified by flash column chromatography [neutral alumina, 1% MeOH in CH<sub>2</sub>Cl<sub>2</sub>] to yield pure amide **15a** as a solid in 92 % yield: M.p = 180-182 °C; <sup>1</sup>H NMR (300 MHz, CDCl<sub>3</sub>) δ 2.12-2.25 (m, 2H), 2.30-2.42 (m, 1H), 2.97 (d, 1H, *J* = 5.0 Hz), 3.50-3.60 (m, 1H), 3.74-3.91 (m, 2H), 4.73 (d, 1H, *J* = 7.6 Hz), 7.14 (dd, 1H, *J* = 8.8 Hz, 2.9 Hz), 7.29 (d, 1H, *J* = 8.8 Hz), 7.48-7.54 (bm, 1H), 7.58 (d, 1H, *J* = 2.9 Hz), 7.70 (s, 1H); <sup>13</sup>C NMR (75 MHz, CDCl<sub>3</sub>) δ 24.5, 25.8, 28.6, 46.5, 53.4, 114.3, 119.4, 124.4, 126.2, 130.2, 130.6, 134.5, 134.9, 159.1, 162.8, 163.7. HRMS (ESI) (M+H)<sup>+</sup>, calcd. for C<sub>17</sub>H<sub>16</sub><sup>2</sup>H<sub>3</sub>N<sub>4</sub>O<sub>3</sub> 330.1640; Found 330.1637.

*(S)*-7-Methoxy-*N,N*-dimethyl-9-oxo-11,12,13,13a-tetrahydro-9*H*-benzo[*e*]imidazo[5,1-*c*]pyrrolo[1,2-*a*][1,4]diazepine-1-carboxamide (**16**): The *N,N*-dimethyl amide **16** was prepared from acid **9** following the general procedure with a solution of *N,N*-dimethylamine (11% in ethanol, 5 mL) as the nucleophile. The crude residue was purified by flash column chromatography [neutral alumina, 5% MeOH in CH<sub>2</sub>Cl<sub>2</sub>] to yield pure dimethyl amide **16** as a solid in 70% yield: M.p = 186-188 °C; [α]<sub>D</sub><sup>25</sup> = +52.00 (c 0.25%, in CH<sub>2</sub>Cl<sub>2</sub>); <sup>1</sup>H NMR (300 MHz, CDCl<sub>3</sub>) δ 2.01-2.08 (m, 2H), 2.25-2.38 (m, 1H), 2.89-2.94 (m, 1H), 3.08 (s, 3H), 3.14 (s, 3H), 3.63-3.82 (m, 2H), 3.91 (s, 3H), 4.73 (dd, 1H, *J* = 8.4, 3.0 Hz), 7.15 (dd, 1H, *J* = 8.9 Hz, 2.9 Hz), 7.34 (d, 1H, *J* = 8.9 Hz), 7.57 (d, 1H, *J* = 2.9 Hz), 7.97 (s, 1H); <sup>13</sup>C NMR (75 MHz, CDCl<sub>3</sub>) δ 23.9, 27.8, 35.3, 39.1, 47.2, 52.3, 55.8, 114.9, 119.7, 124.2, 126.1, 130.1, 131.0, 132.0, 134.8, 159.1, 164.2, 165.7. HRMS (ESI) (M+Na)<sup>+</sup>, calcd. for C<sub>18</sub>H<sub>20</sub>N<sub>4</sub>O<sub>3</sub>Na 363.1433; Found 363.1410.

*(S)*-7-(<sup>2</sup>H<sub>3</sub>)-Methoxy-*N,N*-dimethyl-9-oxo-11,12,13,13a-tetrahydro-9*H*-benzo[*e*]imidazo[5,1-*c*]pyrrolo[1,2-*a*][1,4]diazepine-1-carboxamide (**16a**): The *N,N*-dimethyl amide **16a** was prepared from acid **9a** following the general procedure with a solution of *N,N*-dimethylamine (11% in ethanol, 5 mL) as the nucleophile. The crude residue was purified by flash column chromatography [neutral alumina, 5% MeOH in CH<sub>2</sub>Cl<sub>2</sub>] to yield pure amide **16a** as a solid in 88% yield: M.p = 185-186 °C; <sup>1</sup>H NMR (300 MHz, CDCl<sub>3</sub>) δ 2.01-2.10 (m, 2H), 2.24-2.37 (m, 1H), 2.89-2.98 (m, 1H), 3.07 (s, 3H), 3.14 (s, 3H), 3.63-3.82 (m, 2H), 4.72 (dd, 1H, *J* = 8.3 Hz, 2.9 Hz), 7.13 (dd, 1H, *J* = 8.7 Hz, 2.9 Hz), 7.29 (d, 1H, *J* = 8.7 Hz), 7.56 (d, 1H, *J* = 2.9 Hz), 7.77 (s, 1H); <sup>13</sup>C NMR (75 MHz, CDCl<sub>3</sub>) δ 23.9, 27.9, 35.3, 39.1, 47.2, 52.3, 114.9, 119.7, 124.2, 126.3, 130.1, 131.4, 132.0, 134.9, 159.0, 164.3, 166.1. HRMS (ESI) (M+H)<sup>+</sup>, calcd. for C<sub>18</sub>H<sub>18</sub><sup>2</sup>H<sub>3</sub>N<sub>4</sub>O<sub>3</sub> 344.1796; Found 344.1798.

*(S)*-*N*-Ethyl-7-methoxy-9-oxo-11,12,13,13a-tetrahydro-9*H*-benzo[*e*]imidazo[5,1-*c*]pyrrolo[1,2-*a*][1,4]diazepine-1-carboxamide (**17**): The *N*-ethyl amide **17** was prepared from acid **9** following the general procedure with a solution of ethylamine (2.0 M in THF, 1 mL) as the nucleophile. The crude residue was purified by flash column chromatography [neutral alumina, EtOAc/hexane

(8:2)] to yield pure ethyl amide **17** as a solid in 75% yield: M.p = 175-177 °C;  $[\alpha]_{\text{D}}^{27} = +8.33$  (c 0.12%, in CH<sub>2</sub>Cl<sub>2</sub>); <sup>1</sup>H NMR (300 MHz, CDCl<sub>3</sub>) δ 1.25 (t, 3H, *J* = 7.3 Hz), 2.13-2.41 (m, 3H), 3.40-3.59 (m, 3H), 3.74-3.87 (m, 2H), 3.90 (s, 3H), 4.72 (d, 1H, *J* = 7.8 Hz), 7.14 (dd, 1H, *J* = 8.7 Hz, 3.0 Hz), 7.28 (d, 1H, *J* = 8.7 Hz), 7.48-7.50 (bm, 1H), 7.58 (d, 1H, *J* = 2.7 Hz), 7.69 (s, 1H); <sup>13</sup>C NMR (75 MHz, CDCl<sub>3</sub>) δ 14.9, 24.6, 28.8, 34.0, 46.7, 53.6, 55.8, 114.4, 119.6, 124.5, 126.3, 130.3, 130.7, 134.5, 135.2, 159.3, 162.0, 163.8; HRMS (ESI) (M+H)<sup>+</sup>, calcd. for C<sub>18</sub>H<sub>21</sub>N<sub>4</sub>O<sub>3</sub> 341.1608; Found 341.1601.

(*S*)-*N*-Ethyl-7-(<sup>2</sup>H<sub>3</sub>)-methoxy-9-oxo-11,12,13,13a-tetrahydro-9H-benzo[*e*]imidazo[5,1-*c*]pyrrolo[1,2-*a*][1,4]diazepine-1-carboxamide (**17a**): The *N*-ethyl amide **17a** was prepared from **9a** following the general procedure with a solution of ethylamine (2.0 M in THF, 1 mL) as the nucleophile. The crude residue was purified by flash column chromatography [Neutral alumina, EtOAc/hexane (8:2)] to yield pure amide **17a** as a solid in 96 % yield: M.p = 176-177 °C; <sup>1</sup>H NMR (300 MHz, CDCl<sub>3</sub>) δ 1.25 (t, 3H, *J* = 7.3 Hz), 2.12-2.24 (m, 2H), 2.30-2.42 (m, 1H), 3.40-3.60 (m, 3H), 3.74-3.91 (m, 2H), 4.72 (d, 1H, *J* = 7.7 Hz), 7.14 (dd, 1H, *J* = 8.8 Hz, 2.9 Hz), 7.29 (d, 1H, *J* = 8.8 Hz), 7.47-7.53 (bm, 1H), 7.58 (d, 1H, *J* = 2.9 Hz), 7.70 (s, 1H); <sup>13</sup>C NMR (75 MHz, CDCl<sub>3</sub>) δ 14.9, 24.6, 28.8, 34.0, 46.7, 53.6, 114.4, 119.6, 124.5, 126.4, 130.4, 130.7, 134.6, 135.2, 159.3, 162.1, 163.8; HRMS (ESI) (M+H)<sup>+</sup>, calcd. for C<sub>18</sub>H<sub>18</sub><sup>2</sup>H<sub>3</sub>N<sub>4</sub>O<sub>3</sub> 344.1796; Found 344.1797.

(*S*)-*N*-(*tert*-Butyl)-7-methoxy-9-oxo-11,12,13,13a-tetrahydro-9H-benzo[*e*]imidazo[5,1-*c*]pyrrolo[1,2-*a*][1,4]diazepine-1-carboxamide (**18**): The *N*-*tert*-butyl amide **18** was prepared from acid **9** following the general procedure with *tert*-butyl amine as the nucleophile. The crude residue was purified by flash column chromatography [neutral alumina, EtOAc/hexane (8:2)] to yield pure amide **18** as a solid in 80 % yield: M.p = 152-154 °C;  $[\alpha]_{\text{D}}^{27} = +170.00$  (c 0.10%, in CH<sub>2</sub>Cl<sub>2</sub>); <sup>1</sup>H NMR (300 MHz, CDCl<sub>3</sub>) δ 1.47 (s, 9H), 2.11-2.37 (m, 3H), 3.50-3.60 (m, 1H), 3.74-3.86 (m, 2H), 3.91 (s, 3H), 4.71 (d, 1H, *J* = 7.8 Hz), 7.14 (dd, 1H, *J* = 8.7 Hz, 3.0 Hz), 7.26-7.29 (m, 1H), 7.45 (bs, 1H), 7.58 (d, 1H, *J* = 3.0 Hz), 7.77 (s, 1H); <sup>13</sup>C NMR (75 MHz, CDCl<sub>3</sub>) δ 24.5, 28.8, 46.7, 50.9, 53.6, 55.8, 114.4, 119.6, 124.6, 126.3, 130.7, 131.2, 134.3, 134.9, 159.2, 161.5, 163.8; HRMS (ESI) (M+H)<sup>+</sup>, calcd. for C<sub>20</sub>H<sub>25</sub>N<sub>4</sub>O<sub>3</sub> 369.1921; Found 369.1920.

(*S*)-*N*-(*tert*-Butyl)-7-(<sup>2</sup>H<sub>3</sub>)-methoxy-9-oxo-11,12,13,13a-tetrahydro-9H-benzo[*e*]imidazo[5,1-*c*]pyrrolo[1,2-*a*][1,4]diazepine-1-carboxamide (**18a**): The *N*-*tert*-butyl amide **18a** was prepared from acid **9a** following the general procedure with *tert*-butyl amine as the nucleophile. The crude residue was purified by flash column chromatography [neutral alumina, EtOAc/hexane (8:2)] to yield pure amide **18a** as a solid in 85% yield: M.p = 153-155 °C; <sup>1</sup>H NMR (300 MHz, CDCl<sub>3</sub>) δ 1.49 (s, 9H), 2.12-2.39 (m, 3H), 3.51-3.61 (m, 1H), 3.75-3.94 (m, 2H), 4.73 (d, 1H, *J* = 7.9 Hz), 7.14 (dd, 1H, *J* = 8.8 Hz, 2.9 Hz), 7.27-7.30 (m, 1H), 7.39 (bs, 1H), 7.59 (d, 1H, *J* = 2.9 Hz), 7.68 (s, 1H); <sup>13</sup>C NMR (75 MHz, CDCl<sub>3</sub>) δ 24.6, 28.9, 46.7, 50.9, 53.7, 114.4, 119.7, 124.5, 126.5, 130.7, 131.4, 134.3, 134.8, 159.3, 161.7, 163.8; HRMS (ESI) (M+H)<sup>+</sup>, calcd. for C<sub>20</sub>H<sub>21</sub><sup>2</sup>H<sub>3</sub>N<sub>4</sub>O<sub>3</sub> 372.2108; Found 372.2109.

*(S)*-*N*-Cyclopropyl-7-methoxy-9-oxo-11,12,13,13a-tetrahydro-9H-benzo[e]imidazo[5,1-c]pyrrolo[1,2-a][1,4]diazepine-1-carboxamide (**19**): The *N*-cyclopropyl amide **19** was prepared from acid **9** following the general procedure with dry cyclopropylamine as the nucleophile. The crude residue was purified by flash column chromatography [neutral alumina, EtOAc/hexane (1:1)] to yield pure amide **19** as a solid in 82% yield: M.p = 189-190 °C;  $[\alpha]_D^{25} = -6.67$  (c 0.3%, in CH<sub>2</sub>Cl<sub>2</sub>); <sup>1</sup>H NMR (300 MHz, CDCl<sub>3</sub>) δ 0.54-0.59 (m, 2H), 0.76-0.82 (m, 2H), 2.06-2.18 (m, 2H), 2.25-2.36 (m, 1H), 2.75-2.81 (m, 1H), 3.43-3.53 (m, 1H), 3.68-3.81 (m, 2H), 3.84 (s, 3H), 4.65 (d, 1H, *J* = 8.1 Hz), 7.07 (dd, 1H, *J* = 8.7 Hz, 2.8 Hz), 7.19-7.22 (m, 1H), 7.50 (bs, 1H), 7.52 (d, 1H, *J* = 2.8 Hz), 7.61 (s, 1H); <sup>13</sup>C NMR (75 MHz, CDCl<sub>3</sub>) δ 6.5, 6.6, 22.3, 24.6, 28.8, 46.6, 53.6, 55.8, 114.4, 119.6, 124.4, 126.3, 130.0, 130.7, 134.5, 135.3, 159.3, 163.7, 163.8; HRMS (ESI) (M+Na)<sup>+</sup>, calcd. for C<sub>19</sub>H<sub>20</sub>N<sub>4</sub>O<sub>3</sub>Na 375.1433; Found 375.1440.

*(S)*-*N*-Cyclopropyl-7-(<sup>2</sup>H<sub>3</sub>)-methoxy-9-oxo-11,12,13,13a-tetrahydro-9H-benzo[e]imidazo[5,1-c]pyrrolo[1,2-a][1,4]diazepine-1-carboxamide (**19a**): The *N*-cyclopropyl amide **19a** was prepared from acid **9a** following the general procedure with dry cyclopropylamine as the nucleophile. The crude residue was purified by column chromatography [neutral alumina, EtOAc/hexane (1:1)] to yield pure amide **19a** as a solid in 86% yield: M.p = 189-190 °C; <sup>1</sup>H NMR (300 MHz, CDCl<sub>3</sub>) δ 0.62-0.67 (m, 2H), 0.84-0.90 (m, 2H), 2.12-2.26 (m, 2H), 2.33-2.46 (m, 1H), 2.83-2.89 (m, 1H), 3.51-3.60 (m, 1H), 3.75-3.93 (m, 2H), 4.73 (d, 1H, *J* = 8.2 Hz), 7.15 (dd, 1H, *J* = 8.8 Hz, 2.9 Hz), 7.27-7.31 (m, 1H), 7.57-7.60 (m, 2H), 7.69 (s, 1H); <sup>13</sup>C NMR (75 MHz, CDCl<sub>3</sub>) δ 6.5, 6.6, 22.3, 24.7, 28.8, 46.7, 53.6, 114.4, 119.7, 124.5, 126.3, 130.1, 130.8, 134.6, 135.3, 159.3, 163.7, 163.8; HRMS (ESI) (M+H)<sup>+</sup>, calcd. for C<sub>19</sub>H<sub>18</sub><sup>2</sup>H<sub>3</sub>N<sub>4</sub>O<sub>3</sub> 356.1796; Found 356.1796.



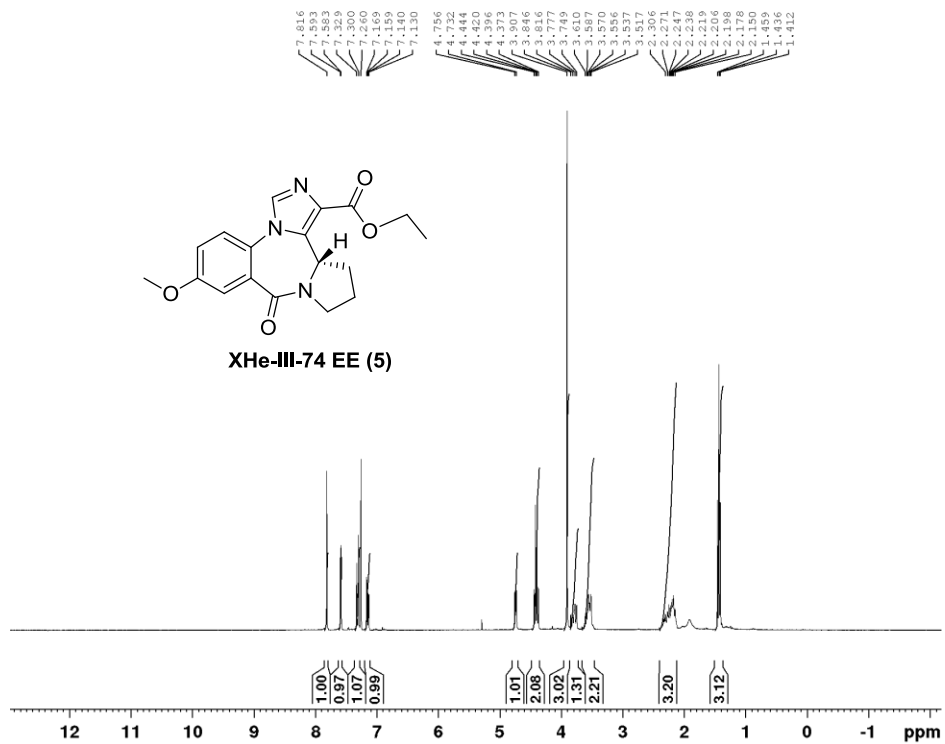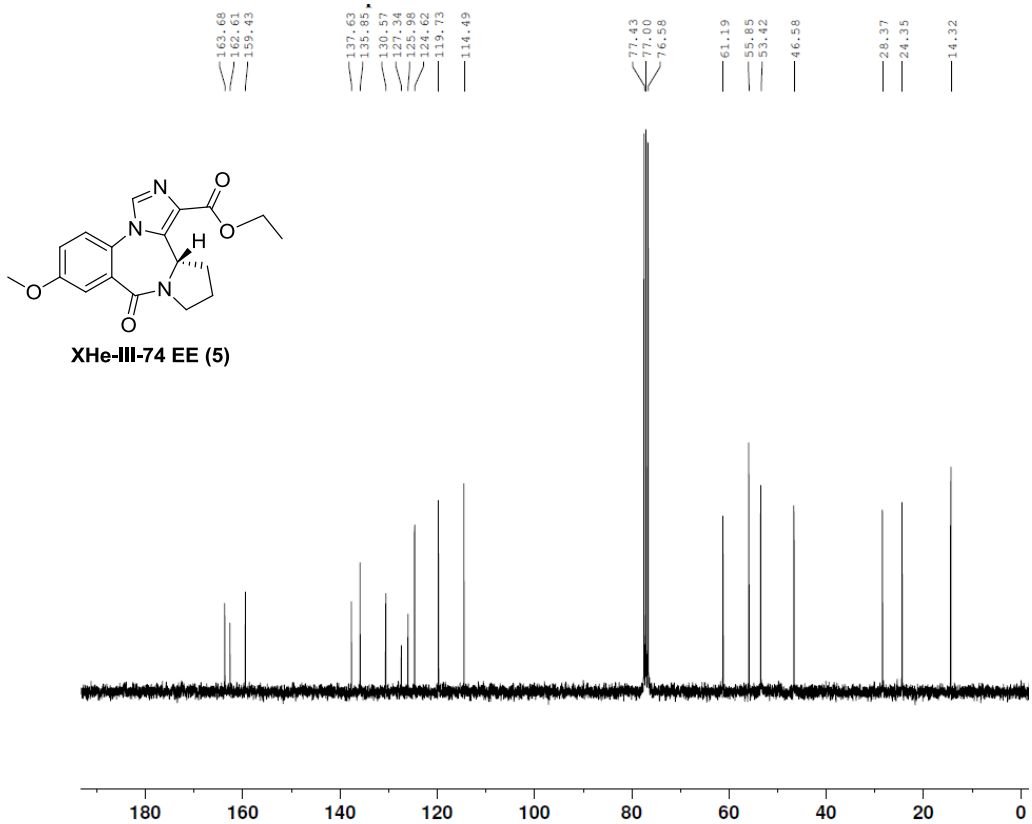

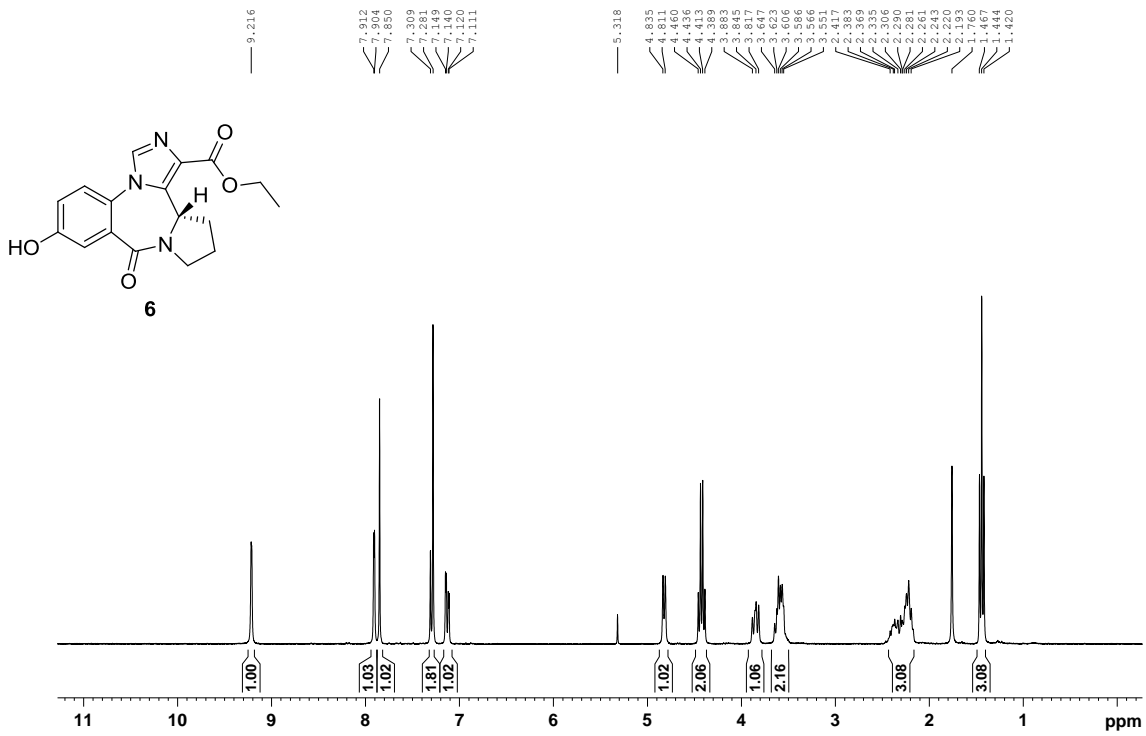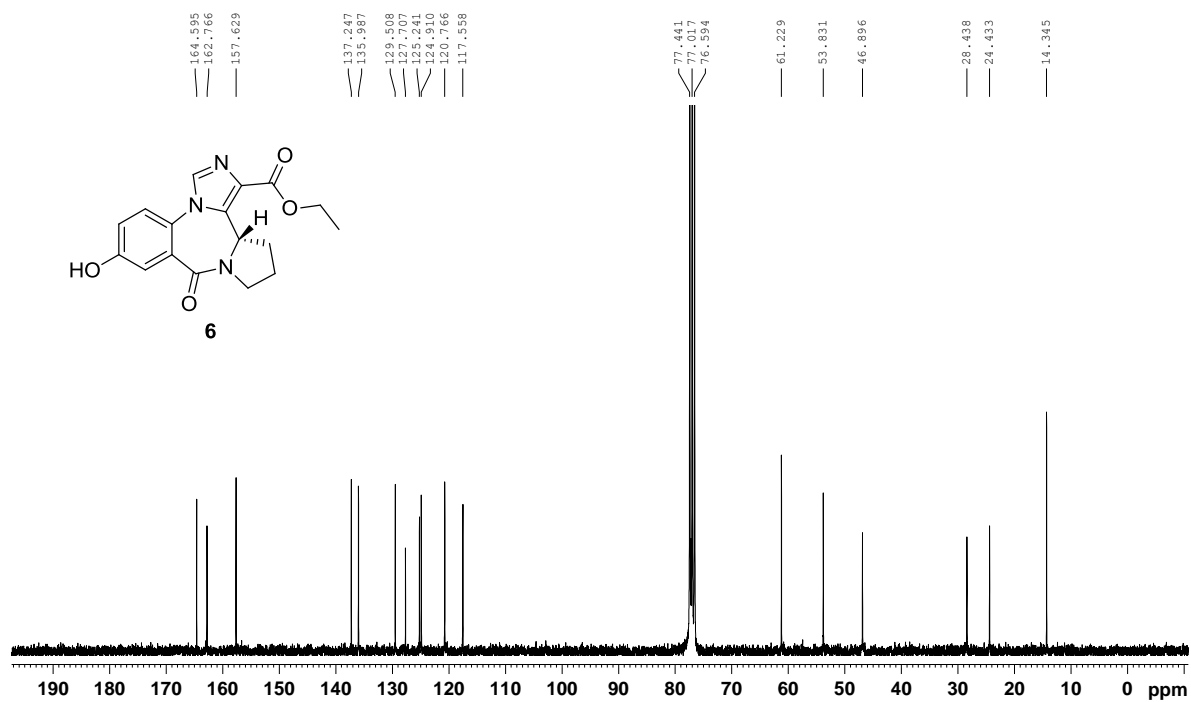

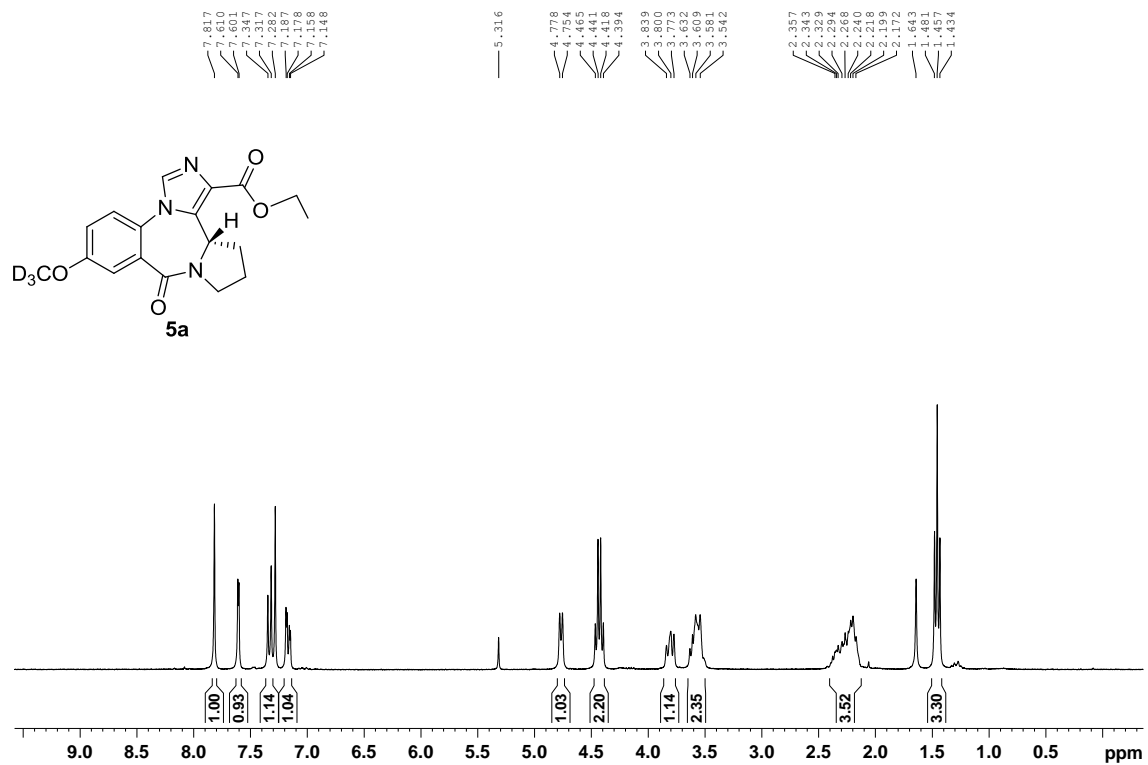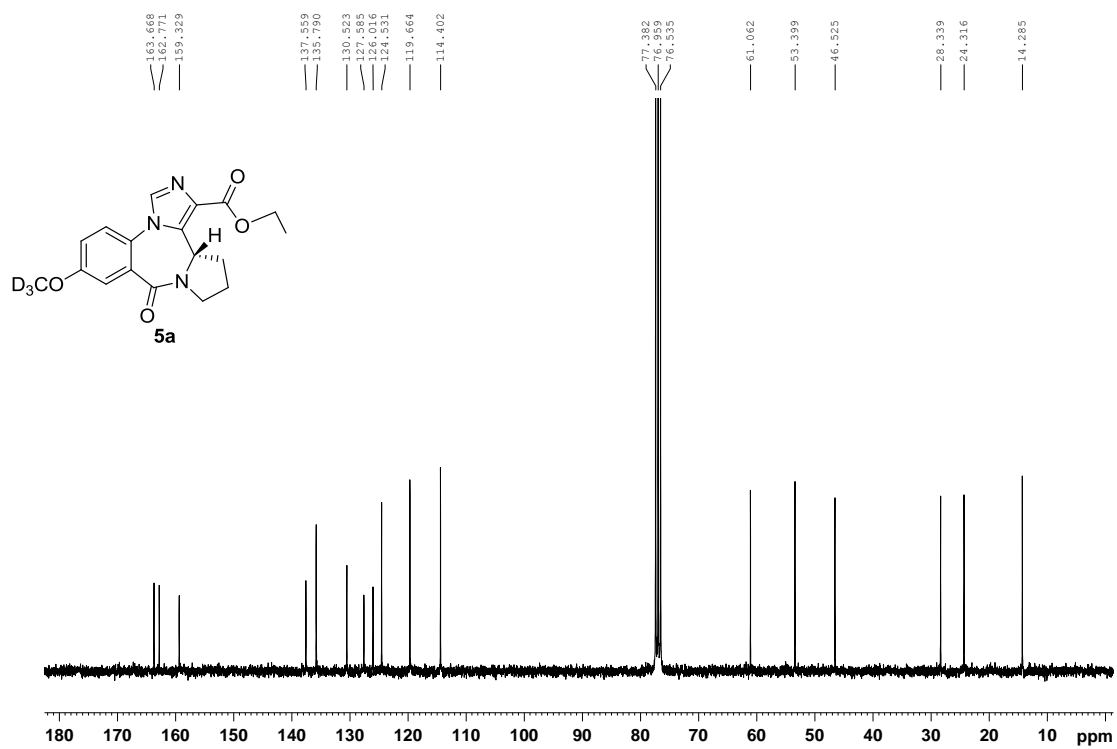

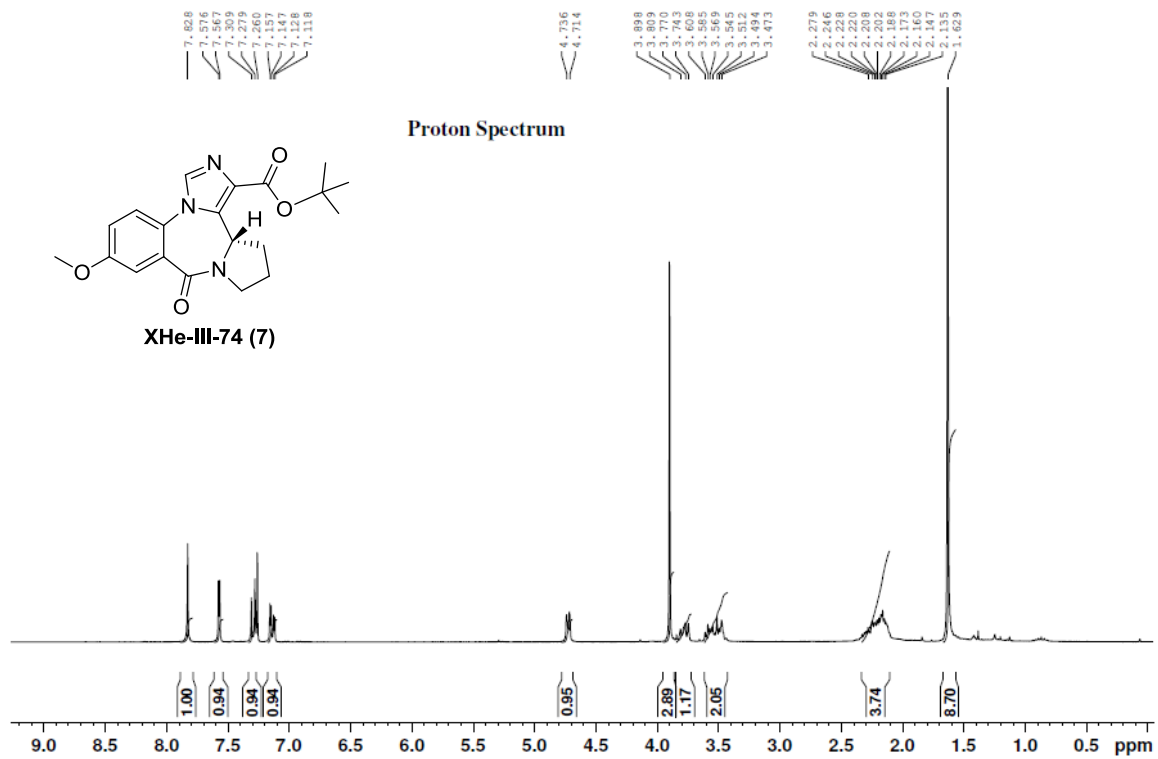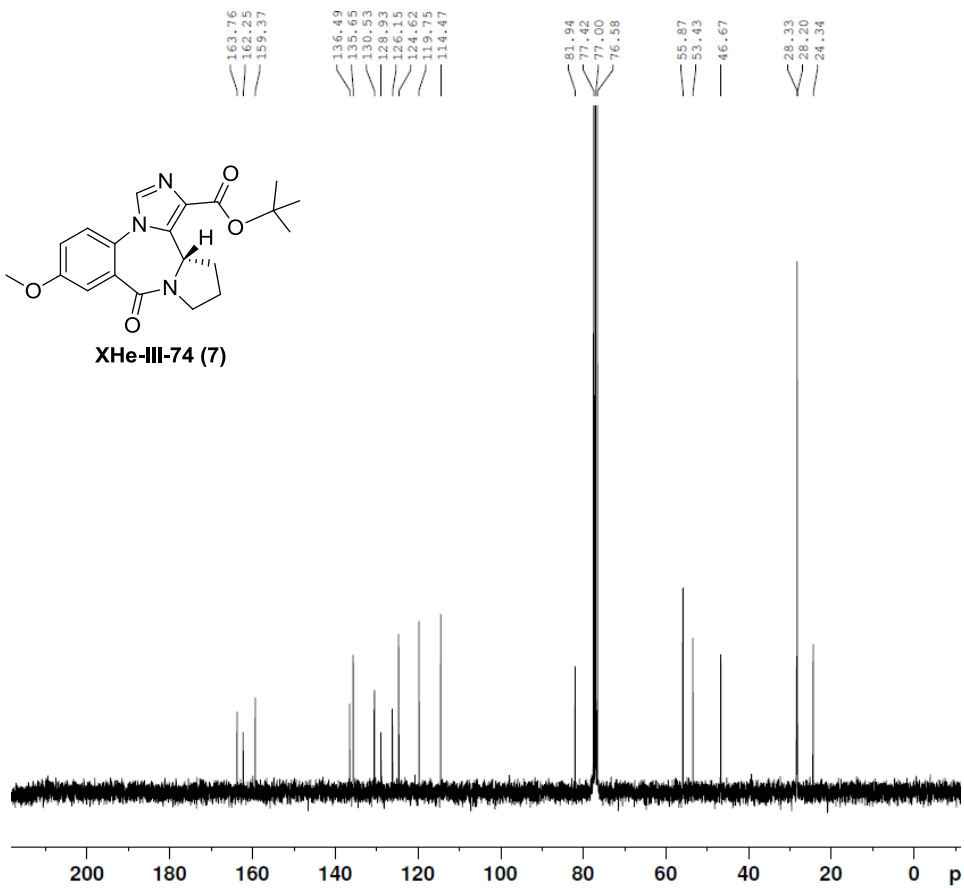

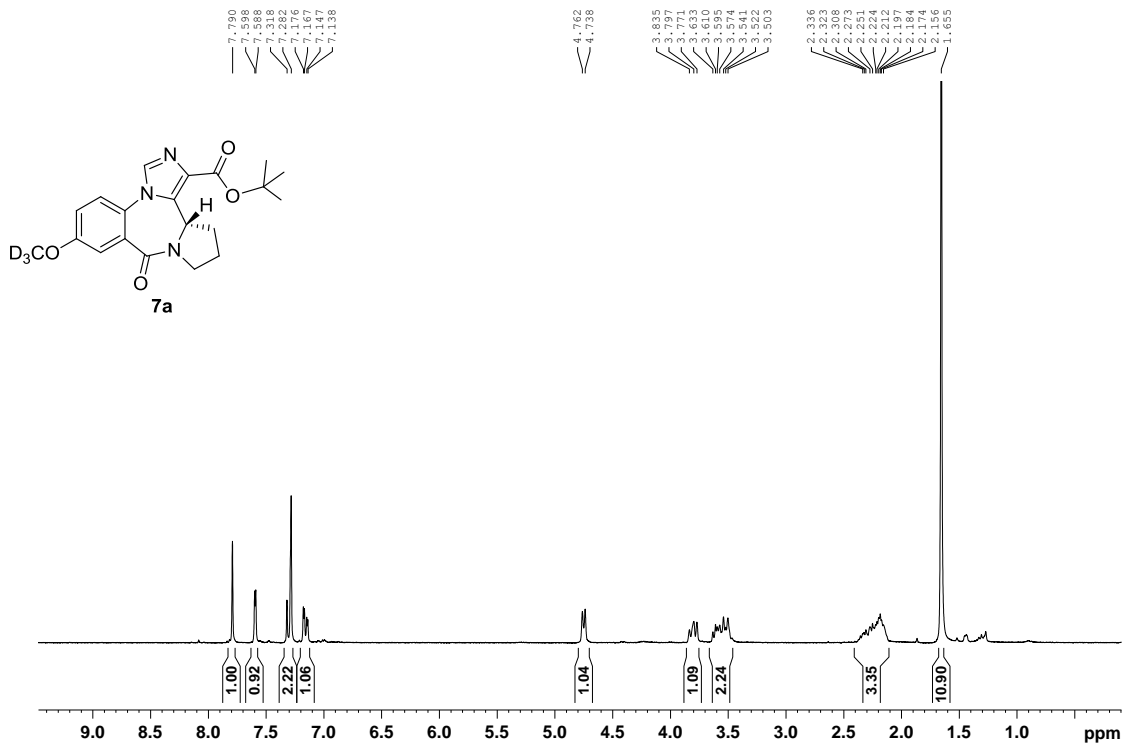

$^2\text{H}$ -NMR

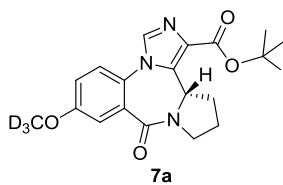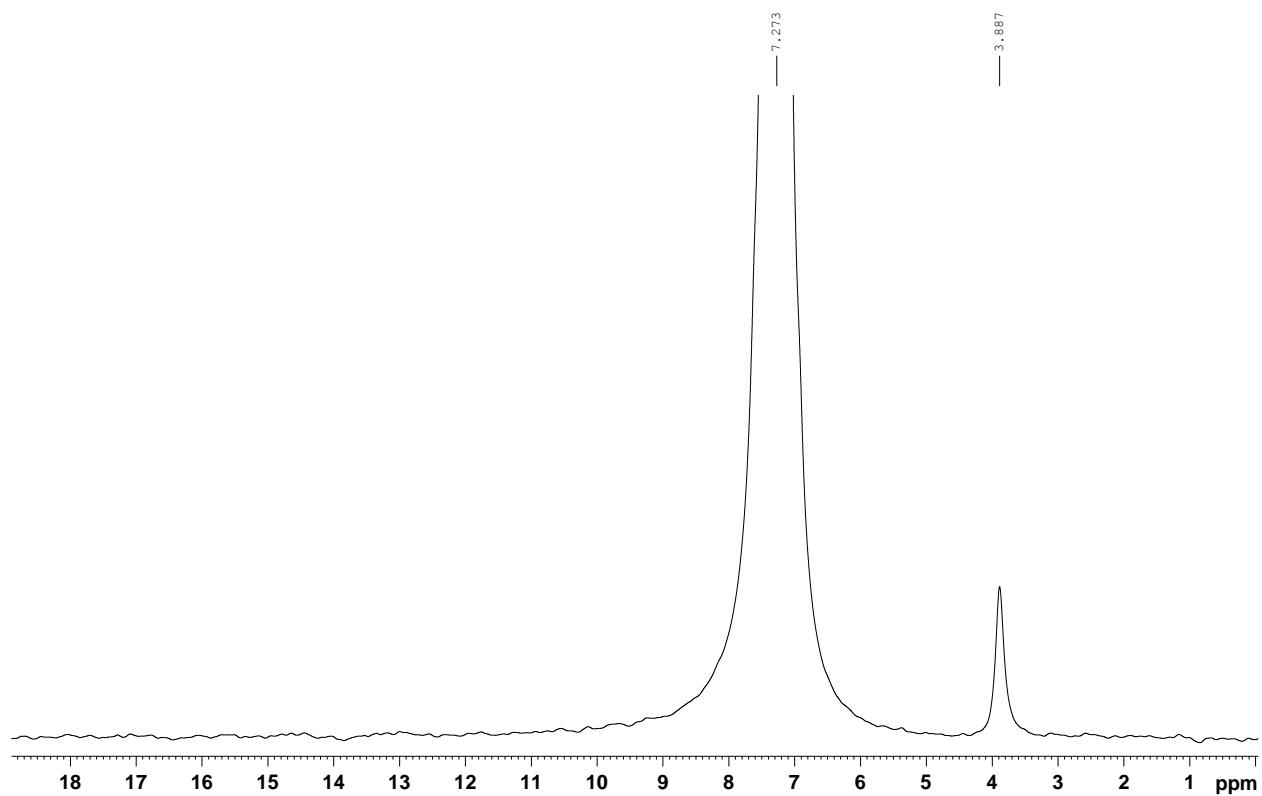

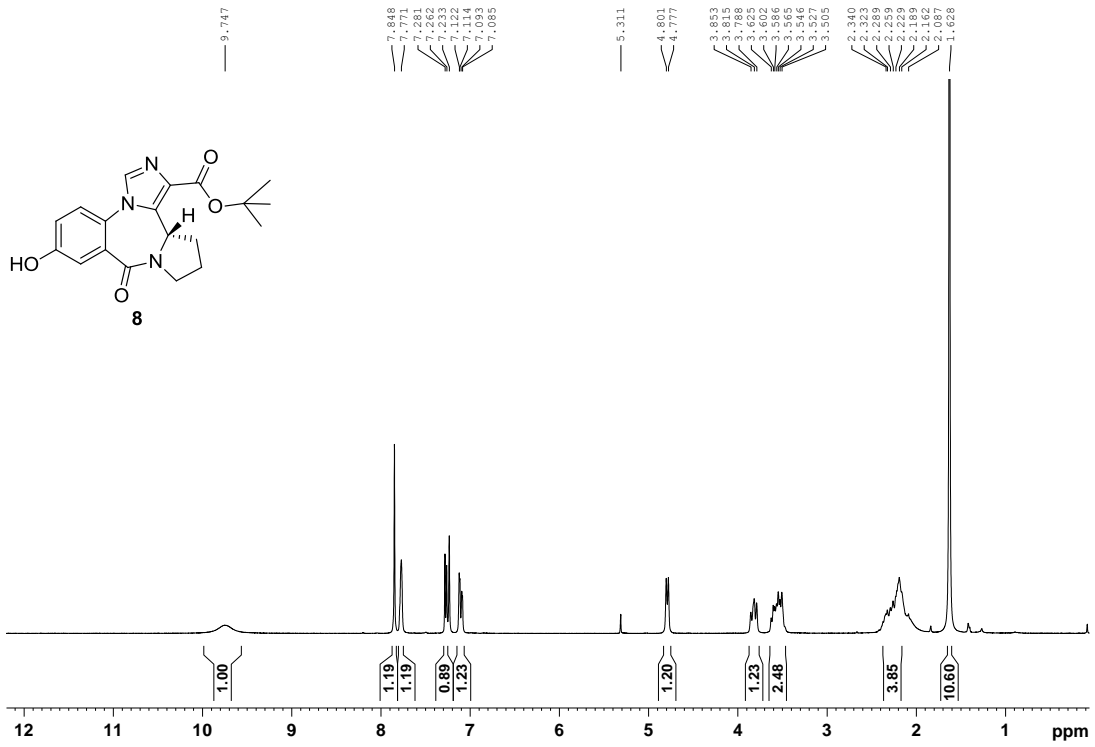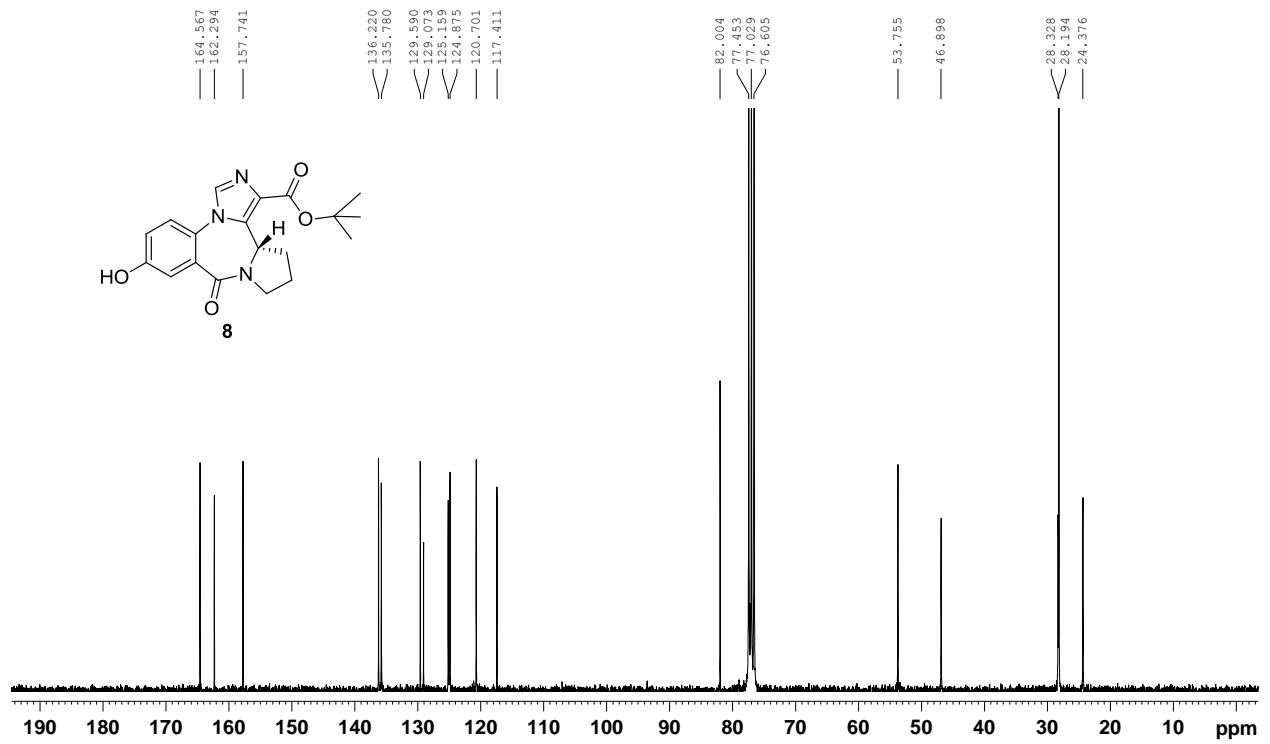

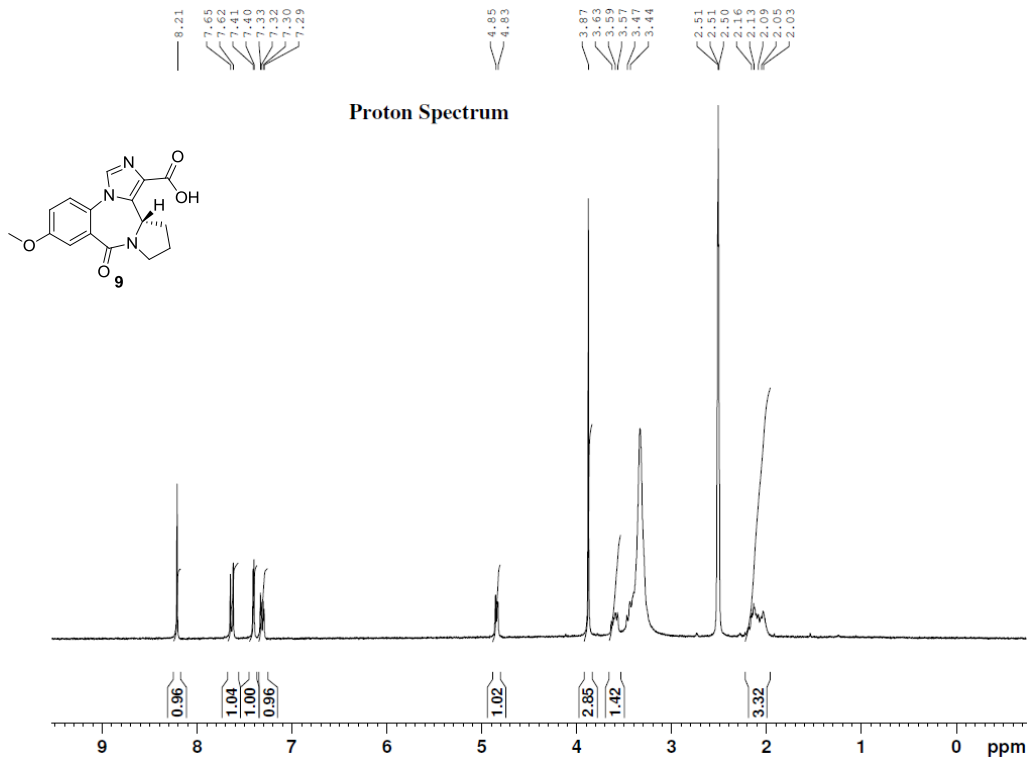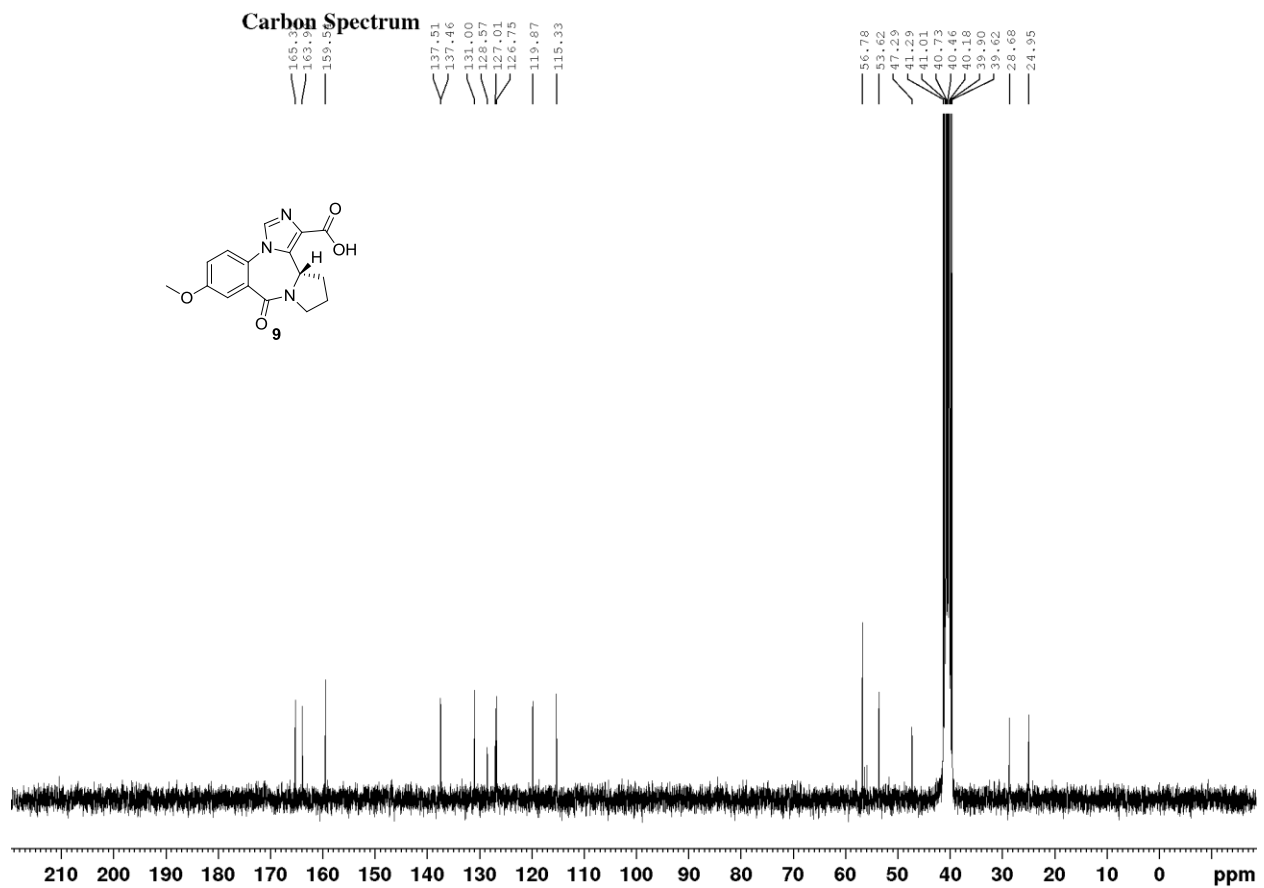



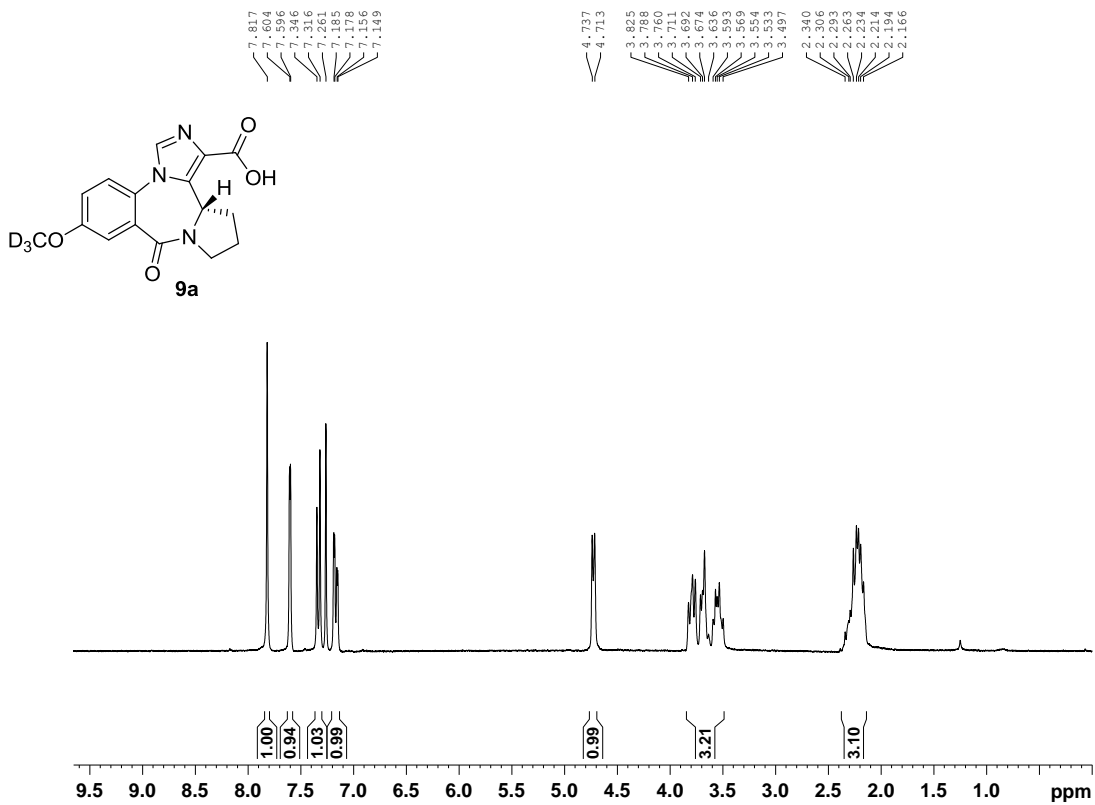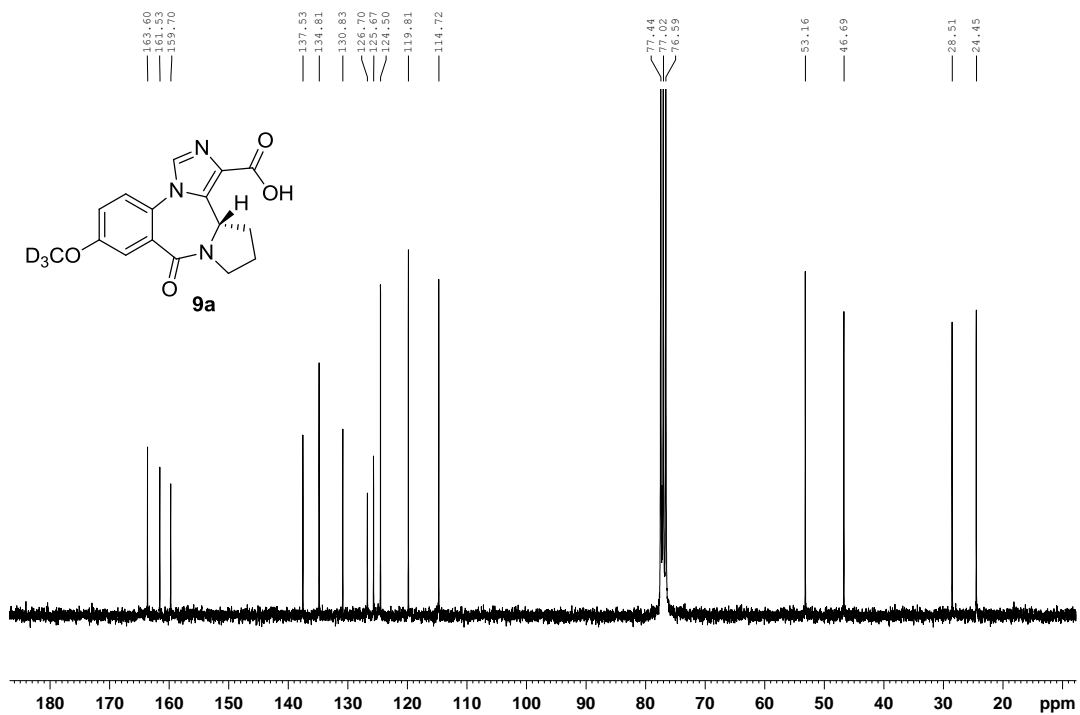

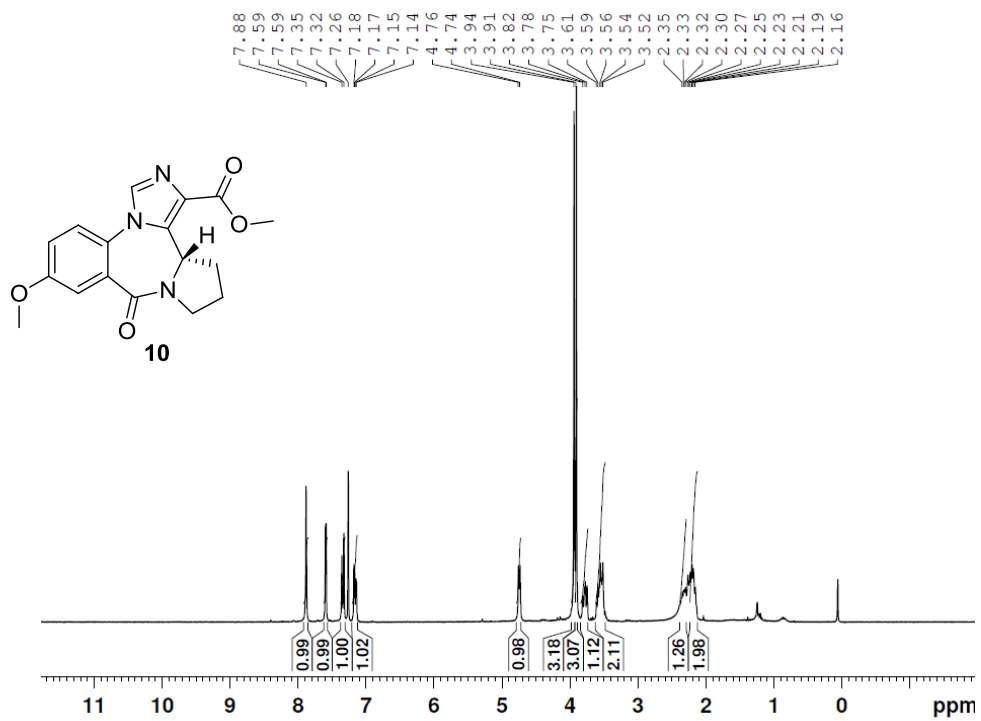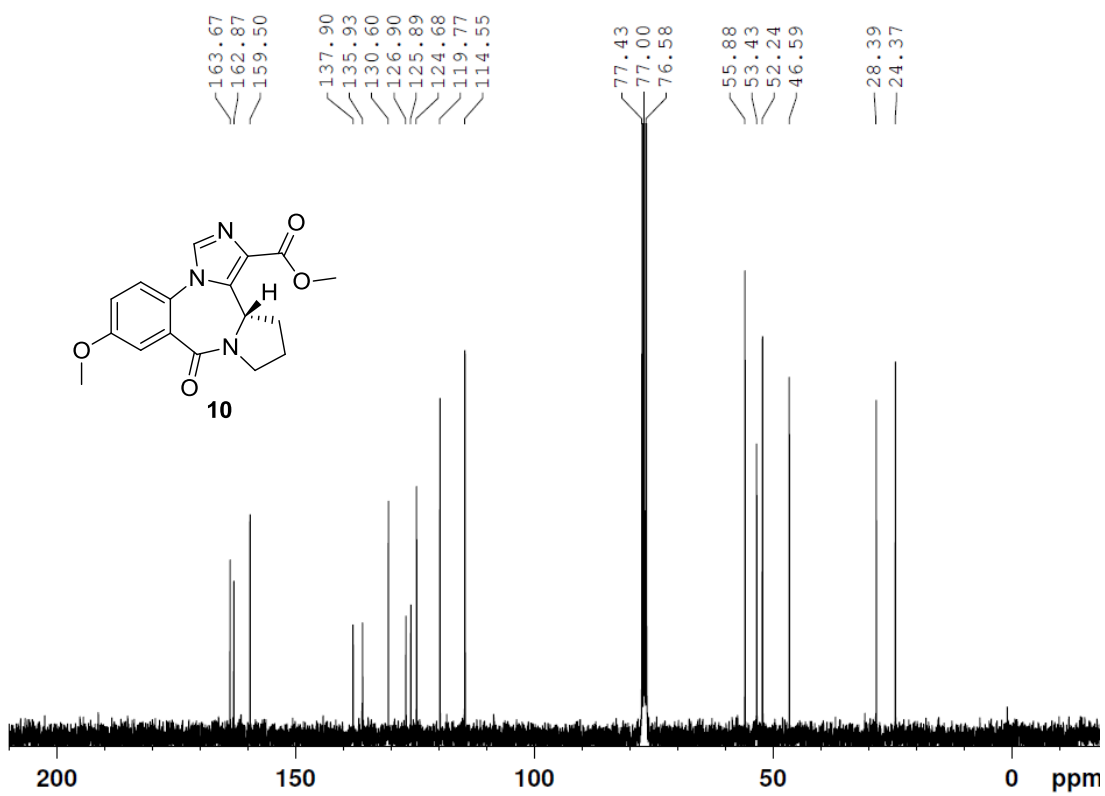

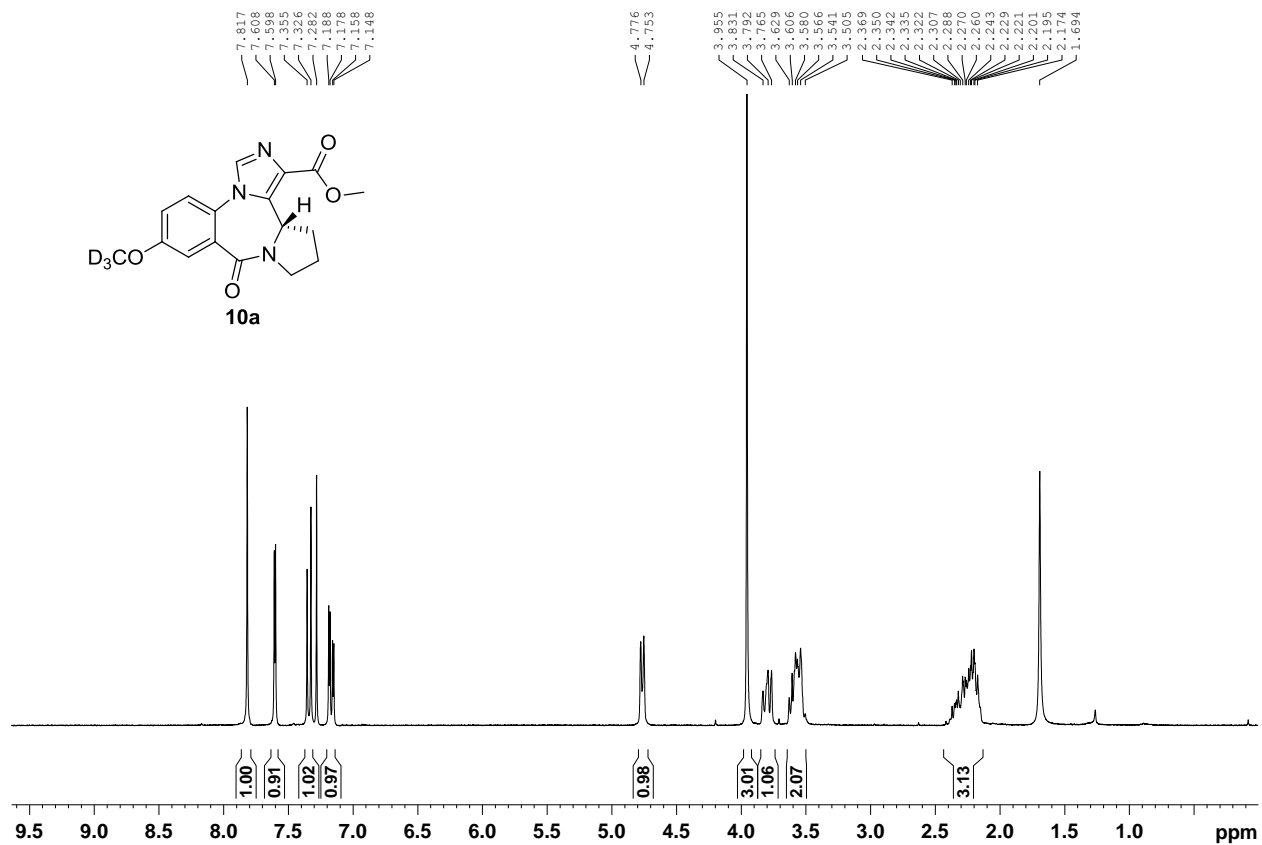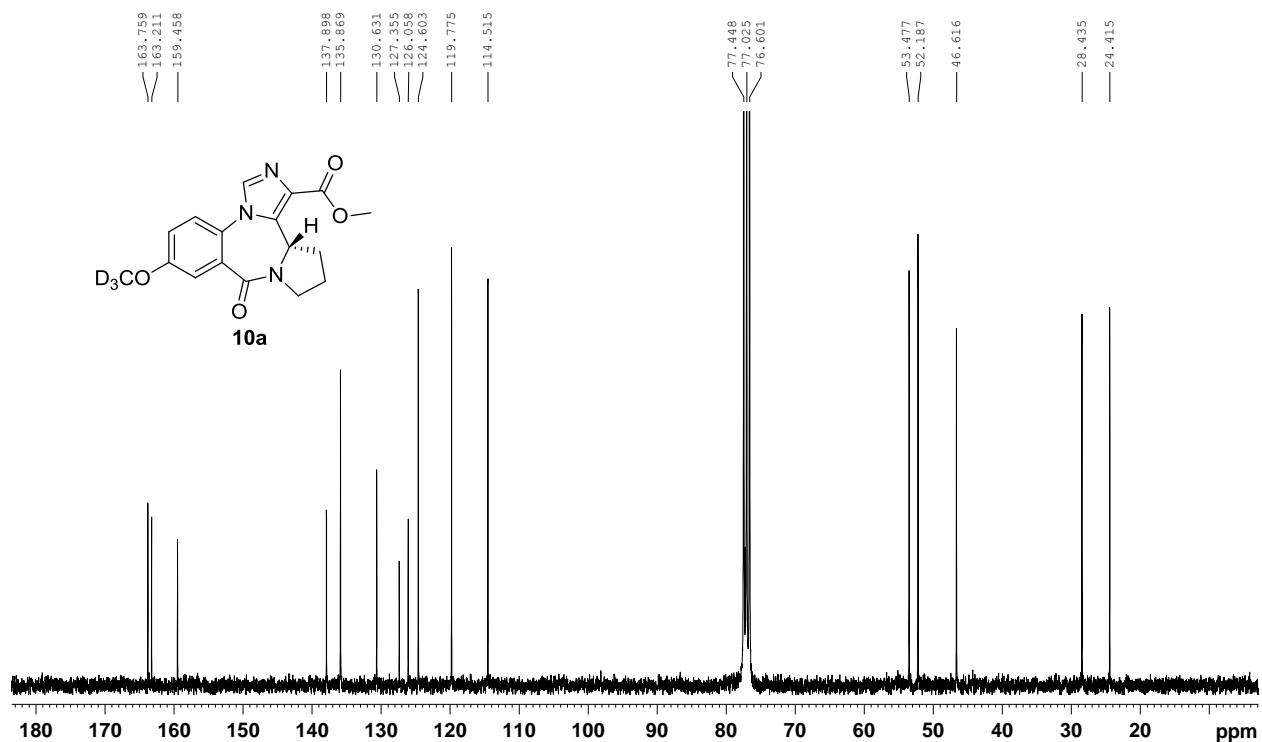

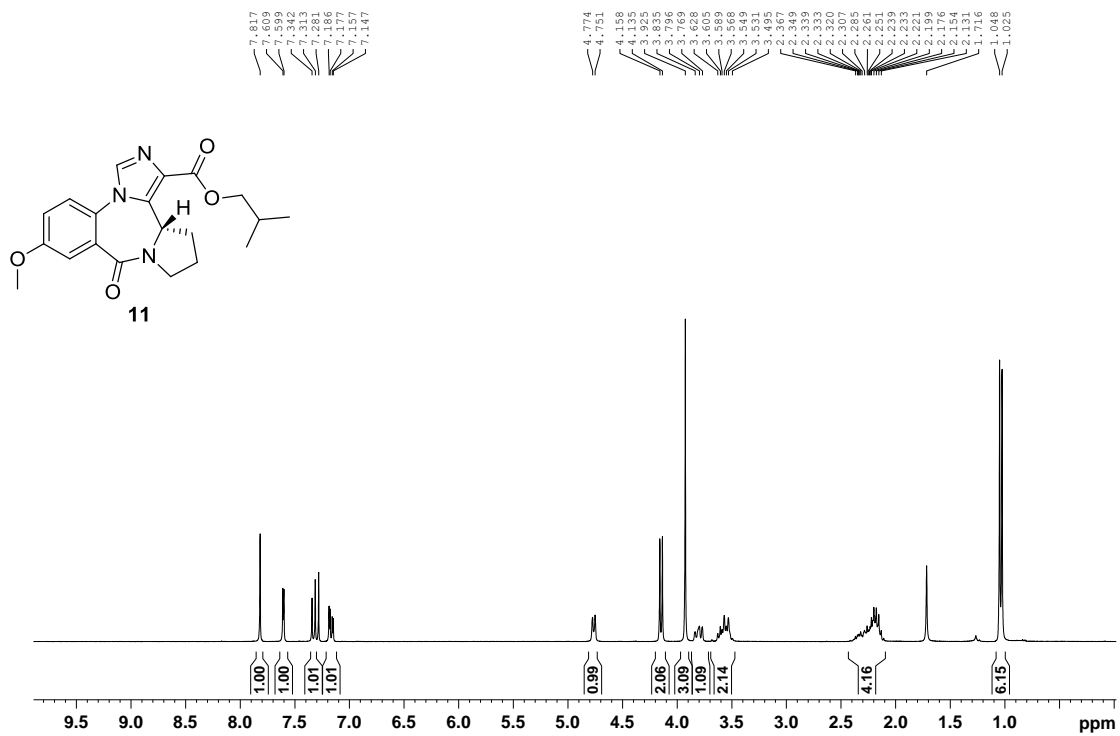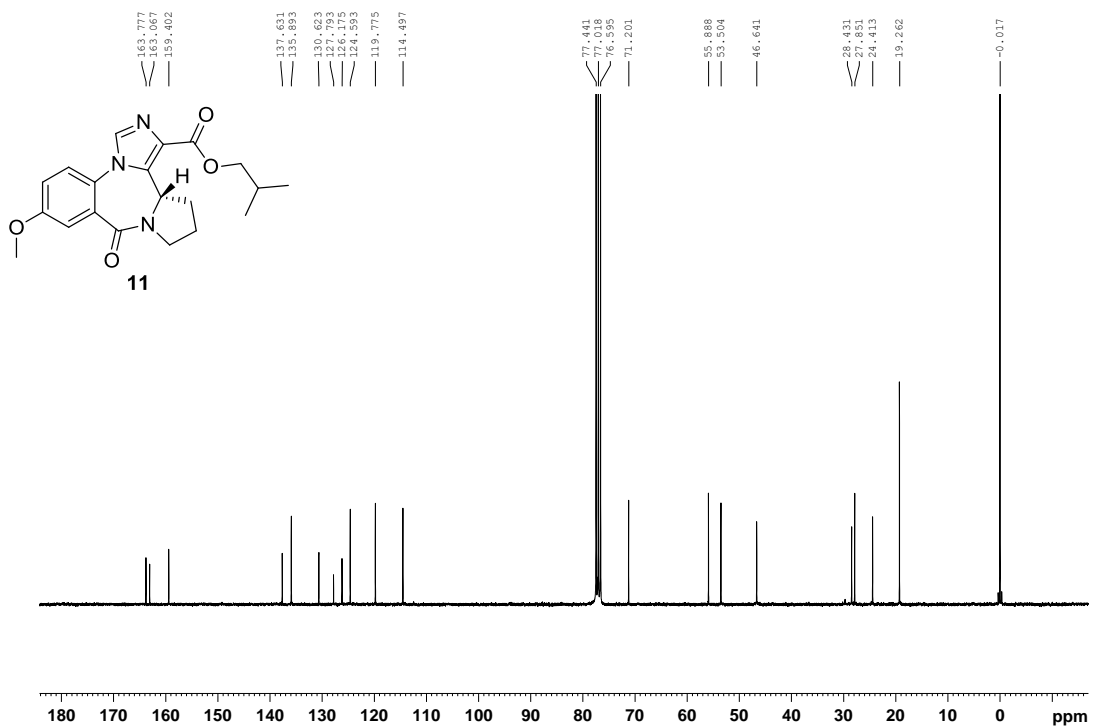

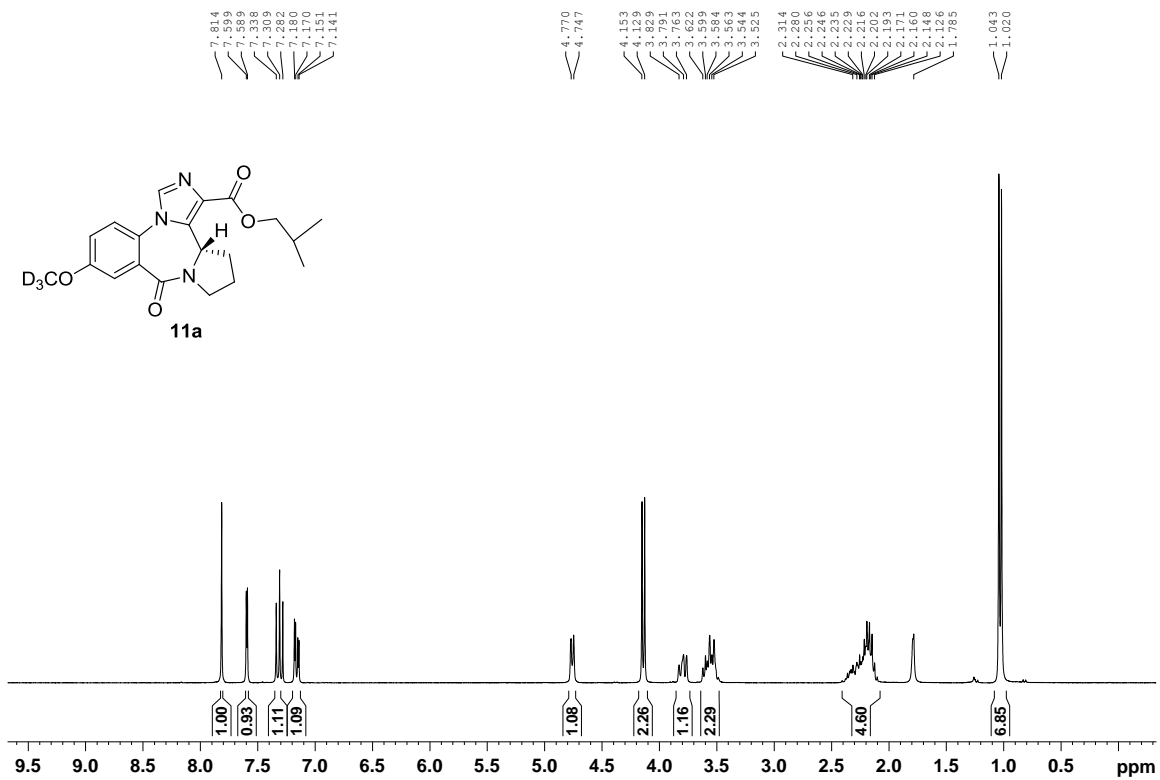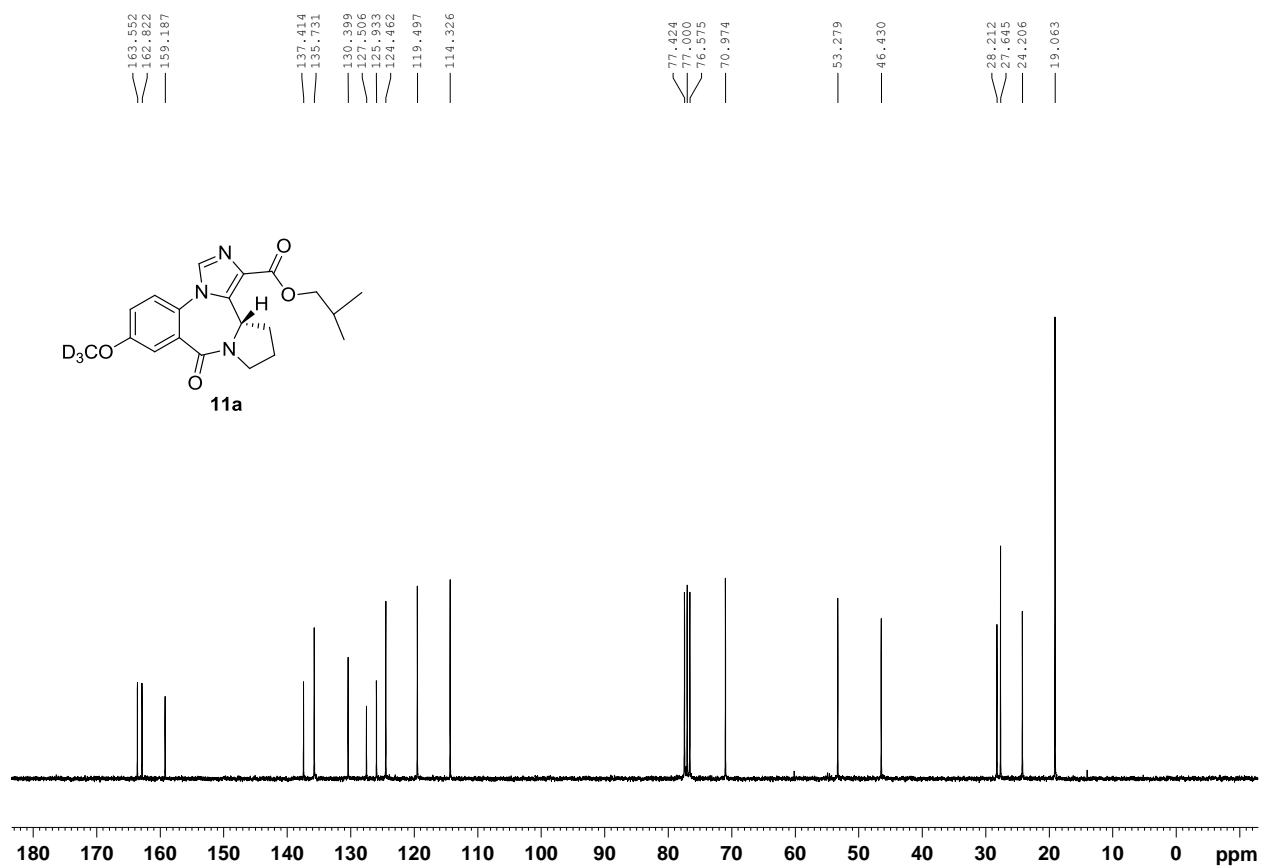

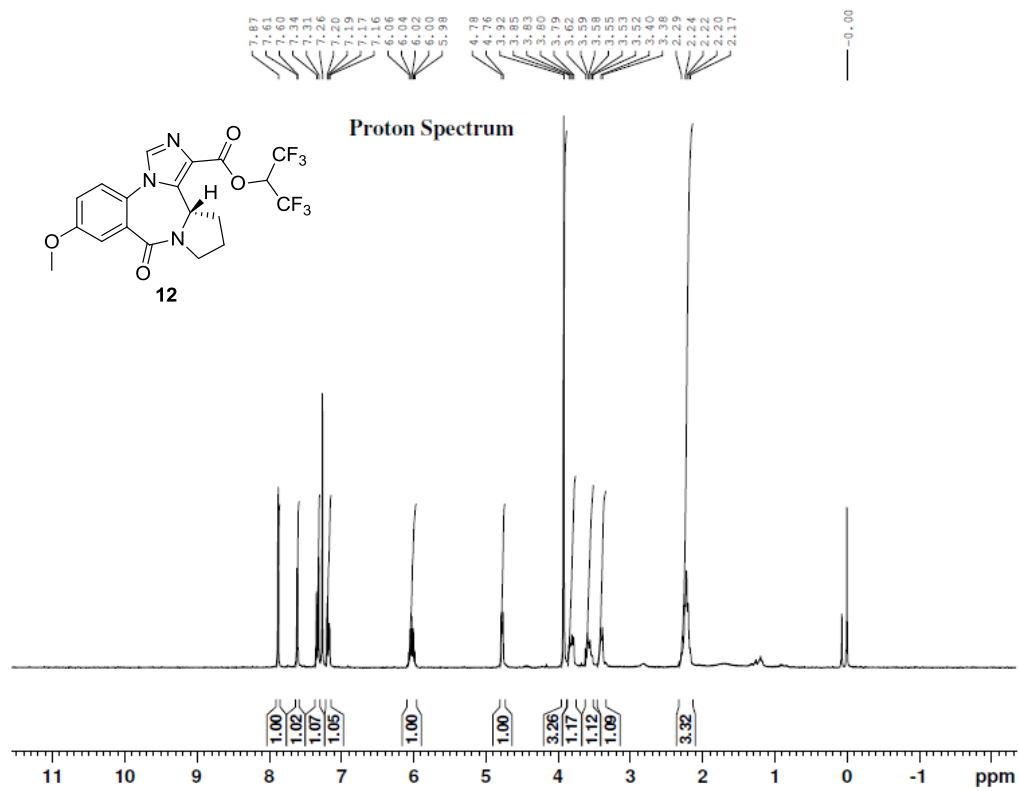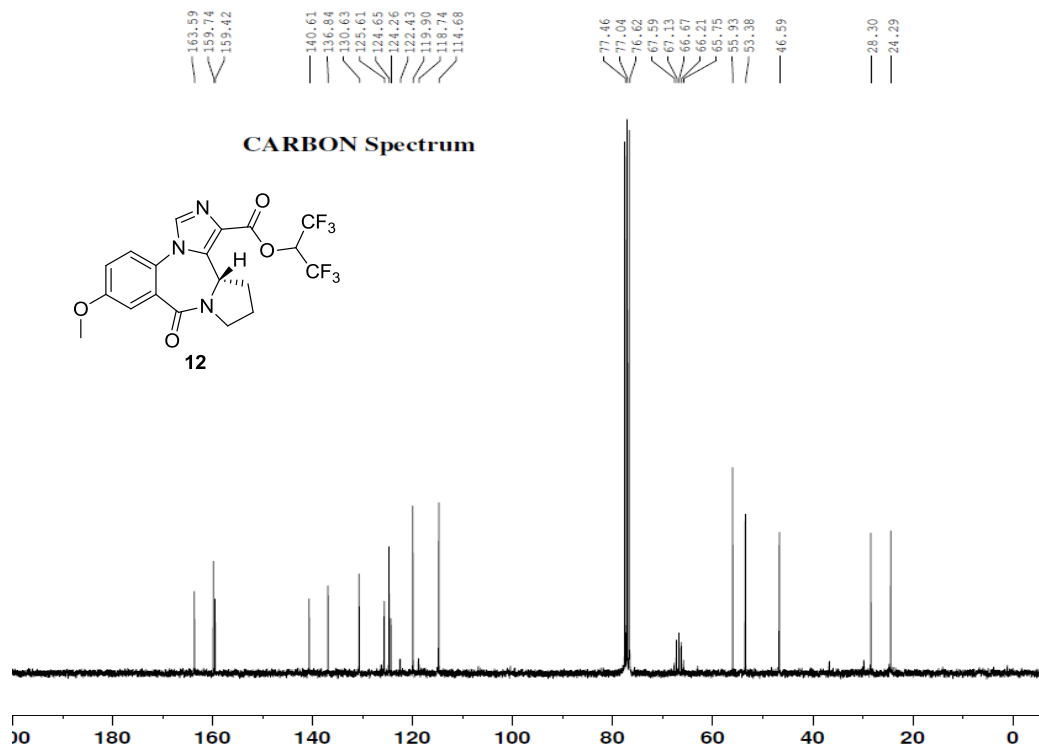

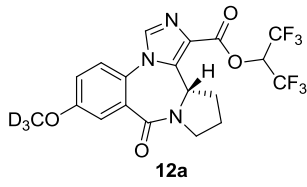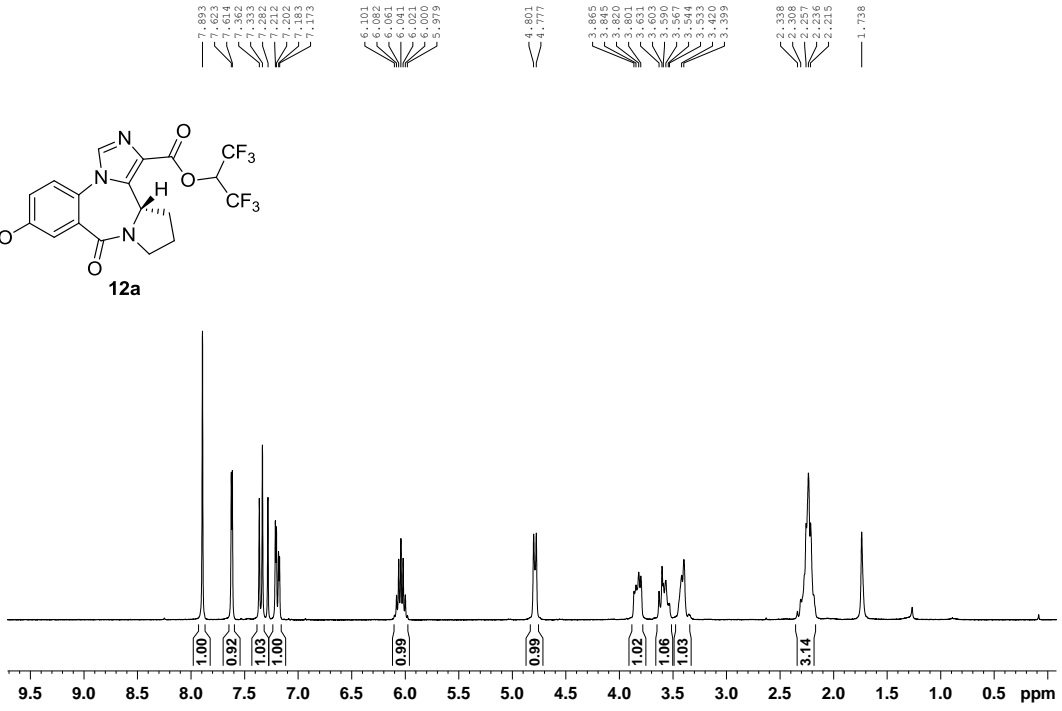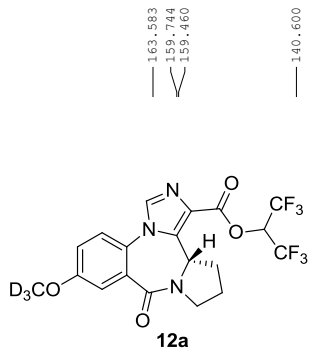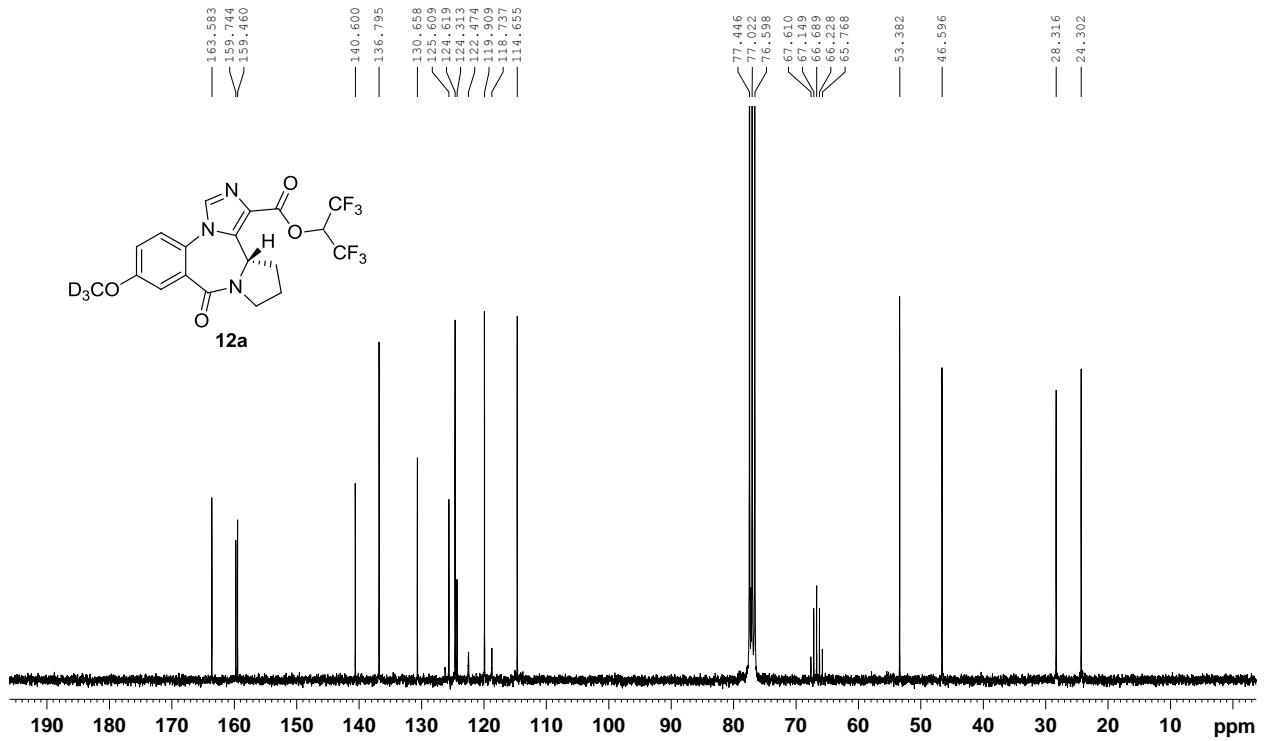

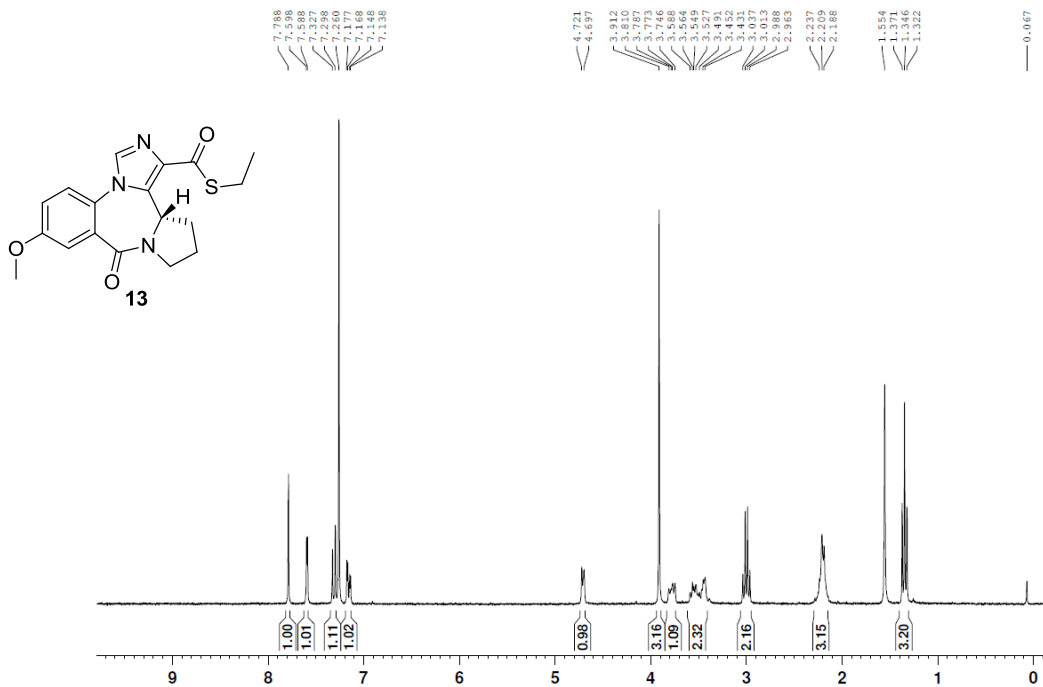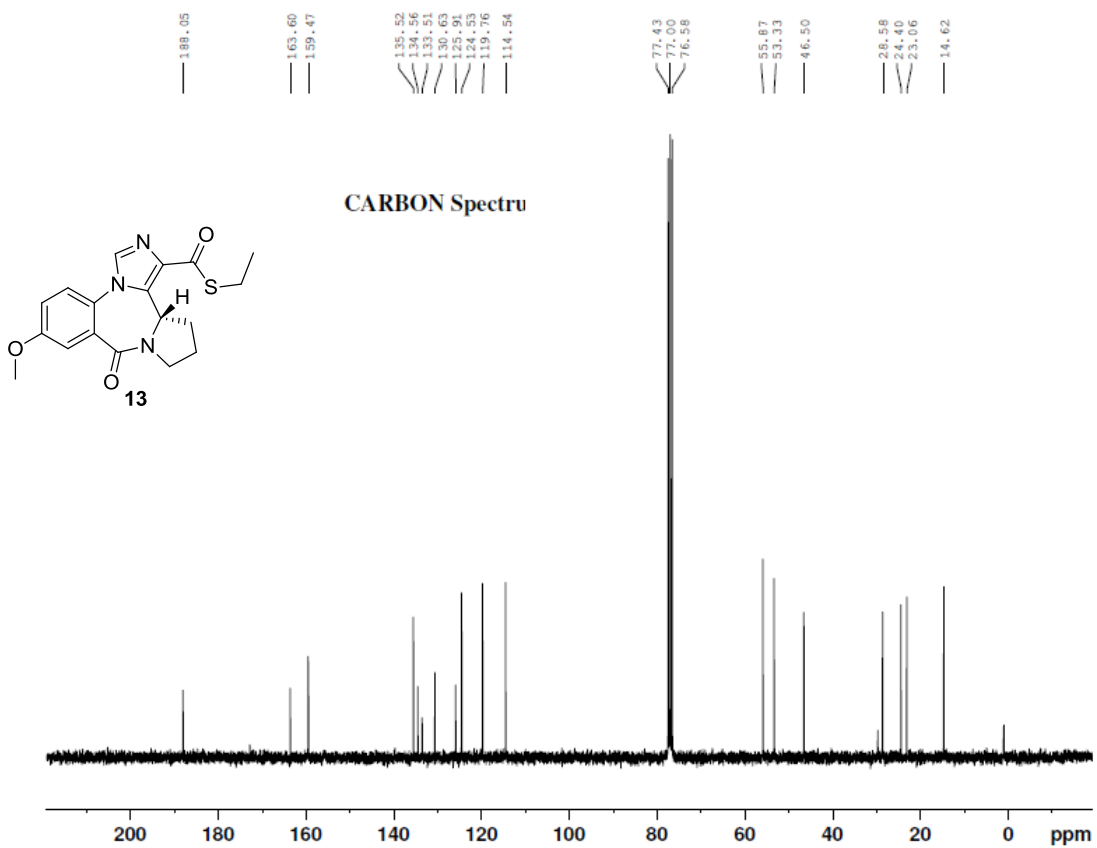



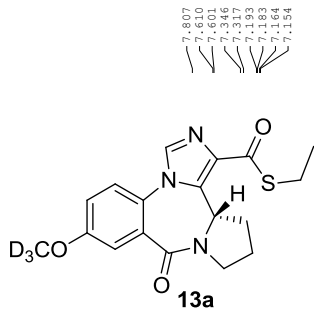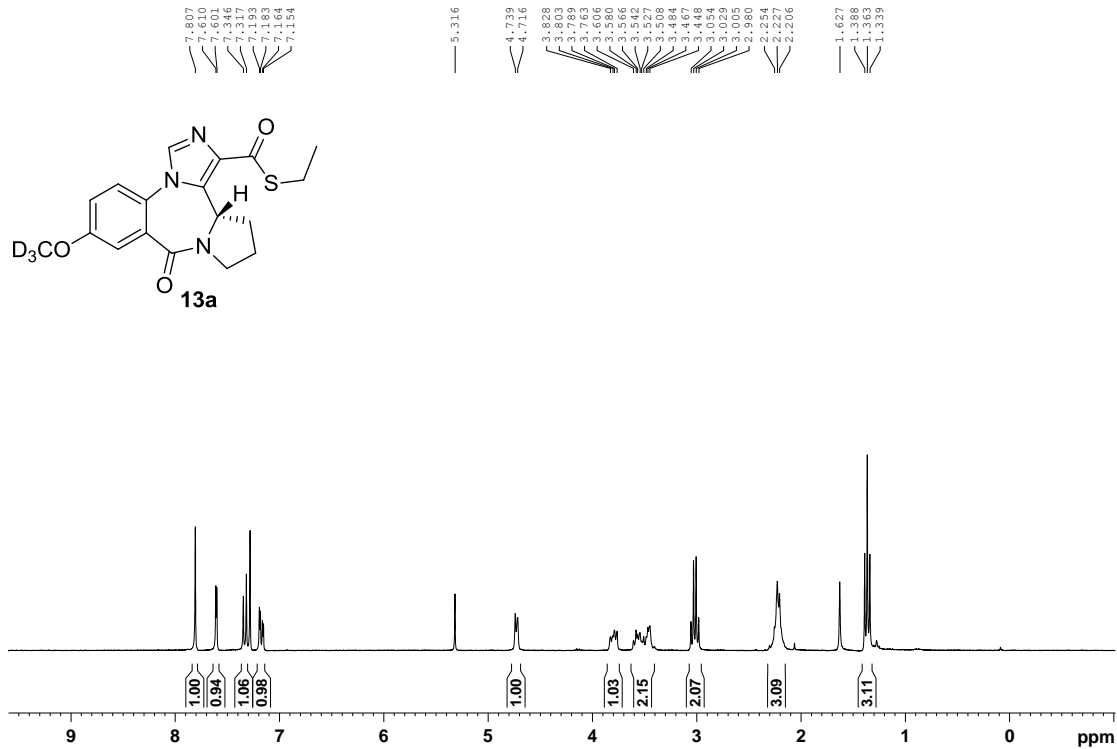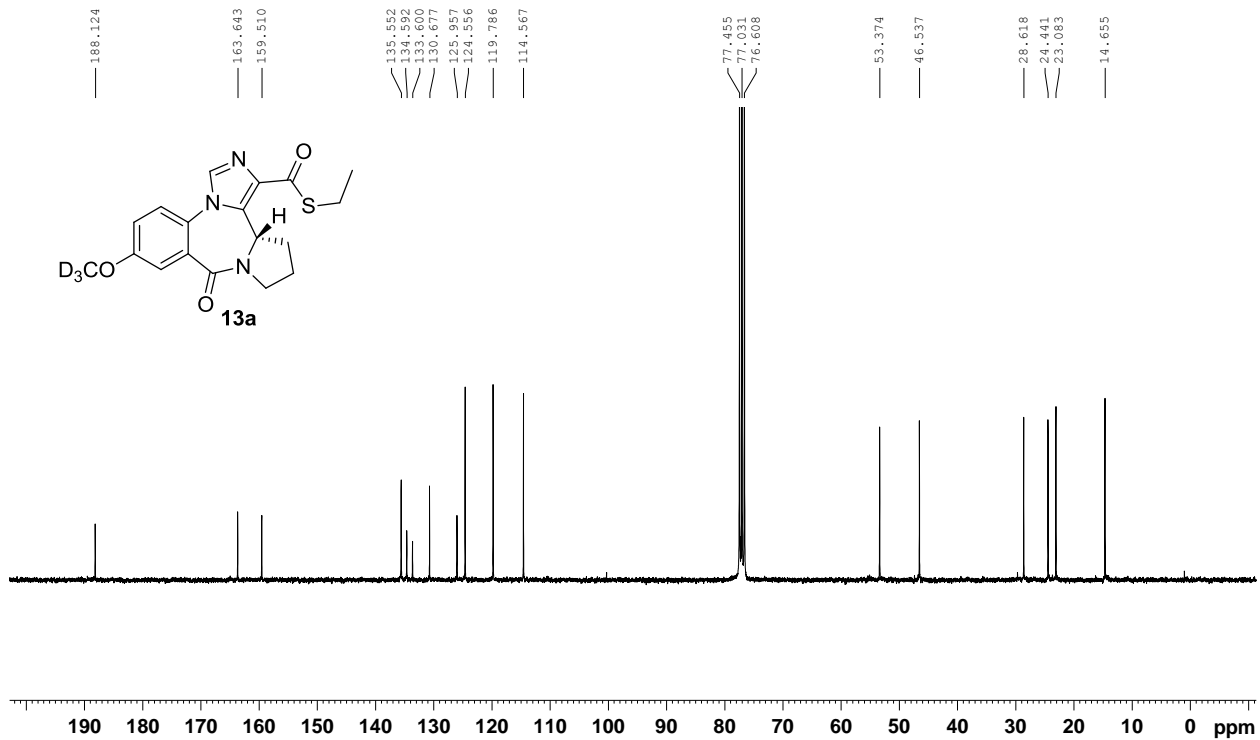

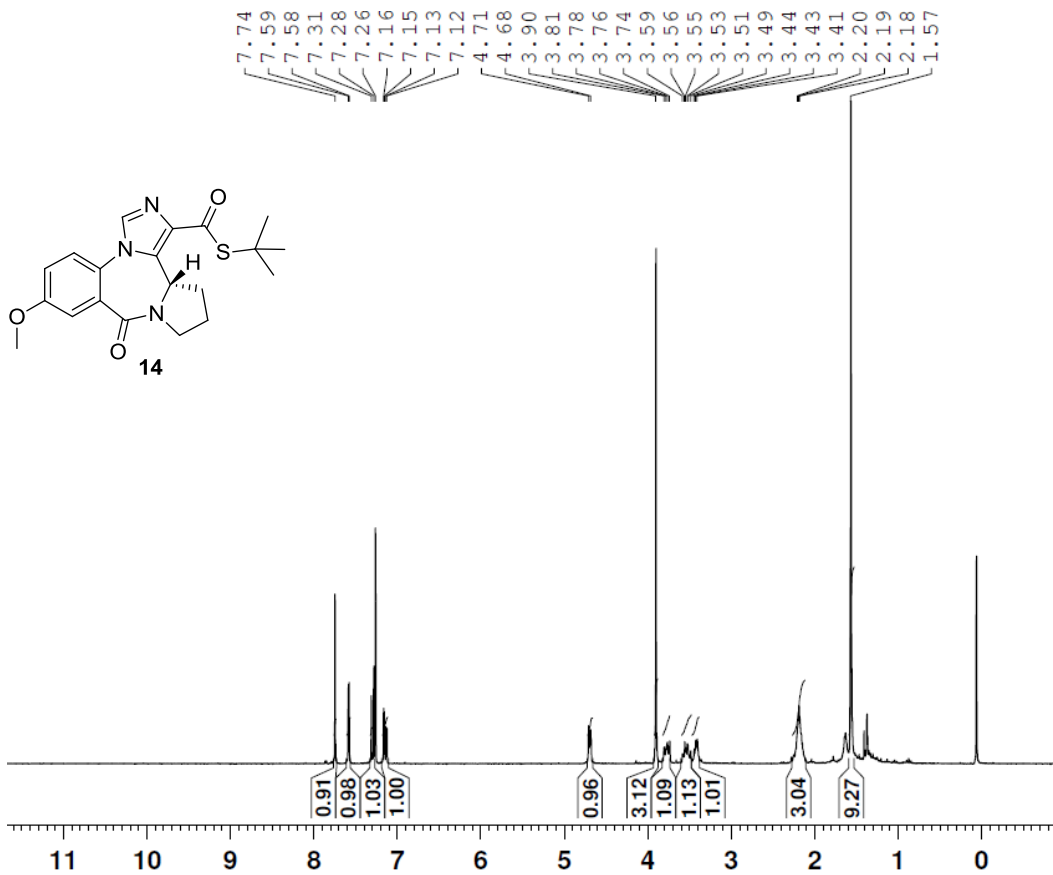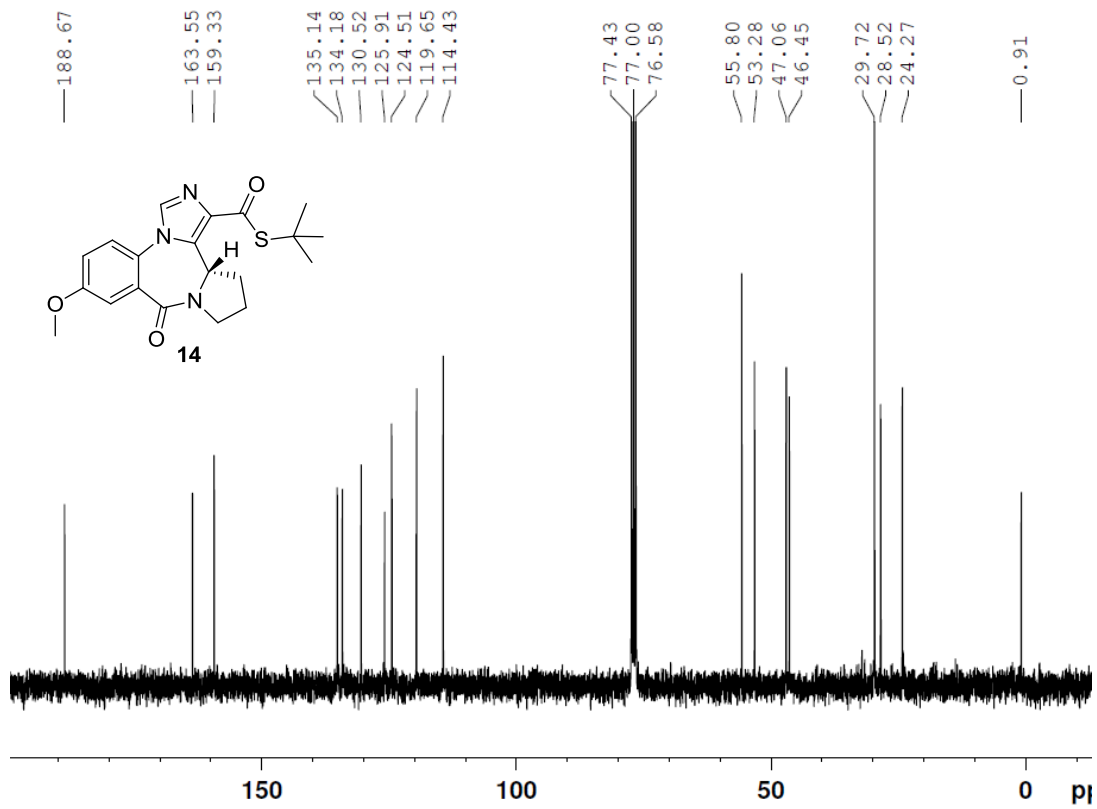

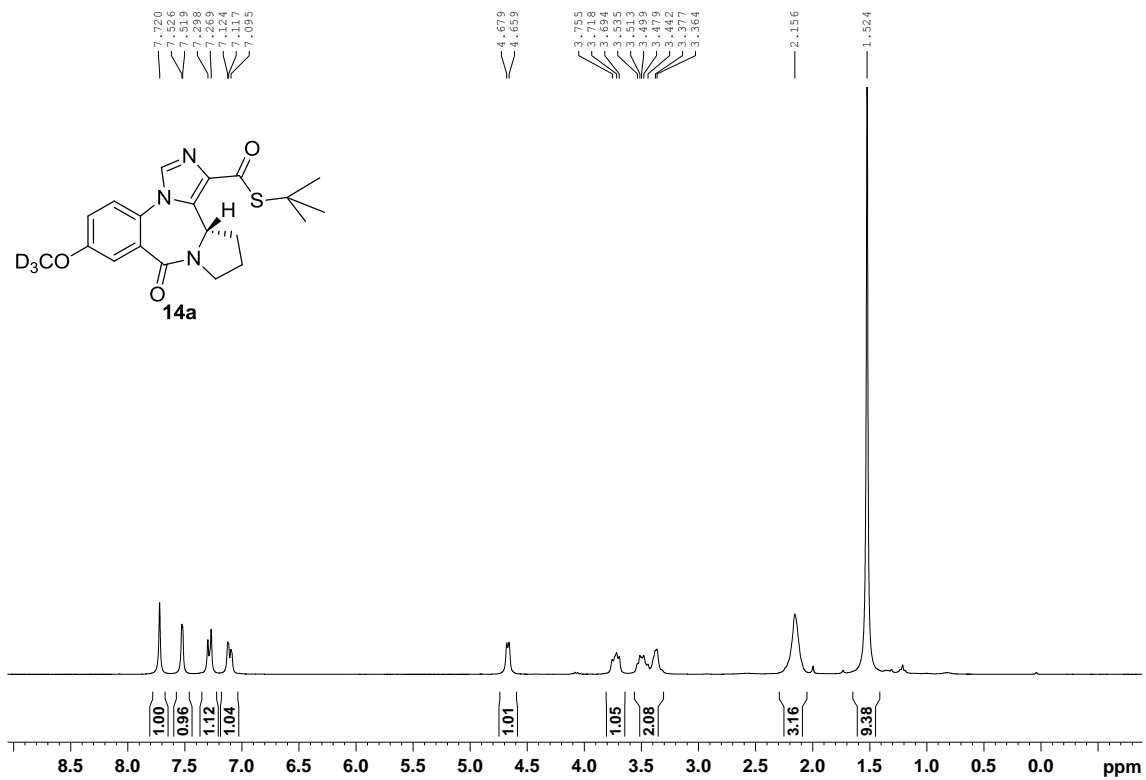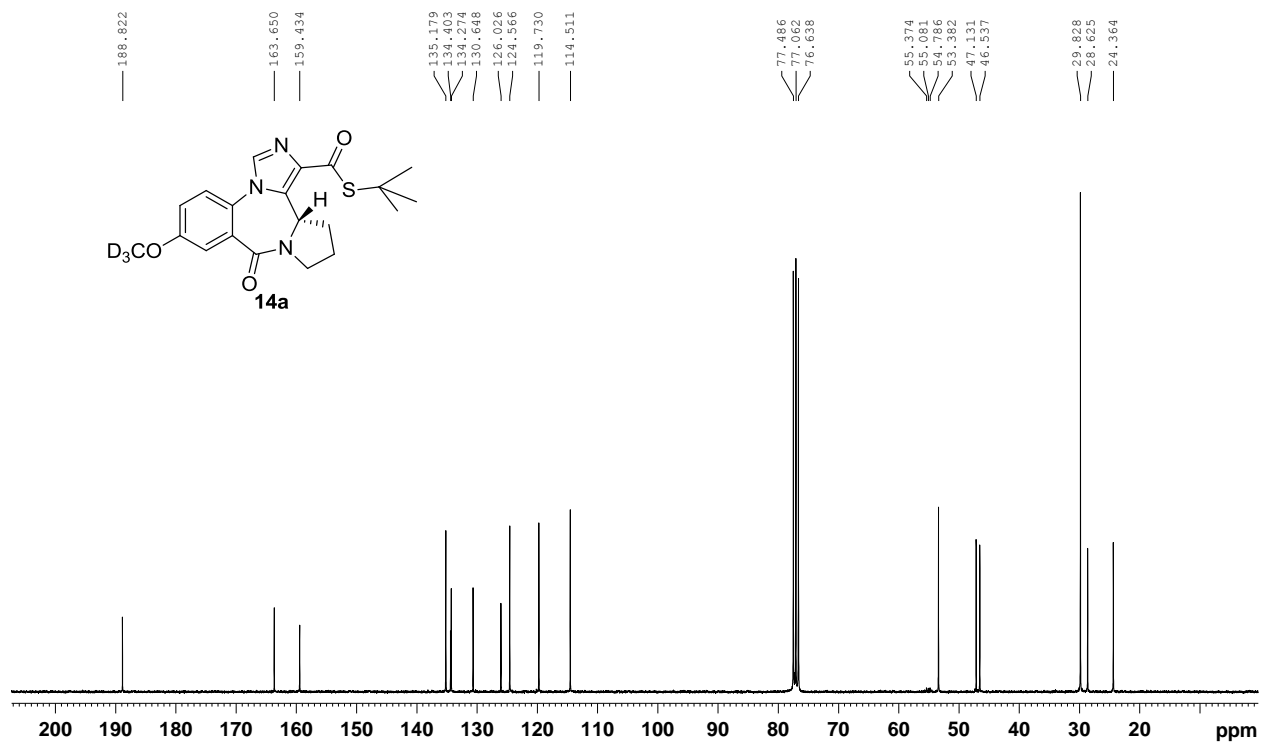

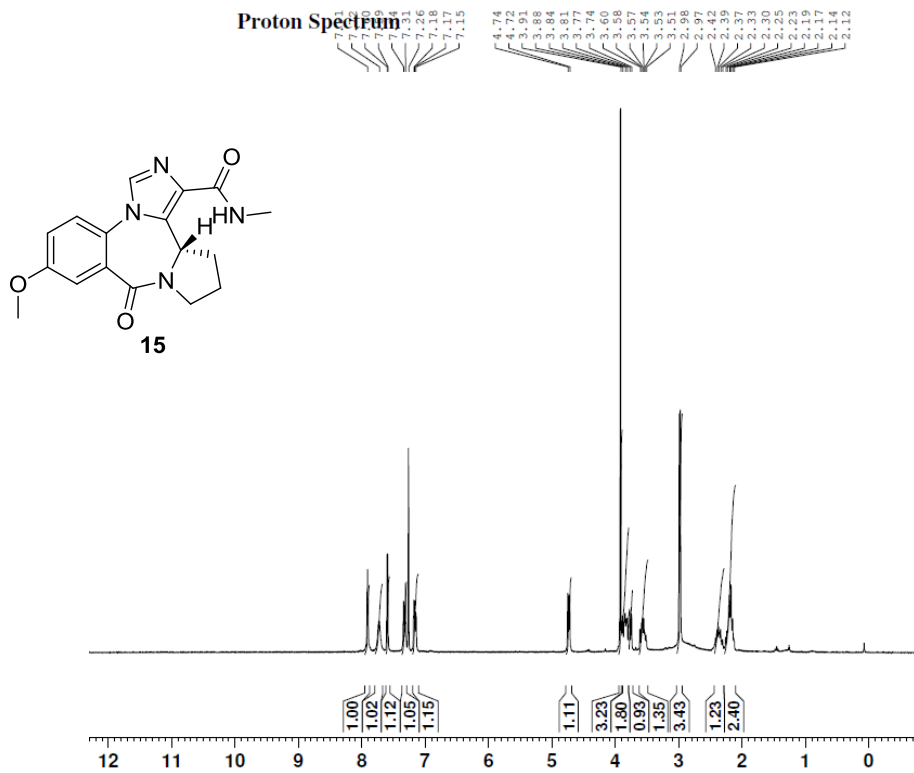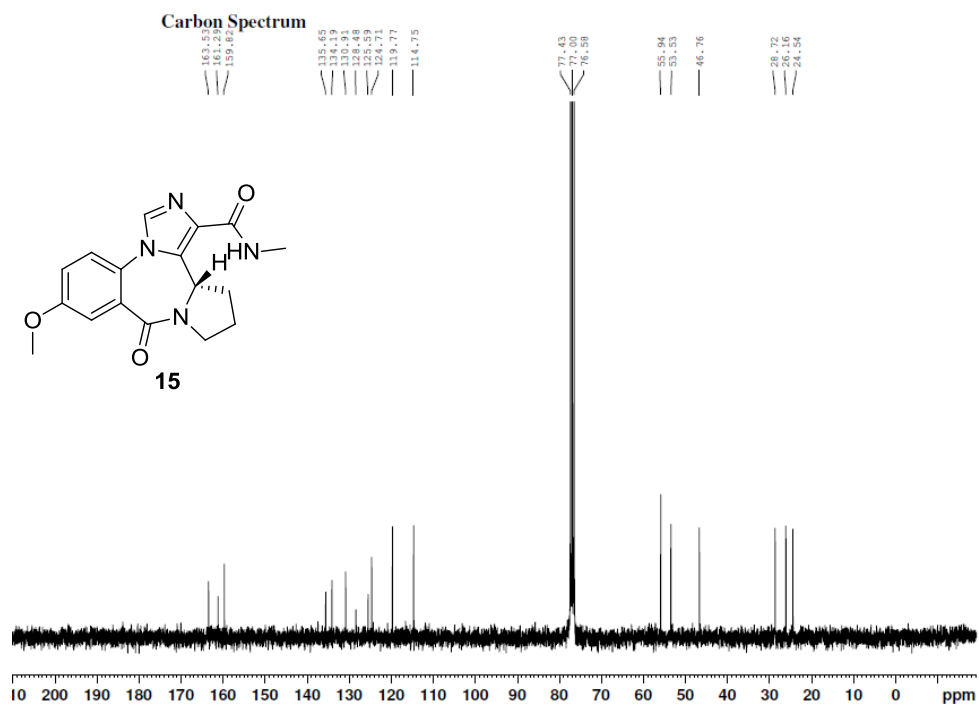

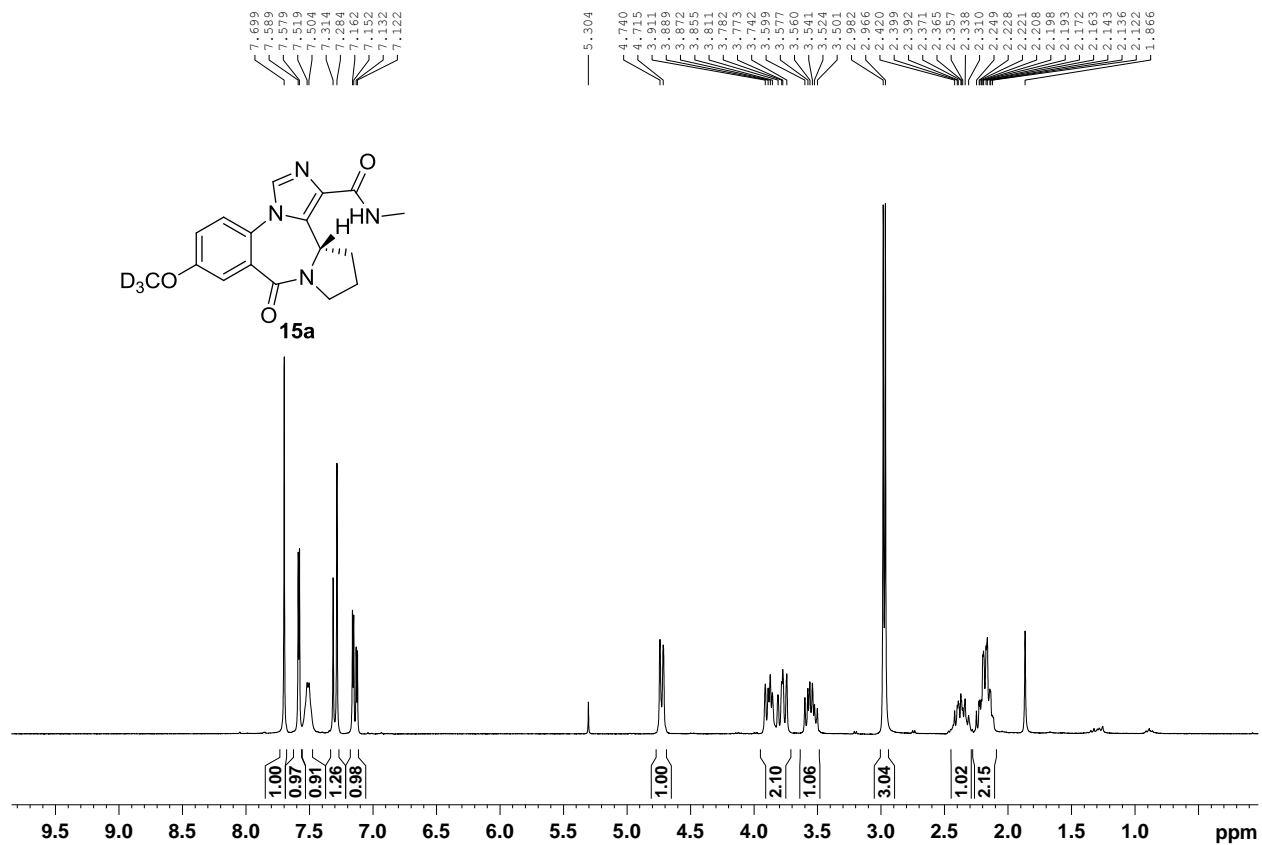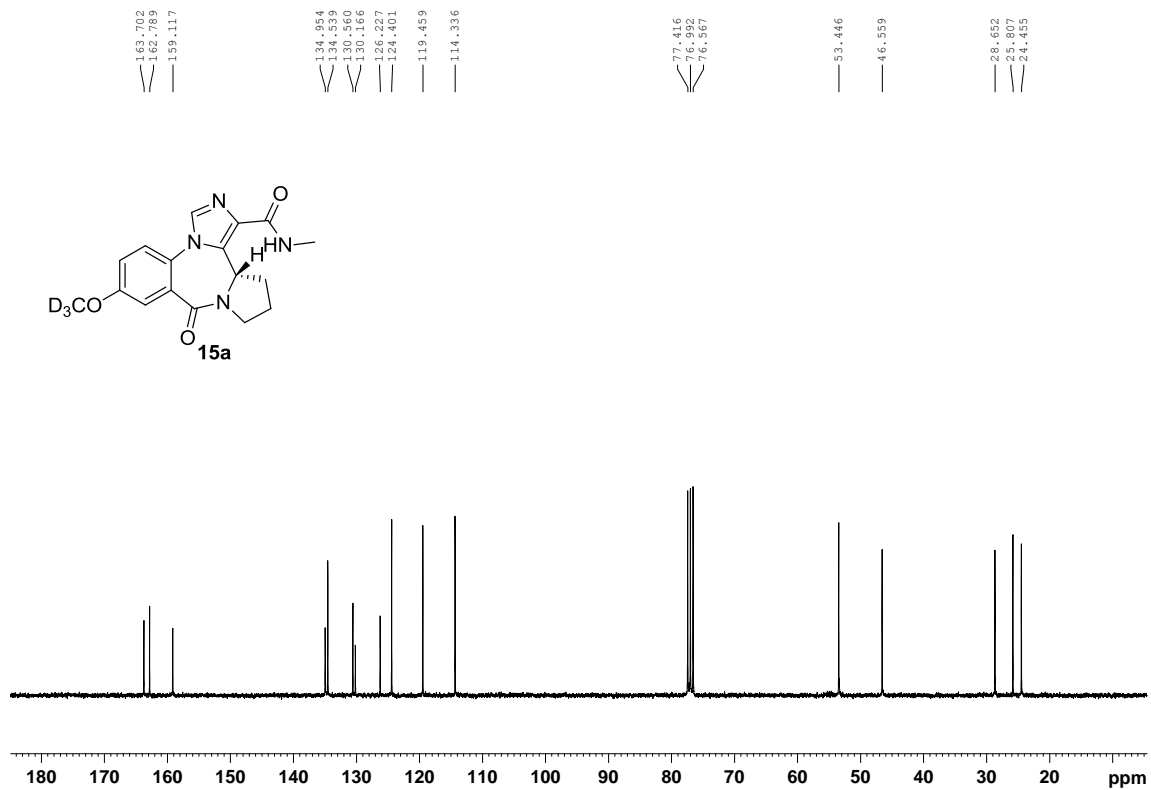

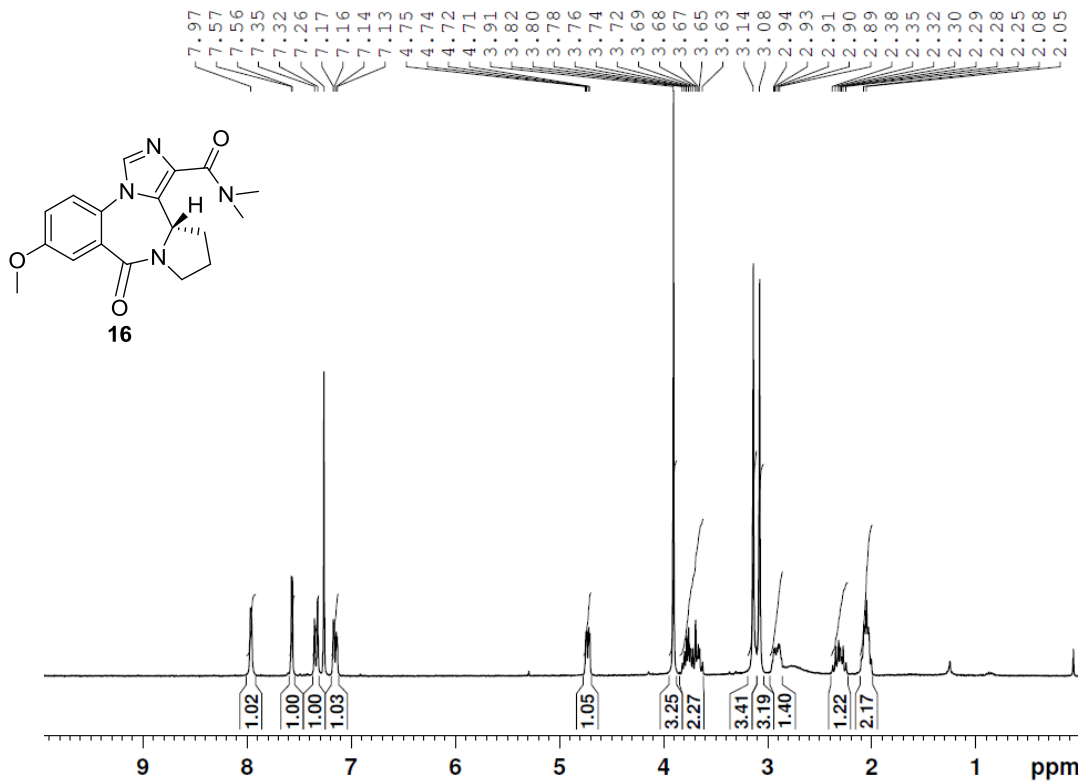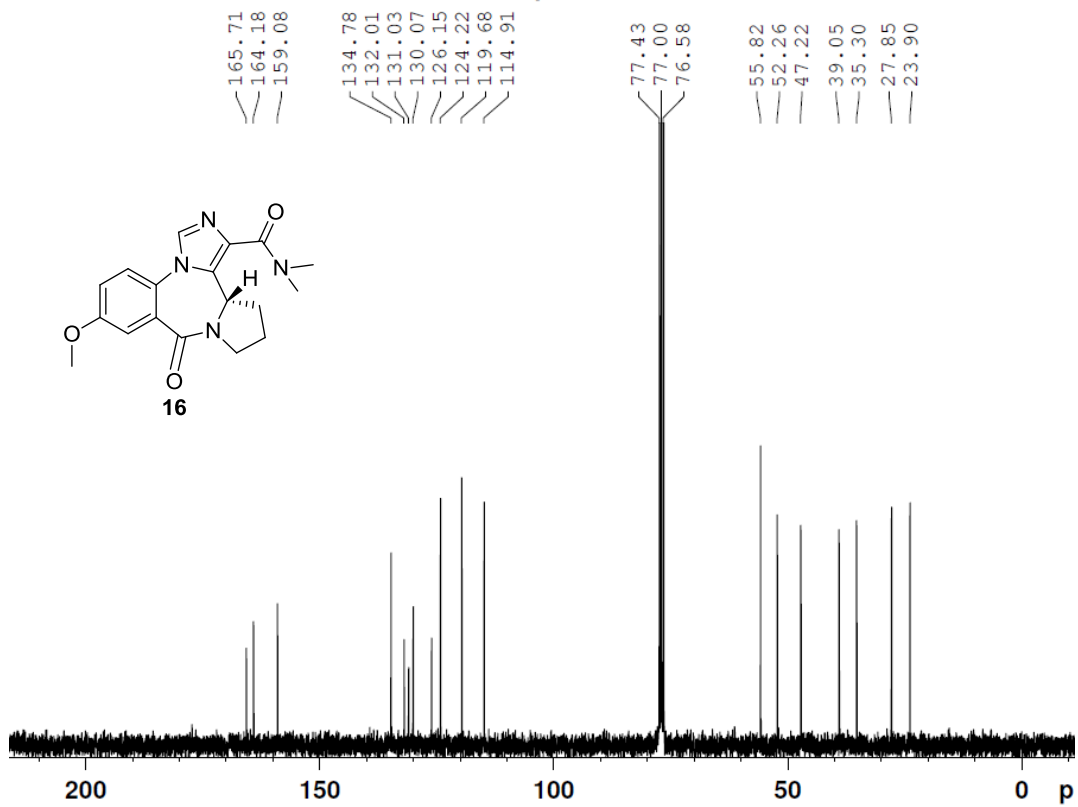

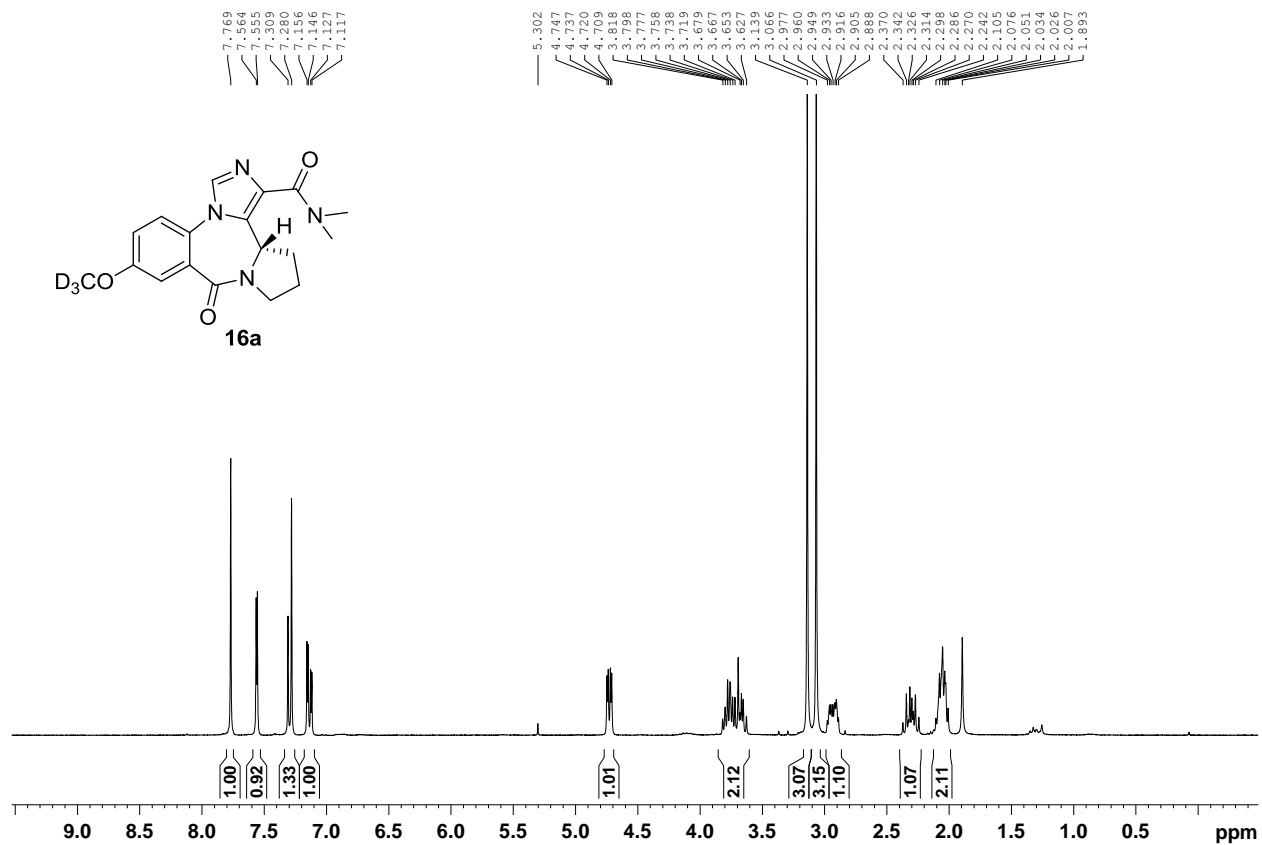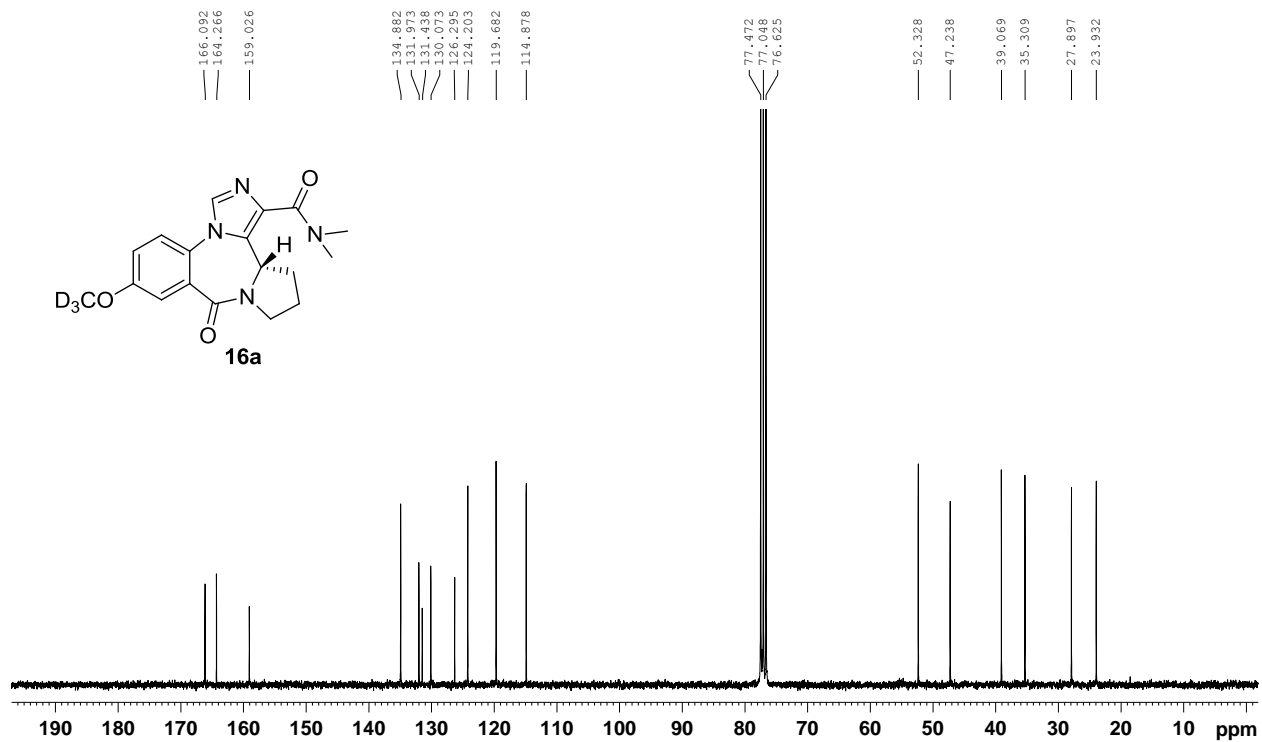

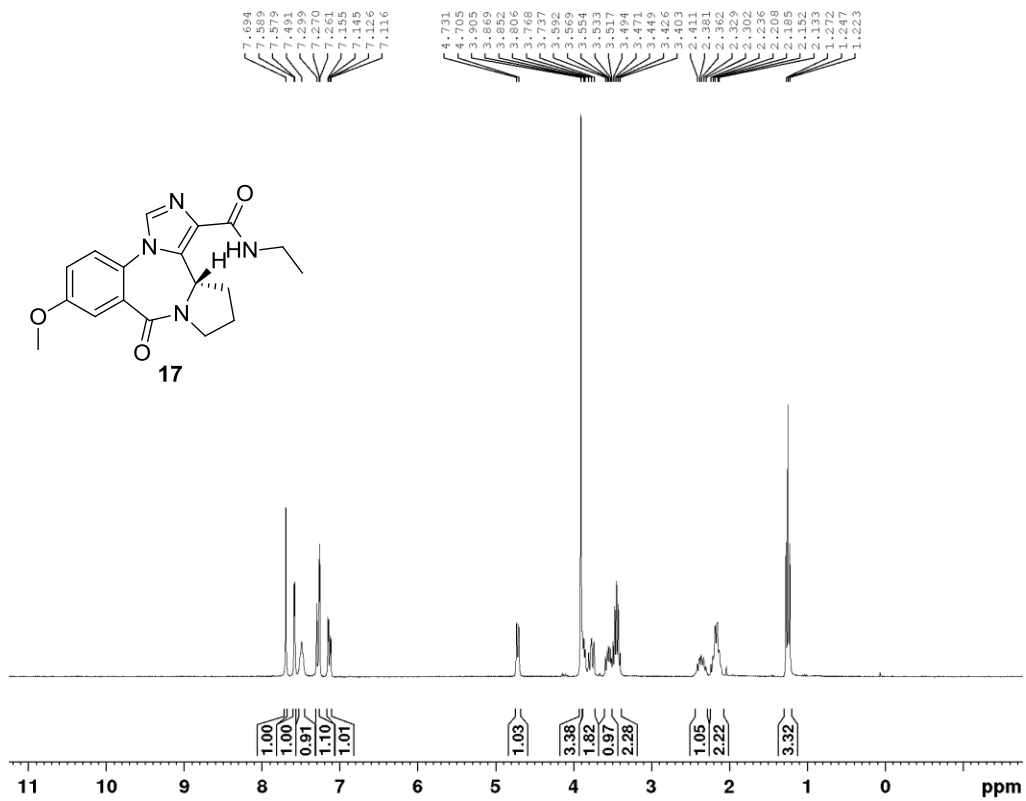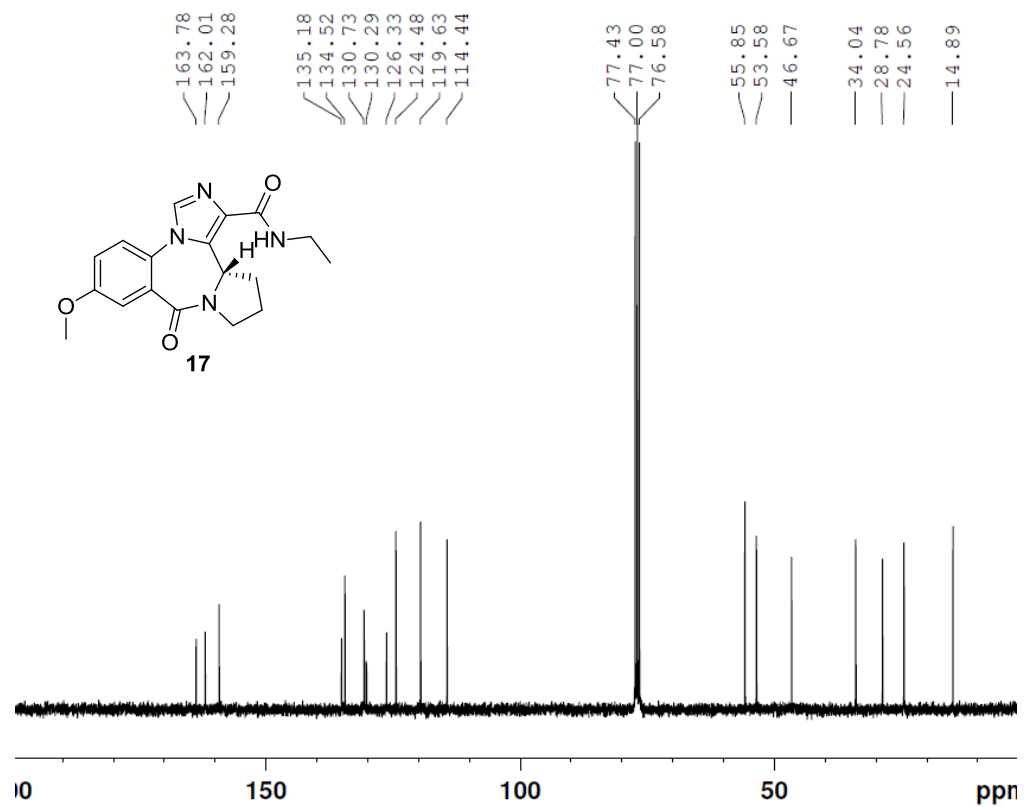



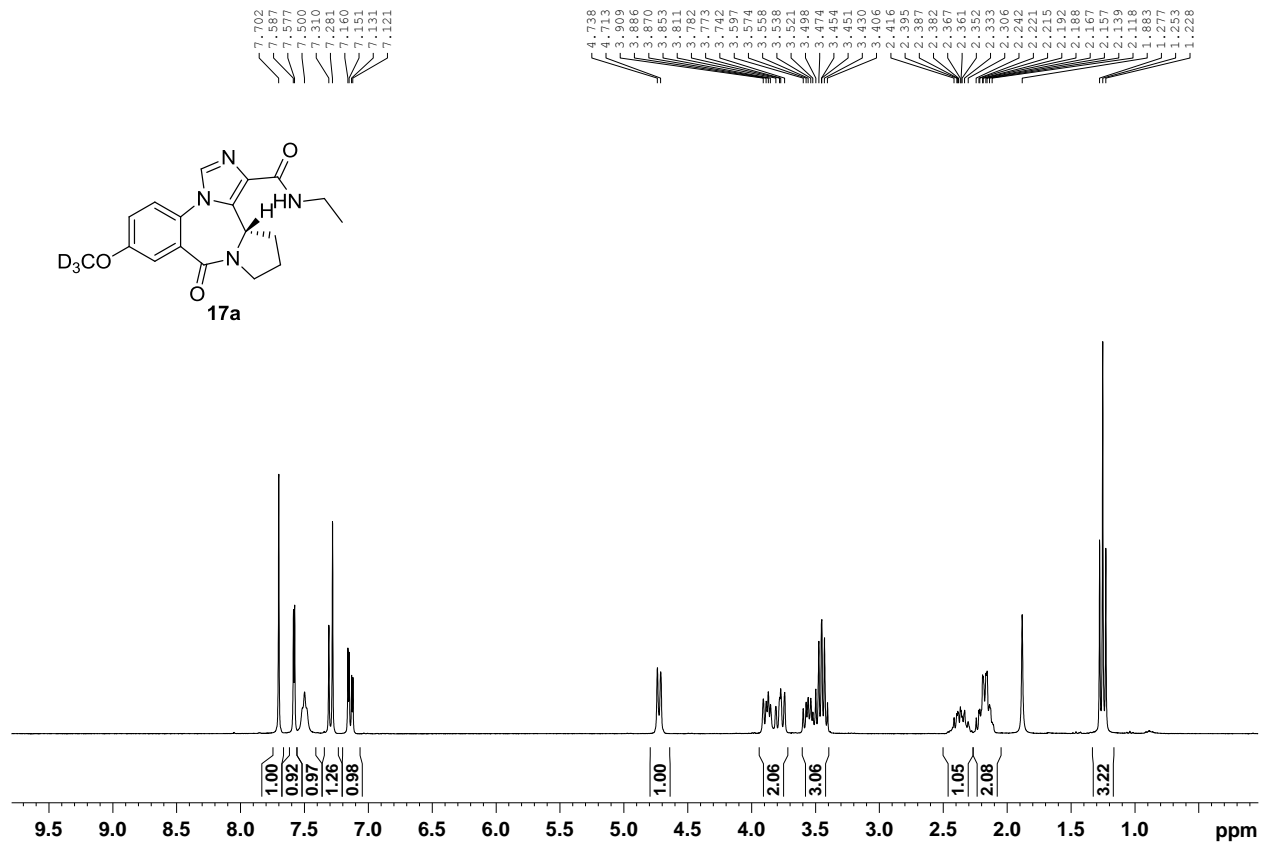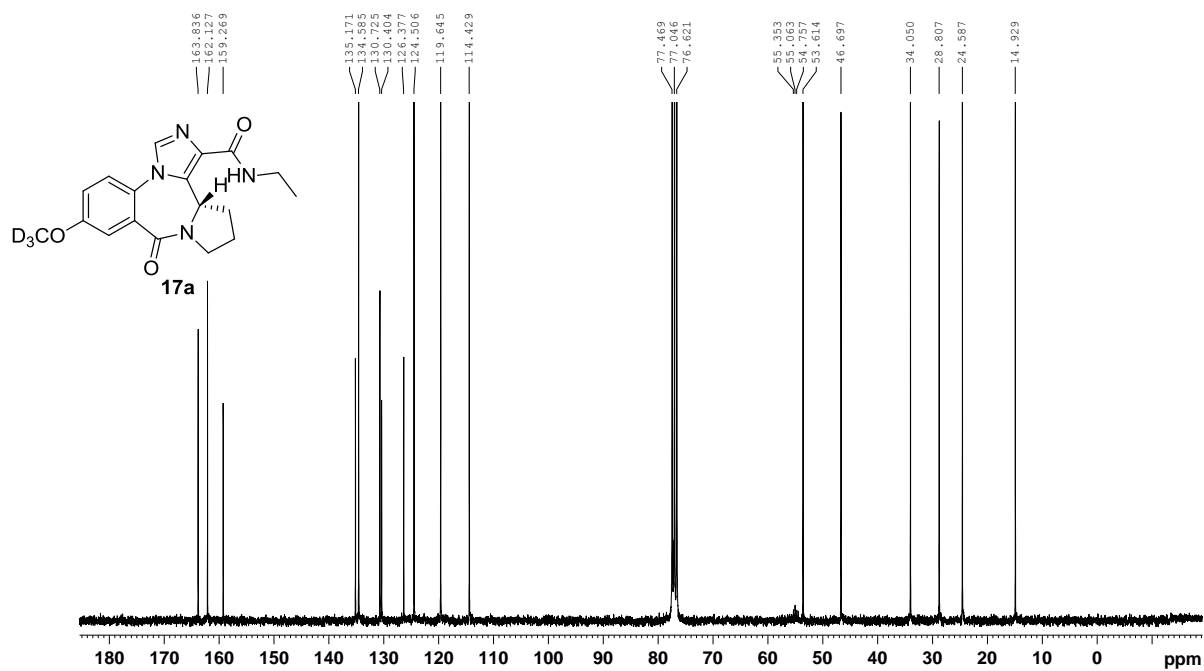

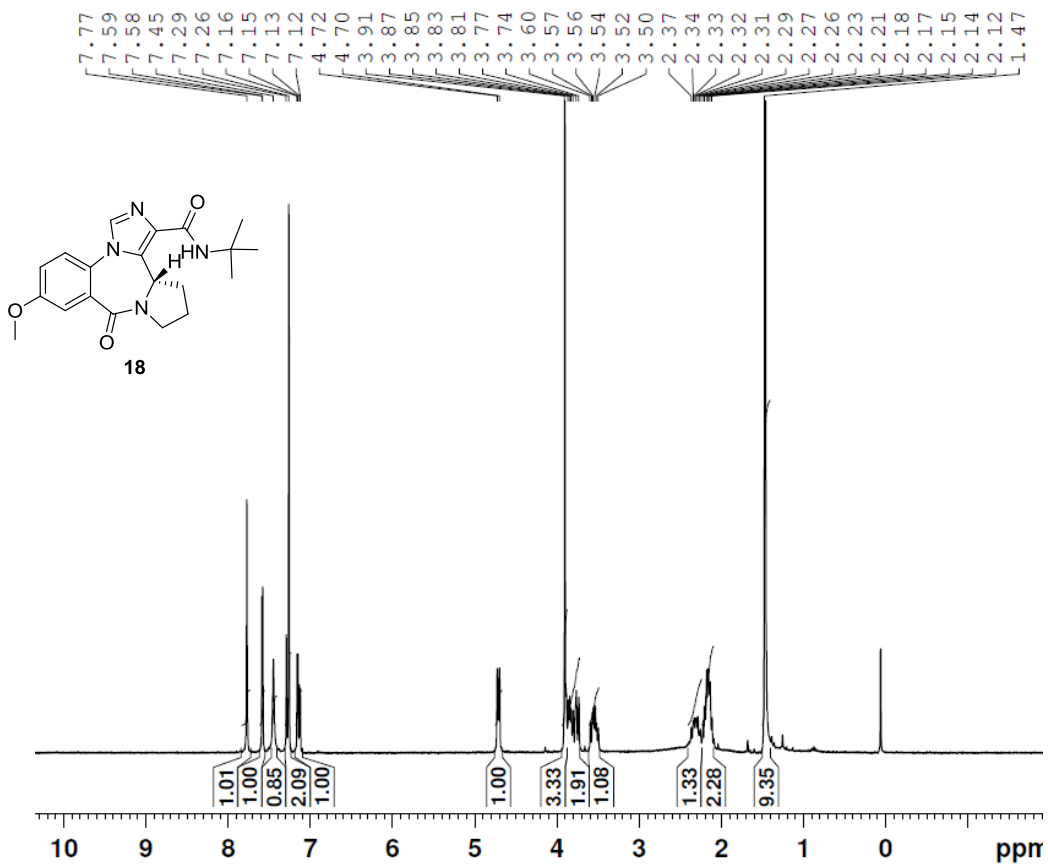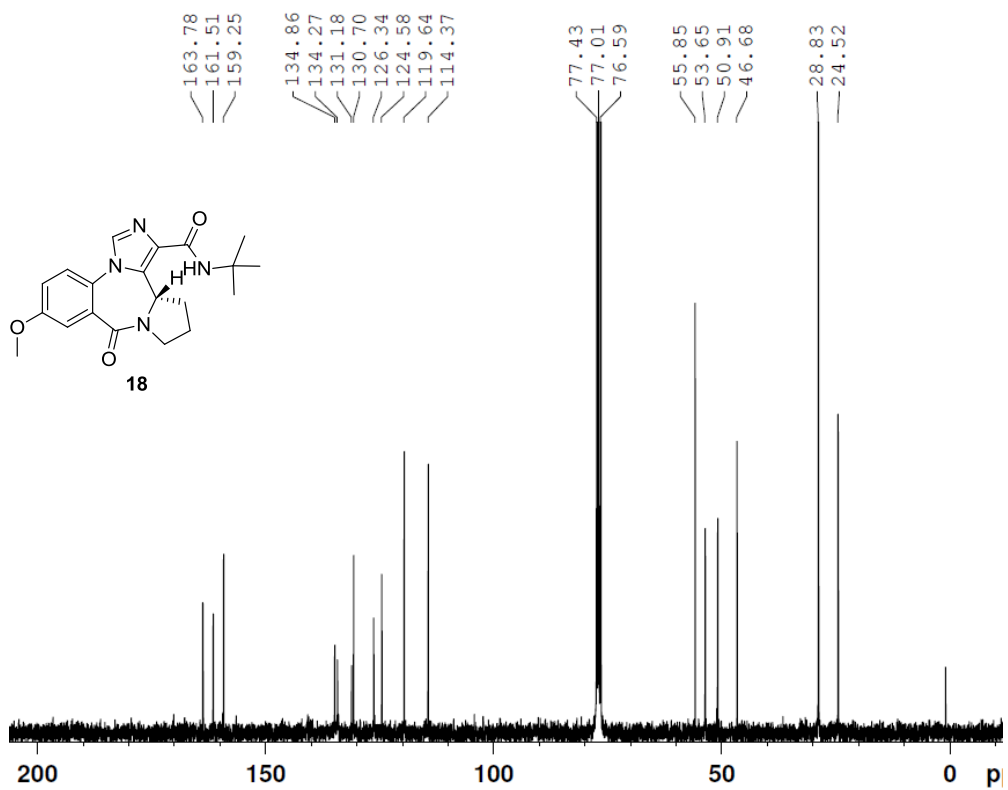

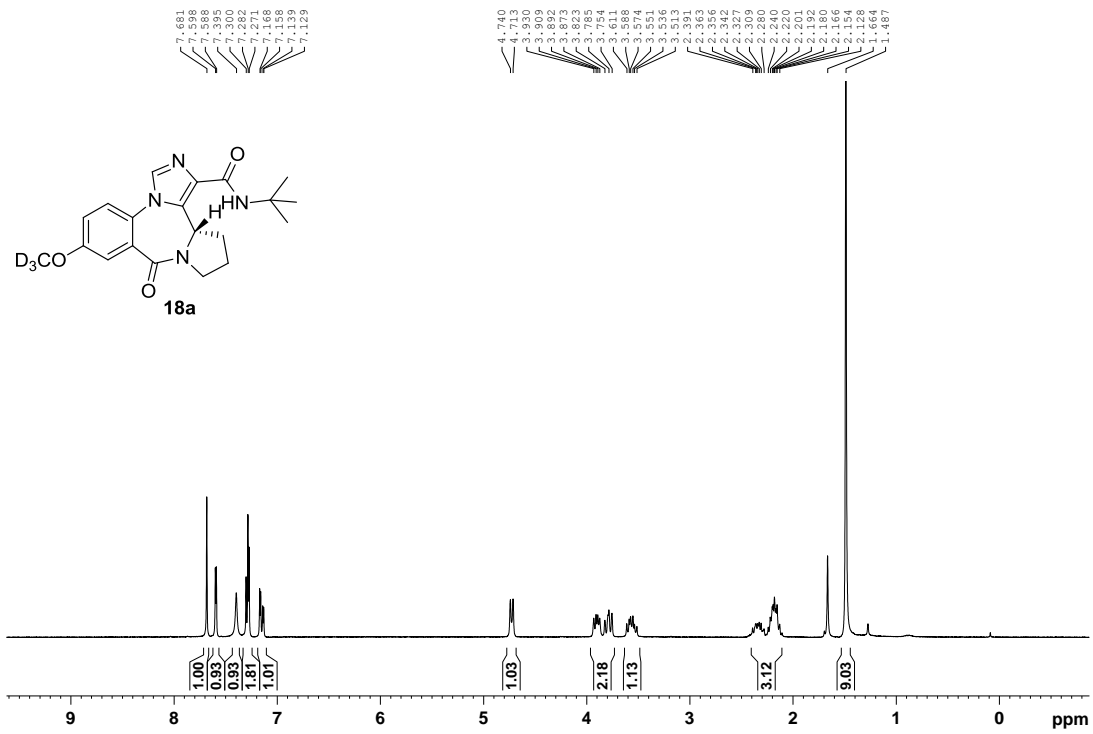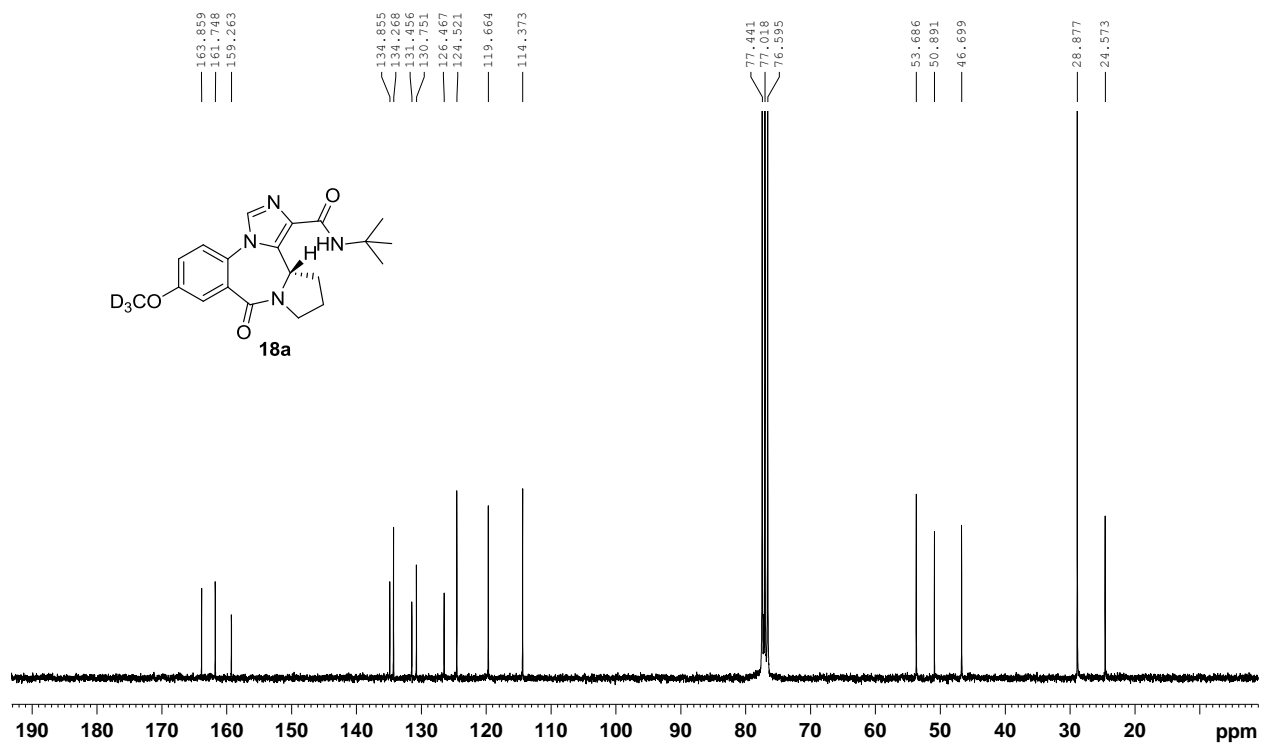

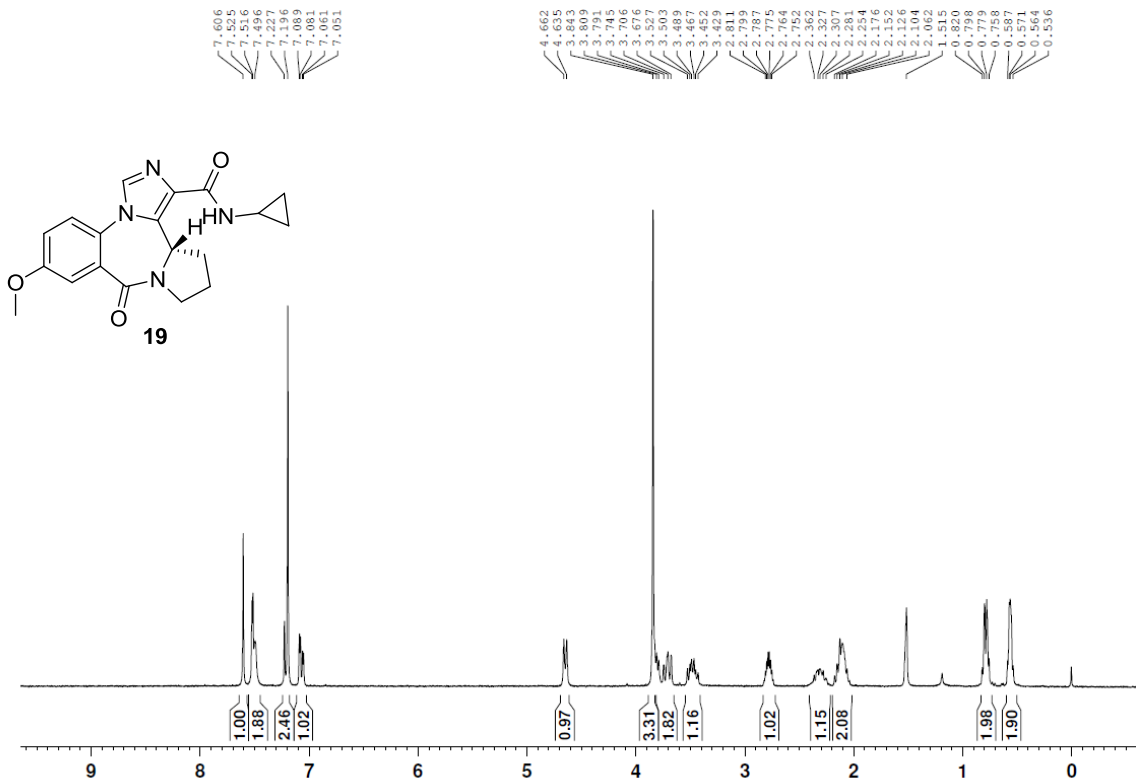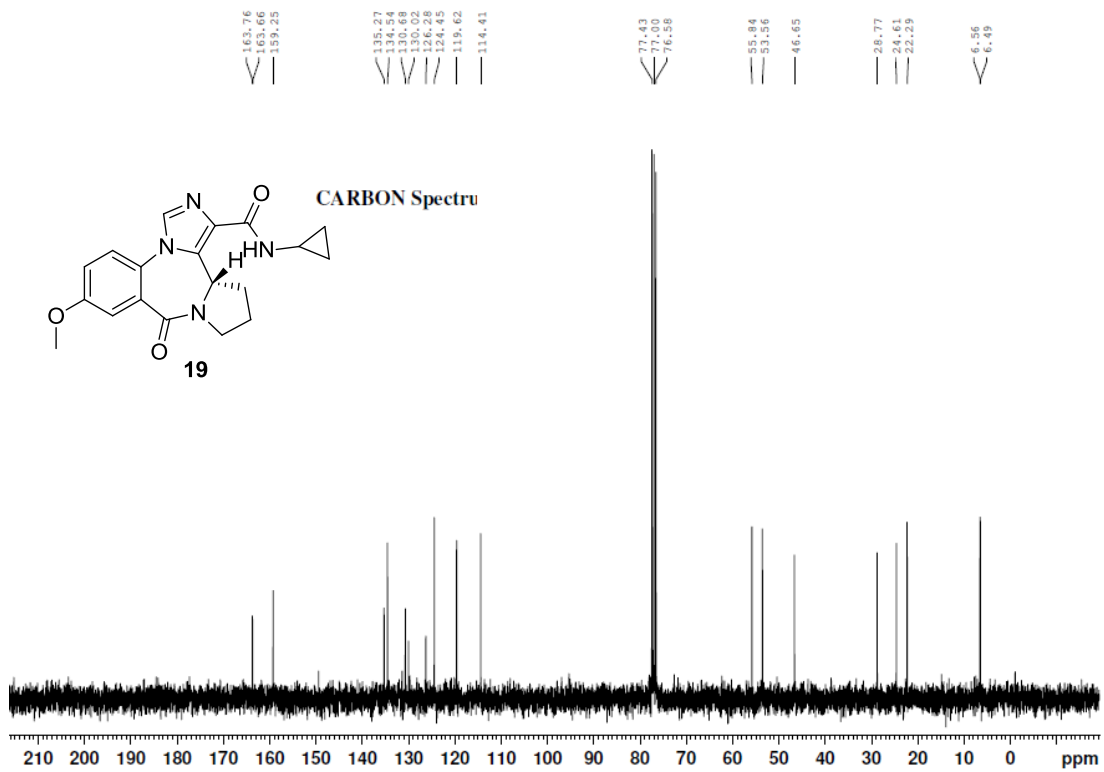

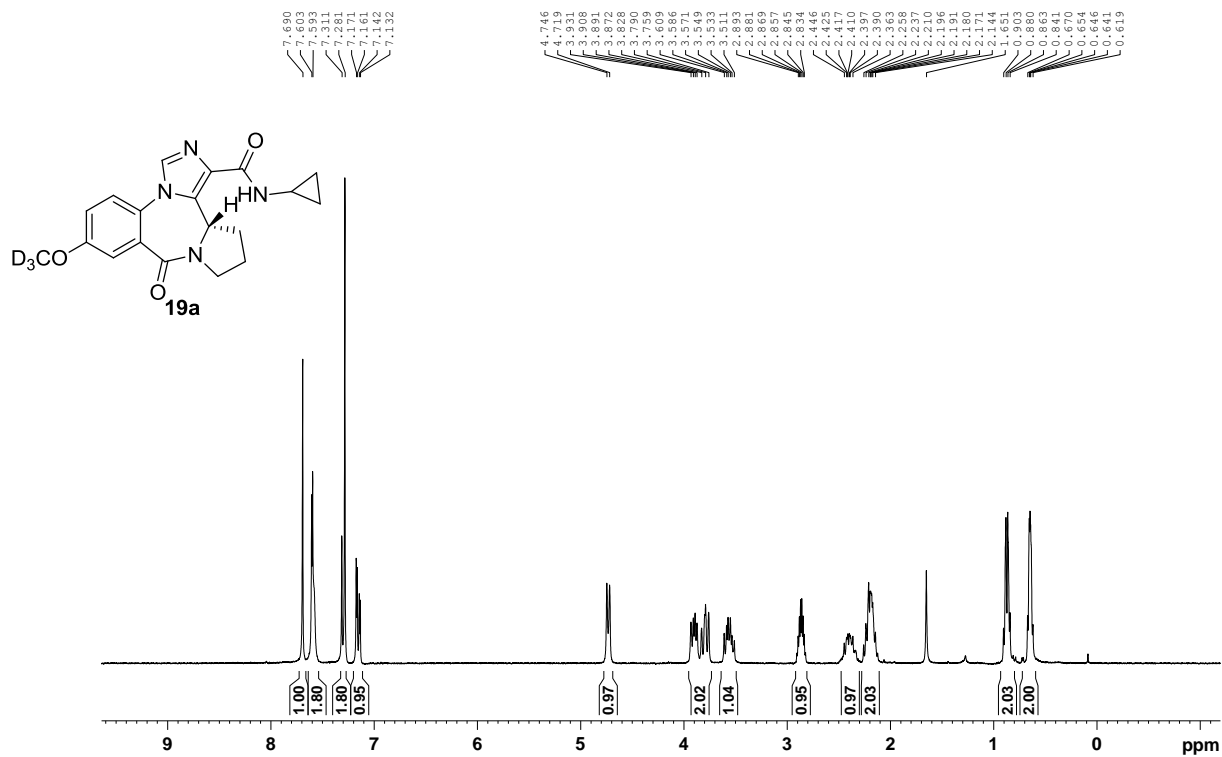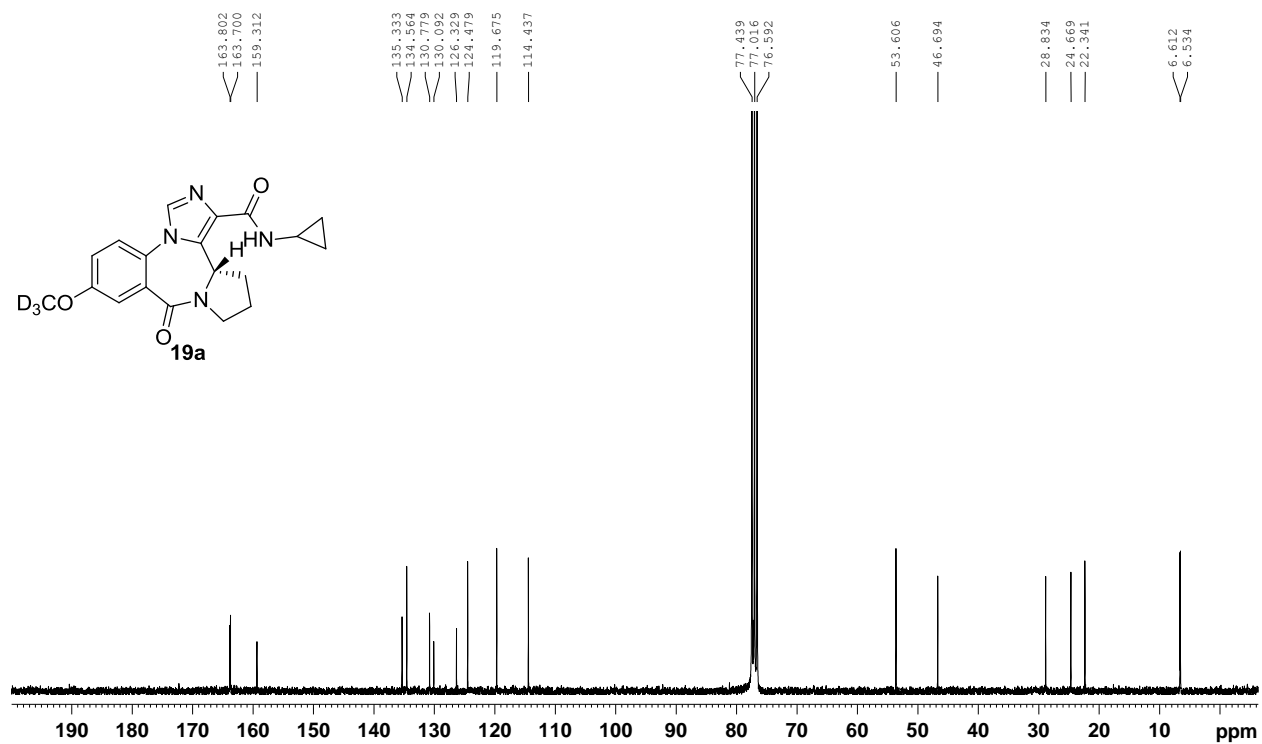

[1] G.S. Forkuo, M.L. Guthrie, N.Y. Yuan, A.N. Nieman, R. Kodali, R. Jahan, M.R. Stephen, G.T. Yocum, M. Treven, M.M. Poe, G. Li, O.B. Yu, B.D. Hartzler, N.M. Zahn, M. Ernst, C.W. Emala, D.C. Stafford, J.M. Cook, L.A. Arnold, Development of GABAA Receptor Subtype-Selective Imidazobenzodiazepines as Novel Asthma Treatments, *Mol Pharm*, 13 (2016) 2026-2038.
